# Supplementary material for: Incretin based treatments and mortality in patients with type 2 diabetes: systematic review and meta-analysis
Source: PubMed Central journal article supplement — BMJ. 2017 Jun 8;357:j2499. doi: 10.1136/bmj.j2499 (PMC5463186; doi:10.1136/bmj.j2499), 2017-06-08
Supplement: liuj036190.ww2.pdf [file liuj036190.ww2.pdf]

Appendix 2 Supplementary tables [posted as supplied by author]

Table A. Baseline characteristics of included randomised controlled trials

| Author (year)                             | International study | Number of countries involved | Number of study sites | Study phase | Total number of patients randomised | Length of follow up (weeks) | Male (n,%) | Mean age (years) | Mean BMI (kg/m <sup>2</sup> ) | Mean HbA1c (%) | Mean FPG (mmol/L) | Mean diabetes duration (years) |
|-------------------------------------------|---------------------|------------------------------|-----------------------|-------------|-------------------------------------|-----------------------------|------------|------------------|-------------------------------|----------------|-------------------|--------------------------------|
| <b>Smaller trials</b>                     |                     |                              |                       |             |                                     |                             |            |                  |                               |                |                   |                                |
| Ahren (2013) <sup>(1)</sup>               | Yes                 | 16                           | 133                   | III         | 680                                 | 24                          | 293 (43.1) | 54.7             | 32.9                          | 8              | 9.3               | NR                             |
| Ahren (2014) <sup>(2,3)</sup>             | Yes                 | 10                           | 289                   | III         | 1049                                | 164                         | 482 (47.6) | 54.5             | 32.6                          | 8.1            | 9.2               | 6                              |
| Amin (2015) <sup>(4)</sup>                | Yes                 | 5                            | 42                    | □           | 328                                 | 12                          | 213 (64.9) | 54.4             | 30.4                          | 8.1            | 9.1               | 6.3                            |
| Araki (2015) <sup>(5)</sup>               | No                  | 1                            | 35                    | III         | 361                                 | 26                          | 258 (71.0) | 56.8             | 26                            | 8              | 8.7               | 8.8                            |
| Arechavaleta (2011) <sup>(6,7)</sup>      | Yes                 | 23                           | 109                   | III         | 1035                                | 30                          | 563 (54.4) | 56.3             | 30                            | 7.5            | 8.1               | 6.8                            |
| Arjona Ferreira (2013a) <sup>(8)</sup>    | Yes                 | 12                           | 31                    | III         | 129                                 | 54                          | 77 (59.7)  | 59.5             | 26.8                          | 7.9            | 9                 | 17 <sup>s</sup>                |
| Arjona Ferreira (2013b) <sup>(9,10)</sup> | NR                  | NR                           | NR                    | NR          | 426                                 | 54                          | 253 (59.8) | 64.5             | 26.8                          | 7.8            | 8.1               | 10.4                           |
| Aroda (2016) <sup>(11)</sup>              | Yes                 | 18                           | 236                   | □           | 736                                 | 30                          | 391 (53.2) | 60.0             | 31.1                          | 8.50           | 8.0               | 12.0                           |
| Aschner (2010) <sup>(12,13)</sup>         | Yes                 | 23                           | 113                   | III         | 1050                                | 24                          | 484 (46.1) | 56               | 30.8                          | 7.3            | 7.9               | 2.4                            |
| Ba (2016) <sup>(14)</sup>                 | No                  | 1                            | 32                    | □           | 498                                 | 24                          | 249 (50.0) | 57.0             | 25.4                          | 8.54           | 10.0              | 7.0                            |
| Bajaj (2014) <sup>(15)</sup>              | Yes                 | 4                            | 52                    | III         | 272                                 | 24                          | 132 (48.5) | 53.8             | 28.2                          | 8.4            | 8.3               | NR                             |
| Barnett (2012) <sup>(16)</sup>            | Yes                 | 7                            | 53                    | III         | 227                                 | 52                          | 88 (38.8)  | 56.5             | 29.5                          | 8.1            | 10.1              | NR                             |
| Barnett (2013a) <sup>(17,18)</sup>        | Yes                 | 5                            | 33                    | III         | 241                                 | 24                          | 165 (68.5) | 74.9             | 29.7                          | 7.8            | 8.3               | NR                             |
| Barnett (2013b) <sup>(19-21)</sup>        | Yes                 | 10                           | 72                    | III         | 455                                 | 52                          | 188 (41.3) | 57.2             | 32.3                          | 8.7            | 9.6               | 11.9                           |
| Bergental (2009) <sup>(22)</sup>          | No                  | 1                            | 102                   | III         | 372                                 | 24                          | 179 (48.1) | 52.6             | 33.8                          | 10.2           | 11.3              | 9                              |
| Bergental (2012) <sup>(23)</sup>          | Yes                 | 23                           | 149                   | III         | 666                                 | 24                          | 352 (55.3) | 55.9             | 32.5                          | 8              | 9.6               | 5.9                            |
| Blonde (2015) <sup>(24)</sup>             | Yes                 | 15                           | 105                   | III         | 884                                 | 52                          | 473 (53.5) | 59.4             | 32.5                          | 8.5            | NR                | 12.7                           |
| Bolli (2014) <sup>(25)</sup>              | Yes                 | 15                           | 75                    | III         | 484                                 | ≥76                         | 225 (45.7) | 56.1             | 32.5                          | 8              | 9.5               | 6                              |
| Bosi (2007) <sup>(26)</sup>               | Yes                 | 4                            | 109                   | III         | 544                                 | 24                          | 239 (57.5) | 54.2             | 32.7                          | 8.4            | 9.9               | 6.3                            |
| Bosi (2009) <sup>(27)</sup>               | Yes                 | 5                            | >250                  | III         | 1179                                | 24                          | 684 (58)   | 52.8             | 31.3                          | 8.7            | 10.4              | 2                              |
| Buse (2011) <sup>(28,29)</sup>            | Yes                 | 5                            | 59                    | III         | 261                                 | 30                          | 148 (57.1) | 59               | 33.5                          | 8.4            | 8.1               | NR                             |

|                                     |     |    |     |     |      |     |                |      |      |      |      |                   |
|-------------------------------------|-----|----|-----|-----|------|-----|----------------|------|------|------|------|-------------------|
| Chacra (2011) <sup>(30-32)</sup>    | Yes | 12 | 115 | III | 768  | 76  | 346 (45.1)     | 55.1 | 29.2 | 8.4  | 9.6  | 6.9               |
| Davies (2012) <sup>(33)</sup>       | No  | 1  | NR  | III | 222  | 26  | 143 (66.2)     | 58.5 | NR   | 8.4  | 9.8  | 7.5               |
| Davies (2015) <sup>(34,35)</sup>    | Yes | 9  | 126 | III | 846  | 68  | 425 (50.2)     | 54.9 | 37.1 | 7.9  | 8.8  | 7.3               |
| Davies (2016) <sup>(36)</sup>       | Yes | 6  | 78  | III | 279  | 26  | 140 (50.5)     | 67.2 | 33.9 | 8    | 9.4  | 15.1              |
| DeFronzo (2008) <sup>(37,38)</sup>  | Yes | 16 | 117 | III | 329  | 26  | 175 (53.2)     | 53.4 | NR   | 7.9  | NR   | NR                |
| DeFronzo (2009) <sup>(39,40)</sup>  | Yes | 9  | 154 | III | 745  | 206 | 377 (50.7)     | 54.6 | 31.4 | 8.1  | 9.8  | 6.5               |
| DeFronzo (2012) <sup>(41)</sup>     | Yes | 20 | 327 | NR  | 1554 | 26  | 697 (44.9)     | 55.4 | 31.2 | 8.5  | 10   | 6.2               |
| DeFronzo (2015) <sup>(42,43)</sup>  | Yes | 22 | 197 | III | 1363 | 52  | 721 (53.8)     | 55.4 | 31.3 | 8    | 8.7  | NR                |
| Del Prato (2014) <sup>(44,45)</sup> | Yes | 32 | 310 | III | 2639 | 104 | 1312<br>(49.7) | 55.4 | 31.2 | 7.6  | NR   | 5.5               |
| Diamant (2014a) <sup>(46-49)</sup>  | Yes | 16 | 72  | III | 467  | 156 | 243 (53.3)     | 58   | 32.3 | 8.3  | 9.8  | NR                |
| Diamant (2014b) <sup>(50,51)</sup>  | Yes | 17 | 108 | III | 637  | 30  | 261 (51.2)     | 59.5 | 32.4 | 8.2  | 7.1  | 11.5 <sup>s</sup> |
| Dobs (2013) <sup>(52)</sup>         | Yes | NR | 41  | III | 278  | 54  | 111 (42.4)     | 54.5 | 30.3 | 8.8  | 10.1 | 9.3               |
| Dungan (2016) <sup>(53,54)</sup>    | Yes | 8  | 31  | III | 300  | 24  | 132 (44.1)     | 58   | 31.2 | 8.4  | 9.8  | 7.6               |
| Ferdinand (2014) <sup>(55)</sup>    | Yes | 3  | 76  | III | 755  | 26  | 392 (51.9)     | 56.5 | 33   | 7.9  | NR   | 8.3               |
| Ferrannini (2009) <sup>(56)</sup>   | Yes | 24 | 402 | III | 2789 | 52  | 1490<br>(53.4) | 57.5 | 31.8 | 7.3  | 9.2  | 5.7               |
| Filozof (2010) <sup>(57)</sup>      | NR  | NR | NR  | III | 1007 | 52  | 524 (52)       | 59.5 | 31   | 8.5  | 10.7 | 6.6               |
| Fonseca (2007) <sup>(58)</sup>      | Yes | 4  | 68  | III | 296  | 24  | 152 (51.4)     | 59.2 | 33.1 | 8.4  | 9    | 14.7              |
| Forst (2015) <sup>(59)</sup>        | No  | 1  | 47  | □   | 162  | 24  | 94 (58.4)      | 66.7 | 30.5 | 7.7  | NR   | 8                 |
| Frederich (2012) <sup>(60,61)</sup> | Yes | 4  | 72  | III | 366  | 76  | 168 (46)       | 55   | 30.5 | 7.9  | 9    | 1.7               |
| Frías (2016) <sup>(62)</sup>        | Yes | 6  | 109 | □   | 695  | 28  | 328 (47.9)     | 54.3 | 32.7 | 9.30 | 10.9 | 7.4               |
| Gallwitz (2012a) <sup>(63,64)</sup> | Yes | 16 | 209 | III | 1551 | 105 | 933 (60.2)     | 59.8 | 30.2 | 7.7  | 9.2  | NR                |
| Gallwitz (2012b) <sup>(65,66)</sup> | Yes | 14 | 128 | III | 1029 | 234 | 524 (53.6)     | 56   | 32.5 | 7.5  | 8.8  | 5.7               |
| Gao (2009) <sup>(67,68)</sup>       | Yes | 4  | 23  | III | 472  | 16  | 207 (44.4)     | 54.5 | 26.3 | 8.3  | 9.3  | 8                 |
| Garber (2008) <sup>(69)</sup>       | Yes | 5  | 114 | III | 515  | 24  | 241 (59.1)     | 58.2 | 31.3 | 8.5  | 10.4 | 7.1               |

|                                       |     |    |     |       |      |     |            |      |      |     |      |      |
|---------------------------------------|-----|----|-----|-------|------|-----|------------|------|------|-----|------|------|
| Garber (2009) <sup>(70,71)</sup>      | Yes | 2  | 138 | III   | 746  | 52  | 371 (49.7) | 53   | 33   | 8.3 | 9.4  | 5.4  |
| Giorgino (2015) <sup>(72)</sup>       | Yes | 21 | 78  | III   | 810  | 78  | 414 (51.3) | 56.7 | 31.6 | 8.1 | 9.1  | 9.1  |
| Goke (2013) <sup>(73-75)</sup>        | Yes | 11 | 130 | III   | 858  | 104 | 444 (51.7) | 57.6 | 31.4 | 7.7 | 8.9  | NR   |
| Goodman (2009) <sup>(76)</sup>        | Yes | 2  | 67  | III   | 370  | 24  | 213 (57.6) | 54.8 | 31.5 | 8.6 | 10.9 | NR   |
| Gough (2014) <sup>(77)</sup>          | Yes | 19 | 271 | III   | 1663 | 26  | 843 (50.8) | 55   | 31.2 | 8.3 | 9.2  | 6.9  |
| Grunberger (2012) <sup>(78)</sup>     | Yes | 7  | 44  | □     | 164  | 12  | 74 (45.1)  | 56.6 | 32.1 | 7.2 | NR   | 3.9  |
| Haak (2012) <sup>(79,80)</sup>        | Yes | 14 | 133 | III   | 791  | 24  | 426 (53.9) | 55.3 | 29.1 | 8.6 | 10.9 | NR   |
| Hartley (2015) <sup>(81)</sup>        | NR  | NR | 85  | III   | 480  | 30  | 202 (42.1) | 70.7 | 29.7 | 7.8 | 9.4  | 8.7  |
| Henry (2011) <sup>(82)</sup>          | No  | 1  | 3   | III   | 36   | 12  | 14 (38.9)  | 55.6 | 32.9 | 6.8 | 7.1  | 3.1  |
| Henry (2012) <sup>(83)</sup>          | Yes | 8  | 113 | III   | 326  | 24  | 170 (54.3) | 54.1 | 32.6 | 8.1 | 9.4  | 7.7  |
| Henry (2014) <sup>(84,85)</sup>       | NR  | NR | NR  | III   | 1615 | 54  | 759 (57)   | 51.8 | 30.9 | 8.8 | 10   | 4    |
| Hermans (2012) <sup>(86,87)</sup>     | Yes | 7  | NR  | III/□ | 286  | 24  | 164 (57.3) | 58.7 | 31.7 | 7.8 | 9.4  | 6.5  |
| Hirose (2015) <sup>(88,89)</sup>      | No  | 1  | 31  | □     | 156  | 12  | 111 (71.2) | 59.3 | 25.7 | 8.1 | 8.9  | 12.9 |
| Hollander (2011) <sup>(90-92)</sup>   | Yes | 8  | 133 | III   | 565  | 76  | 280 (49.6) | 54   | 30   | 8.3 | 9    | 5.2  |
| Hollander (2013) <sup>(93)</sup>      | Yes | 8  | 63  | III   | 305  | 24  | 119 (40.8) | 53.5 | 36.7 | 7.6 | 8.9  | 5.1  |
| Home (2015) <sup>(94)</sup>           | Yes | 9  | 234 | III   | 685  | 52  | 353 (53.2) | 55.2 | 32.2 | 8.2 | 9.7  | 8.9  |
| Idorn (2015) <sup>(95)</sup>          | No  | 1  | 3   | □     | 47   | 12  | 32 (80)    | 64.5 | 31   | 7.3 | NR   | 13.6 |
| Inagaki (2012) <sup>(96,97)</sup>     | No  | 1  | NR  | III   | 427  | 26  | 290 (67.9) | 56.8 | 26.2 | 8.5 | NR   | 9    |
| Iwamoto (2010) <sup>(98)</sup>        | No  | 1  | 51  | III   | 380  | 12  | 251 (66.1) | 59.1 | 24.9 | 7.6 | 9    | 5.4  |
| Kadowaki (2009) <sup>(99)</sup>       | No  | 1  | 20  | □     | 153  | 12  | 104 (68.9) | 60.3 | 25.3 | 8   | 9.2  | NR   |
| Kadowaki (2011) <sup>(100,101)</sup>  | No  | 1  | 23  | III   | 181  | 24  | 122 (68.2) | 58.4 | 25.5 | 8.2 | 9.1  | 12   |
| Kadowaki (2013a) <sup>(102)</sup>     | No  | 1  | 60  | III   | 266  | 16  | 156 (58.6) | 61.2 | 25.2 | 8.9 | 9.1  | 14   |
| Kadowaki (2013b) <sup>(103,104)</sup> | No  | 1  | 39  | III   | 204  | 12  | 144 (70.6) | 60.4 | 25.9 | 8   | 8.2  | NR   |
| Kadowaki (2013c) <sup>(105,106)</sup> | No  | 1  | 56  | □     | 324  | 12  | 213 (65.7) | 58.2 | 24.8 | 7.8 | 8.1  | 6.2  |
| Kadowaki (2014) <sup>(107)</sup>      | No  | 1  | 37  | III   | 194  | 12  | 128 (66)   | 59.4 | 24.7 | 8.4 | 9.1  | 8.8  |
| Kaku (2010) <sup>(108)</sup>          | No  | 1  | 49  | NR    | 264  | 24  | 169 (64)   | 59.7 | 24.9 | 8.4 | 9.5  | 10.3 |
| Kaku (2016) <sup>(109)</sup>          | No  | 1  | 36  | III   | 363  | 52  | 262 (72.8) | 59.5 | 25.7 | 8.1 | 8.8  | 8    |

|                                                 |     |    |     |     |      |     |            |      |      |      |      |                  |
|-------------------------------------------------|-----|----|-----|-----|------|-----|------------|------|------|------|------|------------------|
| Kawamori (2012) <sup>(110-112)</sup>            | No  | 1  | 47  | III | 561  | 12  | 395 (70.4) | 60   | 25   | 8    | 9.1  | NR               |
| Kikuchi (2009) <sup>(113)</sup>                 | No  | 1  | 38  | NR  | 291  | 12  | 195 (67)   | 59   | 24.4 | 7.4  | 9    | 5.3              |
| Kikuchi (2010) <sup>(114)</sup>                 | No  | 1  | 29  | III | 202  | 12  | 144 (71.3) | 59.7 | 24.5 | 7.9  | 9.1  | 9.2              |
| Kim (2015) <sup>(115)</sup>                     | No  | 1  | NR  | III | 204  | 16  | 109 (53.4) | 55.9 | NR   | 7.8  | 8.4  | 7.1              |
| Kim (2016) <sup>(116)</sup>                     | No  | 1  | 16  | □   | 228  | 16  | 98 (43.0)  | 54.5 | 24.9 | 8    | 8.3  | 5.4              |
| Kobayashi (2014) <sup>(117)</sup>               | No  | 1  | 37  | III | 119  | 24  | 74 (63.8)  | 58.4 | 26.1 | 7.6  | 7.6  | 6.8              |
| Kothny (2013) <sup>(118)</sup>                  | Yes | 11 | 67  | III | 449  | 24  | 229 (50.4) | 59.2 | 29   | 8.8  | 9.4  | 13.1             |
| Lavalle-Gonzalez (2013)<br><sup>(119,120)</sup> | Yes | 22 | 169 | III | 1284 | 26  | 605 (47.1) | 55.4 | 31.8 | 7.9  | 9.4  | 6.9              |
| Liutkus (2010) <sup>(121)</sup>                 | Yes | 1  | 28  | III | 165  | 26  | 98 (59.4)  | 54.7 | 33.7 | 8.2  | 9.1  | 6.3              |
| Lukashevich (2011) <sup>(122,123)</sup>         | Yes | 13 | 108 | NR  | 525  | 52  | 294 (57.1) | 66.7 | 28.4 | 7.8  | 8.6  | 15.9             |
| Lukashevich (2014) <sup>(124)</sup>             | Yes | 11 | NR  | III | 318  | 24  | 152 (47.8) | 55.1 | 28   | 8.8  | 9.4  | 7.3              |
| Macauley (2015) <sup>(125)</sup>                | NR  | 1  | NR  | □   | 44   | 26  | NR         | 62.1 | 30.3 | 6.6  | 7.8  | NR               |
| Marre (2009) <sup>(126)</sup>                   | Yes | 21 | 116 | III | 1041 | 26  | 516 (49.6) | 56.1 | 29.9 | 8.4  | 9.8  | 6.6 <sup>§</sup> |
| Mathieu (2014) <sup>(127)</sup>                 | Yes | 11 | 119 | III | 177  | 26  | 116 (65.5) | 61   | 32.2 | 7.7  | 6.2  | 12.3             |
| Mathieu (2015) <sup>(128,129)</sup>             | Yes | 30 | NR  | III | 660  | 24  | 315 (47.9) | 58.8 | 32.1 | 8.75 | 9.8  | 13.5             |
| Matthaei (2015) <sup>(130,131)</sup>            | Yes | 9  | 84  | III | 315  | 52  | 149 (47.3) | 54.6 | 31.4 | 7.9  | 8.9  | 7.7              |
| Miyagawa (2015) <sup>(132)</sup>                | No  | 1  | 33  | III | 492  | 26  | 396 (81.0) | 57.4 | 25.5 | 8.1  | 9.3  | 6.6              |
| Moretto (2008) <sup>(133)</sup>                 | Yes | 4  | 68  | III | 233  | 24  | 169 (56.3) | 54   | 31   | 7.8  | 8.9  | 2                |
| Mori (2016) <sup>(134)</sup>                    | No  | 1  | 15  | NR  | 78   | 12  | 61 (78.2)  | 67.9 | 21.7 | 6.55 | NR   | NR               |
| Moses (2016) <sup>(135)</sup>                   | Yes | 9  | 48  | III | 427  | 24  | 193 (45.7) | 54.9 | 29.1 | 8.4  | 9.2  | 7.8              |
| Nauck (2007) <sup>(136,137)</sup>               | Yes | 13 | 69  | III | 505  | 52  | 256 (51.1) | 58.5 | 30.4 | 8.6  | 11.2 | 9.9              |
| Nauck (2009) <sup>(138,139)</sup>               | Yes | 15 | 115 | III | 527  | 26  | 265 (50.3) | 55   | 32   | 7.9  | 9.5  | 6                |
| Nauck (2013a) <sup>(140,141)</sup>              | Yes | 21 | 170 | III | 1091 | 104 | 633 (58.2) | 56.7 | 31   | 8.4  | 10.1 | 7.4              |
| Nauck (2013b) <sup>(142)</sup>                  | Yes | 25 | 187 | III | 1049 | 24  | 549 (53.4) | 58   | 32   | 8.3  | 11.1 | NR               |

|                                         |     |    |     |     |      |     |            |      |                   |      |      |      |
|-----------------------------------------|-----|----|-----|-----|------|-----|------------|------|-------------------|------|------|------|
| Nauck (2014) <sup>(143,144)</sup>       | Yes | 13 | 99  | III | 1098 | 52  | 521 (47.4) | 54.2 | 31                | 8.1  | NR   | 7    |
| Nauck (2016) <sup>(145)</sup>           | Yes | 2  | 153 | III | 309  | 52  | 166 (55.1) | 52.9 | 33.5              | 8.1  | NR   | 4    |
| NCT00086515 (2010) <sup>(146,147)</sup> | Yes | 25 | 100 | III | 701  | 104 | 400 (57.1) | 54.5 | NR                | 8    | 9.5  | NR   |
| NCT00095056 (2010) <sup>(148)</sup>     | Yes | 16 | 75  | III | 91   | 54  | 47 (51.6)  | 67.9 | NR                | 7.7  | NR   | NR   |
| NCT00106704 (2010) <sup>(149,150)</sup> | Yes | 23 | 74  | III | 441  | 24  | 234 (53.1) | 56   | NR                | 8.3  | 10.1 | NR   |
| NCT00289848 (2010) <sup>(151,152)</sup> | Yes | 3  | 28  | III | 530  | 18  | 306 (57.7) | 50.9 | 25                | 8.7  | 10.5 | 2    |
| NCT00305604 (2009) <sup>(153,154)</sup> | No  | 1  | 52  | III | 206  | 24  | 97 (47.1)  | 71.9 | 31                | 7.8  | 9.6  | 7.1  |
| NCT00337610 (2009) <sup>(155,156)</sup> | Yes | 5  | 24  | III | 190  | 30  | 88 (46.3)  | 54.8 | 30.3              | 9.2  | 11.1 | 7.9  |
| NCT00511108 (2010) <sup>(157,158)</sup> | Yes | 8  | 44  | □   | 211  | 12  | 117 (55.5) | 53.6 | 30.9              | 7.9  | 9.8  | 2.4  |
| NCT00655863 (2013) <sup>(159,160)</sup> | Yes | 2  | 2   | III | 71   | 16  | 50 (70.4)  | 59   | 31.5              | 6.6  | 8.9  | 5.7  |
| NCT00707993 (2013) <sup>(161,162)</sup> | Yes | 11 | 110 | III | 441  | 52  | 198 (44.9) | 69.9 | 29.8              | 7.5  | 8.1  | 6.1  |
| NCT00713830 (2016) <sup>(163)</sup>     | Yes | 16 | 136 | □   | 859  | 120 | 434 (50.5) | 57.2 | NR                | 8.25 | 9.6  | NR   |
| NCT00715624 (2016) <sup>(164)</sup>     | Yes | 15 | 111 | □   | 495  | 125 | 228 (46.1) | 57.2 | 32.1              | 8.40 | 8.1  | 12.5 |
| NCT00800683 (2011) <sup>(165)</sup>     | Yes | 6  | 53  | III | 133  | 18  | 80 (60.2)  | 64.4 | 32                | 8.2  | 8.6  | NR   |
| NCT00819091 (2011) <sup>(166,167)</sup> | Yes | 7  | 45  | III | 245  | 18  | 129 (52.7) | 56.9 | 28.3              | 8.6  | 10   | NR   |
| NCT00839527 (2014) <sup>(168)</sup>     | Yes | 9  | 358 | III | 685  | 164 | 353 (53.2) | 55.2 | NR                | NR   | NR   | NR   |
| NCT00881530 (2014) <sup>(169,170)</sup> | Yes | 7  | 132 | □   | 659  | 78  | 334 (50.7) | 58.6 | 29.5 <sup>#</sup> | 7.9  | 9.9  | NR   |
| NCT01075282 (2014) <sup>(171)</sup>     | Yes | 21 | NR  | III | 807  | 78  | 414 (51.3) | 56.7 | 31.6              | 8.1  | 9.1  | 9.1  |
| NCT01318083 (2011) <sup>(172,173)</sup> | No  | 1  | 33  | III | 312  | 12  | 204 (65.4) | 60.2 | 24.7              | 8.6  | NR   | 9.8  |

|                                                 |     |    |     |     |      |     |            |      |      |      |      |      |
|-------------------------------------------------|-----|----|-----|-----|------|-----|------------|------|------|------|------|------|
| NCT01644500 (2015) <sup>(174)</sup>             | Yes | 3  | 30  | III | 807  | 26  | 426 (53.9) | 52.8 | NR   | NR   | NR   | NR   |
| NCT01648582 (2015) <sup>(175)</sup>             | Yes | 5  | 30  | III | 789  | 52  | 420 (54.5) | 55   | NR   | NR   | NR   | NR   |
| NCT01682759 (2016) <sup>(176)</sup>             | Yes | 10 | 115 | □   | 751  | 54  | 414 (55.1) | 57.7 | NR   | 7.46 | 8.6  | NR   |
| NCT01717313 (2016) <sup>(177)</sup>             | Yes | 12 | NR  | □   | 329  | 24  | 192 (58.4) | 57.2 | NR   | NR   | NR   | NR   |
| NCT01778049 (2016) <sup>(178)</sup>             | Yes | 11 | 114 | III | 482  | 24  | 400 (56.7) | 56.8 | NR   | NR   | NR   | NR   |
| NCT01890122 (2016) <sup>(179)</sup>             | Yes | 3  | 59  | □   | 647  | 26  | 366 (56.6) | 53.6 | 26.3 | NR   | NR   | NR   |
| Ning (2016) <sup>(180)</sup>                    | Yes | 4  | 22  | III | 293  | 24  | 127 (43.3) | 58.1 | 26.1 | 8.7  | 9.5  | 11.3 |
| Nowicki (2011) <sup>(181-183)</sup>             | Yes | 14 | 75  | III | 170  | 52  | 73 (42.9)  | 66.5 | 30.7 | 8.3  | 9.9  | NR   |
| Odawara (2014) <sup>(184)</sup>                 | No  | 1  | 20  | III | 139  | 12  | 92 (66.2)  | 58.1 | 25.6 | 8    | 9.2  | 7.1  |
| Oe (2015) <sup>(185)</sup>                      | No  | 1  | 13  | NR  | 100  | 24  | 46 (57.5)  | 67.3 | 26.7 | NR   | NR   | 3.6  |
| Oyama (2016) <sup>(186)</sup>                   | No  | 1  | 48  | NR  | 463  | 108 | 297 (67.2) | 69.3 | 25.1 | 6.96 | 7.6  | NR   |
| Pan (2008) <sup>(187)</sup>                     | Yes | 3  | 31  | III | 661  | 24  | 404 (61.1) | 51.8 | 26.2 | 8.6  | 10.1 | 1.2  |
| Pan (2012) <sup>(188,189)</sup>                 | Yes | 4  | 40  | III | 568  | 24  | 315 (55.5) | 51.4 | 25.9 | 8.2  | 9.1  | NR   |
| Pan (2016) <sup>(190)</sup>                     | No  | 3  | 21  | III | 506  | 16  | 275 (50.8) | 52.6 | 25.7 | 8    | NR   | 4.1  |
| Perez-Monteverde (2011)<br><sup>(191,192)</sup> | NR  | NR | NR  | III | 492  | 12  | 300 (61)   | 51.1 | 29.8 | 9.1  | 10.3 | NR   |
| Pfutzner (2011) <sup>(193-195)</sup>            | Yes | 13 | 211 | III | 1306 | 76  | 643 (49.2) | 52   | 30.2 | 9.5  | 11.1 | 1.7  |
| Pinget (2013) <sup>(196)</sup>                  | Yes | 13 | 150 | III | 484  | 24  | 104 (52)   | 55.8 | 33.9 | 8.1  | 9.1  | 8.1  |
| Pratley (2006) <sup>(197)</sup>                 | Yes | 2  | 15  | III | 98   | 12  | 42 (42.9)  | 55.7 | 30   | 8    | 9.6  | 4.3  |
| Pratley (2009a) <sup>(198,199)</sup>            | Yes | 13 | 125 | III | 493  | 26  | 287 (58.2) | 55.4 | 32.8 | 8    | NR   | 7.6  |
| Pratley (2009b) <sup>(200,201)</sup>            | Yes | 16 | 125 | III | 500  | 26  | 261 (52.2) | 56.6 | 30.1 | NR   | NR   | 7.7  |
| Pratley (2013) <sup>(202)</sup>                 | Yes | 17 | 130 | III | 760  | 24  | 362 (48.9) | 56.4 | 32.7 | 8.3  | 10   | 8.8  |
| Pratley (2014) <sup>(203,204)</sup>             | Yes | 13 | 198 | III | 784  | 26  | 374 (47.7) | 53.5 | 30.7 | NR   | NR   | 4    |
| Probstfield (2016) <sup>(205)</sup>             | No  | 1  | 12  | □   | 102  | 26  | 64 (63.0)  | 62.0 | 33.9 | 7.90 | NR   | 15.0 |
| Raz (2012) <sup>(206)</sup>                     | Yes | NR | 53  | III | 373  | 24  | 130 (36.7) | 54.8 | 32.3 | 7.5  | 8.8  | NR   |

|                                          |     |    |     |     |      |     |            |      |      |      |      |                   |
|------------------------------------------|-----|----|-----|-----|------|-----|------------|------|------|------|------|-------------------|
| Reasner (2011) <sup>(207-209)</sup>      | Yes | 2  | 229 | III | 1250 | 44  | 708 (56.8) | 49.7 | 33.3 | 9.9  | 12.2 | 3.4               |
| Riddle (2013) <sup>(210)</sup>           | Yes | 15 | 111 | III | 496  | 24  | 228 (46.1) | 57   | 32.1 | 8.4  | 8    | 12.5              |
| Roden (2015) <sup>(211-213)</sup>        | Yes | 9  | 124 | III | 899  | 24  | 551 (61.3) | 55.0 | 28.4 | 7.88 | 8.42 | NR                |
| Rosenstock (2008) <sup>(214,215)</sup>   | No  | 1  | 152 | III | 338  | 12  | 197 (58.3) | 54   | 30.6 | 7.9  | 9.2  | 1.23 <sup>s</sup> |
| Rosenstock (2009) <sup>(216,217)</sup>   | Yes | 13 | 110 | III | 390  | 26  | 161 (41.3) | 55.4 | 32.6 | 9.3  | 10.6 | 12.6              |
| Rosenstock (2013a) <sup>(218-220)</sup>  | NR  | 6  | 135 | III | 403  | 206 | 204 (50.9) | 53.5 | 31.7 | 7.9  | 9.7  | 2.6               |
| Rosenstock (2013b) <sup>(221,222)</sup>  | Yes | 16 | 104 | III | 495  | 12  | 250 (50.5) | 58.3 | 31.4 | 8    | 9.8  | NR                |
| Rosenstock (2014) <sup>(223)</sup>       | Yes | 16 | 136 | III | 859  | 24  | 434 (50.5) | 57.3 | 30.2 | 8.3  | 9.5  | 9.3               |
| Rosenstock (2015) <sup>(224)</sup>       | Yes | 9  | 139 | III | 534  | 24  | 268 (50.0) | 54   | 31.7 | 8.9  | 10.3 | 7.6               |
| Rosenstock (2016a) <sup>(225)</sup>      | Yes | 13 | 67  | □   | 323  | 24  | 165 (51.1) | 56.7 | 32.1 | 8.05 | 9.6  | 6.7               |
| Rosenstock (2016b) <sup>(226,227)</sup>  | Yes | 23 | 240 | □   | 1170 | 30  | 592 (50.6) | 58.4 | 31.7 | 8.09 | 9.8  | 8.8               |
| Ross (2012) <sup>(228,229)</sup>         | Yes | 9  | 81  | □   | 491  | 12  | 280 (57)   | 58.6 | 29.6 | 8    | 9.2  | NR                |
| Russell-Jones (2012) <sup>(230)</sup>    | Yes | 22 | 124 | III | 820  | 26  | 484 (59)   | 54   | 31.1 | 8.5  | NR   | 2.7               |
| Scherbaum (2008) <sup>(221,232)</sup>    | Yes | 6  | 69  | III | 306  | 52  | 182 (59.5) | 63.1 | 30.2 | 6.8  | 7.1  | 2.6               |
| Schernthaler (2013) <sup>(233,234)</sup> | Yes | 17 | 140 | III | 756  | 52  | 422 (55.9) | 56.5 | 31.6 | 8.1  | 9.3  | 9.6               |
| Schernthaler (2015) <sup>(235,236)</sup> | Yes | 13 | 152 | □   | 720  | 52  | 445 (61.8) | 72.6 | 29.6 | 7.6  | NR   | 7.6               |
| Schweizer (2007) <sup>(237)</sup>        | Yes | 10 | 183 | III | 780  | 52  | 424 (54.4) | 53.1 | 32.4 | 8.7  | 10.5 | 1.0 <sup>s</sup>  |
| Schweizer (2009) <sup>(238)</sup>        | Yes | 14 | 113 | III | 335  | 24  | 163 (48.7) | 71   | 29.6 | 7.8  | 9.2  | 3                 |
| Seck (2010) <sup>(239-241)</sup>         | Yes | 2  | 173 | III | 1172 | 104 | 694 (59.2) | 56.7 | 31.3 | 7.7  | 9.2  | 6.4               |
| Seino (2010) <sup>(242-244)</sup>        | No  | 1  | 75  | III | 411  | 24  | 268 (67)   | 58.3 | 24.5 | 8.9  | 11.3 | 8.2               |
| Seino (2011) <sup>(245,246)</sup>        | No  | 1  | 24  | NR  | 230  | 12  | 142 (61.7) | 62.1 | 24   | 8    | NR   | 7.8               |
| Seino (2012a) <sup>(247,248)</sup>       | No  | 1  | 30  | III | 288  | 12  | 198 (68.8) | 52.6 | 25.9 | 8    | NR   | NR                |

|                                                |     |    |     |     |       |      |                |      |      |     |      |      |
|------------------------------------------------|-----|----|-----|-----|-------|------|----------------|------|------|-----|------|------|
| Seino (2012b) <sup>(249)</sup>                 | Yes | 4  | 57  | III | 311   | 24   | 149 (47.9)     | 58.4 | 25.3 | 8.5 | 7.7  | NR   |
| Seino (2014) <sup>(250,251)</sup>              | No  | 1  | 30  | □   | 215   | 24   | 148 (69.8)     | 57   | 25.1 | 8.6 | NR   | 7    |
| Seino (2016) <sup>(252)</sup>                  | No  | 1  | 23  | III | 257   | 36   | 144 (56.0)     | 60.5 | 25.6 | 8.8 | 8.7  | 14.5 |
| Sheu (2015) <sup>(253)</sup>                   | Yes | 21 | 126 | □   | 685   | 78   | 387 (56.5)     | 55.1 | 29.8 | 8.1 | 9.5  | 5.4  |
| Strain (2013) <sup>(254)</sup>                 | Yes | 7  | 45  | III | 278   | 24   | 126 (45.3)     | 74.8 | 29.8 | 7.9 | 9.8  | 11.4 |
| Tajima (2011) <sup>(255)</sup>                 | No  | 1  | 34  | III | 146   | 12   | 80 (58)        | 60.8 | 24.6 | 8.4 | 8.6  | 9.1  |
| Terauchi (2014) <sup>(256)</sup>               | No  | 1  | 15  | □   | 145   | 12   | 107 (73.8)     | 52.2 | 27   | 8   | 8.7  | 4.6  |
| Thrasher (2014) <sup>(257,258)</sup>           | No  | 1  | 93  | III | 226   | 24   | 121 (53.5)     | 53.9 | 32.7 | 8.7 | 10.3 | NR   |
| Umpierrez (2011) <sup>(259)</sup>              | Yes | 2  | 39  | □   | 262   | 16   | 129 (36.4)     | 57   | 33.9 | 8.2 | NR   | NR   |
| Umpierrez (2014) <sup>(260)</sup>              | Yes | 19 | 91  | III | 807   | 52   | 353 (43.7)     | 55.6 | 33.3 | 7.6 | 9    | 2.6  |
| Vilsboll (2010) <sup>(261)</sup>               | Yes | 26 | 100 | III | 641   | 24   | 326 (50.9)     | 57.8 | 31   | 8.7 | 9.8  | 12.5 |
| Wang (2016) <sup>(262)</sup>                   | Yes | 3  | 19  | III | 306   | 24   | 152 (49.8)     | 55.5 | 25.6 | 8   | 8.9  | NR   |
| Weissman (2014) <sup>(263,264)</sup>           | Yes | 4  | 222 | III | 779   | 164  | 418 (56.1)     | 55.5 | 33.1 | 8.3 | 9.5  | 8.8  |
| White (2014) <sup>(265,266)</sup>              | Yes | 4  | 43  | III | 160   | 12   | 85 (53.1)      | 55.4 | 33.1 | 8   | 9.1  | NR   |
| Williams-Herman (2010)<br><sup>(267-270)</sup> | Yes | NR | 140 | III | 1091  | 104  | 539 (49.4)     | 53.5 | 32.1 | 8.8 | 11.3 | 4.5  |
| Wysham (2014) <sup>(271,272)</sup>             | Yes | 4  | 89  | III | 976   | 26   | 570 (58.4)     | 55.6 | 33   | 8.1 | 9    | 8.8  |
| Yang (2012) <sup>(273)</sup>                   | No  | 1  | 17  | III | 395   | 24   | 200 (50.6)     | 54.6 | 25.3 | 8.5 | 9.6  | 6.9  |
| Yang (2015) <sup>(274)</sup>                   | No  | 1  | NR  | III | 279   | 24   | 158 (56.6)     | 58.5 | 24.9 | 8.7 | 10.2 | 6.9  |
| Yki-Jarvinen (2013) <sup>(275,276)</sup>       | Yes | 19 | 167 | III | 1263  | 52   | 658 (52.2)     | 60   | 31   | 8.3 | 8.3  | NR   |
| Yokoh (2015) <sup>(277)</sup>                  | No  | 1  | 37  | NR  | 119   | 24   | 74 (63.8)      | 58.5 | 26.1 | 7.6 | 7.55 | 6.75 |
| Yu Pan (2014) <sup>(278)</sup>                 | Yes | 4  | 37  | III | 391   | 24   | 192 (49.2)     | 54.8 | 26.9 | 7.9 | 8.8  | 6.7  |
| Zinman (2009) <sup>(279)</sup>                 | Yes | 2  | 96  | III | 533   | 26   | 302 (56.7)     | 55   | 33.5 | 8.5 | 10.1 | NR   |
| <b>Large cardiovascular outcomes trials</b>    |     |    |     |     |       |      |                |      |      |     |      |      |
| Green (2015) (TECOS) <sup>(280)</sup>          | Yes | 45 | 673 | III | 14671 | 156* | NR             | NR   | NR   | 7.2 | NR   | 11.6 |
| Marso (2016) (LEADER) <sup>(281)</sup>         | Yes | 32 | 410 | III | 9340  | 197* | 6003<br>(64.3) | 64.3 | 32.5 | NR  | NR   | 12.9 |



|                                         |     |    |     |     |       |      |                 |      |      |     |     |                    |
|-----------------------------------------|-----|----|-----|-----|-------|------|-----------------|------|------|-----|-----|--------------------|
| Marso (2016) (SUSTAIN-6)<br>(282)       | Yes | 20 | 230 | III | 3297  | 104* | 2002<br>(60.7)  | 64.4 | 32.8 | 8.7 | NR  | 13.9               |
| Pfeffer (2015) (ELIXA) (283)            | Yes | 49 | 829 | III | 6068  | 108* | 4207<br>(69.3)  | 60.3 | 30.2 | 7.7 | 8.2 | 9.3                |
| Scirica (2013) (SAVOR-TIMI<br>53) (284) | Yes | 26 | 788 | □   | 16492 | 109* | 11037<br>(66.9) | 65   | 31.1 | NR  | 8.7 | 10.3 <sup>\$</sup> |
| White (2013) (EXAMINE)<br>(285)         | Yes | 55 | 898 | □   | 5380  | 78*  | 3651<br>(67.9)  | 60.9 | 29.5 | 8   | NR  | 7.2 <sup>\$</sup>  |

BMI=body mass index; FPG=fasting plasma glucose; NR=not reported.

\*median follow up time (weeks); \$ median diabetes duration (years); # median body mass index.



|                                     |      |     |     |                                                                                                                                                                                                                                        |         |    |         |         |
|-------------------------------------|------|-----|-----|----------------------------------------------------------------------------------------------------------------------------------------------------------------------------------------------------------------------------------------|---------|----|---------|---------|
| Bolli (2014) <sup>(25)</sup>        | T2DM | NR  | NR  | NR                                                                                                                                                                                                                                     |         |    |         |         |
| Bosi (2007) <sup>(26)</sup>         | T2DM | NR  | Yes | Congestive heart failure requiring pharmacologic treatment, myocardial infarction, unstable angina, or coronary artery bypass surgery within the previous 6 months                                                                     |         |    |         |         |
| Bosi (2009) <sup>(27)</sup>         | T2DM | NR  | Yes | Myocardial infarction, coronary artery bypass surgery, unstable angina or stroke within the past 6 months; congestive heart failure requiring pharmacological treatment; electrocardiogram abnormalities                               |         |    |         |         |
| Buse (2011) <sup>(28,29)</sup>      | T2DM | NR  | Yes | Cardiac disease                                                                                                                                                                                                                        |         |    |         |         |
| Chacra (2011) <sup>(30-32)</sup>    | T2DM | NR  | Yes | Cardiovascular event within six months of study entry, or New York Heart Association stage III/IV congestive heart failure and/or known left ventricular ejection fraction $\leq 40\%$                                                 |         |    |         |         |
| Davies (2012) <sup>(33)</sup>       | T2DM | NR  | NR  | NR                                                                                                                                                                                                                                     |         |    |         |         |
| Davies (2015) <sup>(34,35)</sup>    | T2DM | Yes | NR  | NR                                                                                                                                                                                                                                     | 730/846 | No | 586/846 | 564/846 |
| Davies (2016) <sup>(36)</sup>       | T2DM | NR  | Yes | New York Heart Association Functional Classification IV heart failure; episode of unstable angina, acute coronary event, cerebral stroke/transient ischemic attack, or other significant cardiovascular event within the past 180 days |         |    |         |         |
| DeFronzo (2008) <sup>(37,38)</sup>  | T2DM | NR  | NR  | NR                                                                                                                                                                                                                                     |         |    |         |         |
| DeFronzo (2009) <sup>(39,40)</sup>  | T2DM | NR  | Yes | A cardiovascular event within 6 months before study entry or New York Heart Association stage III/IV congestive heart failure and/or known left ventricular ejection fraction $\leq 40\%$                                              |         |    |         |         |
| DeFronzo (2012) <sup>(41)</sup>     | T2DM | NR  | Yes | History of New York Heart Association Class III or IV heart failure, cardiac surgery, or myocardial infarction within 6 months                                                                                                         |         |    |         |         |
| DeFronzo (2015) <sup>(42,43)</sup>  | T2DM | NR  | Yes | Acute coronary syndrome, stroke, or transient ischemic attack within 3 months prior to consent                                                                                                                                         |         |    |         |         |
| Del Prato (2014) <sup>(44,45)</sup> | T2DM | NR  | Yes | New York Heart Association Class III–IV heart failure, history of coronary angioplasty, coronary stent placement, coronary bypass surgery, myocardial infarction, stroke or transient ischemic attack in the previous 3 months         |         |    |         |         |

|                                     |      |     |     |                                                                                                                                                                                                                                                                                                                                                                                                                                                    |           |          |           |           |          |        |
|-------------------------------------|------|-----|-----|----------------------------------------------------------------------------------------------------------------------------------------------------------------------------------------------------------------------------------------------------------------------------------------------------------------------------------------------------------------------------------------------------------------------------------------------------|-----------|----------|-----------|-----------|----------|--------|
| Diamant (2014a) <sup>(46-49)</sup>  | T2DM | NR  | NR  | NR                                                                                                                                                                                                                                                                                                                                                                                                                                                 |           |          |           |           |          |        |
| Diamant (2014b) <sup>(50,51)</sup>  | T2DM | NR  | Yes | Patients with a clinically significant history of cardiac disease with functional status that is Class III or IV (New York Heart Association Class III or IV)                                                                                                                                                                                                                                                                                      |           |          |           |           |          |        |
| Dobs (2013) <sup>(52)</sup>         | T2DM | NR  | Yes | Congestive heart failure (requiring pharmacological therapy or New York Heart Association Class II–IV)                                                                                                                                                                                                                                                                                                                                             |           |          |           |           |          |        |
| Dungan (2016) <sup>(53,54)</sup>    | T2DM | NR  | NR  | NR                                                                                                                                                                                                                                                                                                                                                                                                                                                 |           |          |           |           |          |        |
| Ferdinand (2014) <sup>(55)</sup>    | T2DM | NR  | Yes | A recent (<3 months) major cardiovascular event, mean seated HR<60 or >100 bpm, history of tachyarrhythmia                                                                                                                                                                                                                                                                                                                                         |           |          |           |           |          |        |
| Ferrannini (2009) <sup>(56)</sup>   | T2DM | Yes | Yes | Serious cardiac conditions (history of torsades de pointes or ventricular tachycardia; percutaneous coronary intervention in the past 3 months; myocardial infarction, coronary artery bypass surgery, unstable angina or stroke in the past 6 months; congestive heart failure requiring pharmacological treatment; second- or third-degree atrioventricular block or prolonged QTc)                                                              | 2308/2789 | 454/2789 | 1856/2789 | 1384/2789 | 541/2789 |        |
| Filozof (2010) <sup>(57)</sup>      | T2DM | Yes | Yes | Serious cardiac conditions (torsades de pointes, sustained and clinically relevant ventricular tachycardia or ventricular fibrillation, percutaneous coronary intervention within the past 3 months, myocardial infarction, coronary artery bypass surgery, unstable angina; or stroke within the last 6 months and congestive heart failure requiring pharmacological treatment, second- or third-degree atrioventricular block or prolonged QTc) | 534/1007  |          |           |           |          |        |
| Fonseca (2007) <sup>(58)</sup>      | T2DM | NR  | Yes | Serious cardiac conditions                                                                                                                                                                                                                                                                                                                                                                                                                         |           |          |           |           |          |        |
| Forst (2015) <sup>(59)</sup>        | T2DM | NR  | Yes | Serious cardiac conditions                                                                                                                                                                                                                                                                                                                                                                                                                         |           |          |           |           |          |        |
| Frederich (2012) <sup>(60,61)</sup> | T2DM | Yes | Yes | Cardiovascular event within 6 months prior to study entry or New York Heart Association stage III/IV congestive heart failure and/or known left ventricular ejection fraction $\leq$ 40%                                                                                                                                                                                                                                                           |           |          | 212/365   | 64/365    | 32/365   | 19/365 |
| Frías (2016) <sup>(62)</sup>        | T2DM | NR  | NR  | NR                                                                                                                                                                                                                                                                                                                                                                                                                                                 |           |          |           |           |          |        |
| Gallwitz (2012a) <sup>(63,64)</sup> | T2DM | NR  | Yes | Myocardial infarction, stroke, or transient ischemic attack in the 6 months before screening                                                                                                                                                                                                                                                                                                                                                       |           |          |           |           |          |        |

|                                        |      |     |     |                                                                                                                                                                                                                                                            |        |         |         |
|----------------------------------------|------|-----|-----|------------------------------------------------------------------------------------------------------------------------------------------------------------------------------------------------------------------------------------------------------------|--------|---------|---------|
| Gallwitz<br>(2012b) <sup>(65,66)</sup> | T2DM | NR  | NR  | NR                                                                                                                                                                                                                                                         |        |         |         |
| Gao (2009)<br>(67,68)                  | T2DM | NR  | NR  | NR                                                                                                                                                                                                                                                         |        |         |         |
| Garber (2008)<br>(69)                  | T2DM | NR  | Yes | Myocardial infarction, unstable angina or coronary artery bypass surgery within the previous 6 months. Congestive heart failure (New York Heart Association class III or IV)                                                                               |        |         |         |
| Garber (2009)<br>(70,71)               | T2DM | NR  | NR  | NR                                                                                                                                                                                                                                                         |        |         |         |
| Giorgino (2015)<br>(72)                | T2DM | NR  | NR  | NR                                                                                                                                                                                                                                                         |        |         |         |
| Goke (2013)<br>(73-75)                 | T2DM | NR  | NR  | NR                                                                                                                                                                                                                                                         |        |         |         |
| Goodman<br>(2009) <sup>(76)</sup>      | T2DM | NR  | NR  | NR                                                                                                                                                                                                                                                         |        |         |         |
| Gough (2014)<br>(77)                   | T2DM | NR  | NR  | NR                                                                                                                                                                                                                                                         |        |         |         |
| Grunberger<br>(2012) <sup>(78)</sup>   | T2DM | NR  | Yes | Serious cardiovascular condition                                                                                                                                                                                                                           |        |         |         |
| Haak (2012)<br>(79,80)                 | T2DM | NR  | Yes | A myocardial infarction, stroke or transient ischemic attack in the previous 6 months; had unstable or acute congestive heart failure                                                                                                                      |        |         |         |
| Hartley (2015)<br>(81)                 | T2DM | NR  | Yes | Recent history of cardiovascular disease (acute coronary syndrome, coronary artery intervention, New York Heart Association Class III/ IV heart failure, stroke, transient ischemic neurologic event, or new/worsening symptoms of coronary heart disease) |        |         |         |
| Henry (2011)<br>(82)                   | T2DM | NR  | Yes | Unstable condition or serious cardiovascular                                                                                                                                                                                                               |        |         |         |
| Henry (2012)<br>(83)                   | T2DM | Yes | Yes | Clinically significant cardiac disease within the past 6 months abnormalities in clinical laboratory tests or electrocardiogram                                                                                                                            | 35/313 | 197/313 | 176/313 |
| Henry (2014)<br>(84,85)                | T2DM | NR  | Yes | Recent (within the past 6 months) acute coronary syndrome (myocardial infarction or unstable angina),coronary artery intervention, stroke, or transient ischemic neurological disorder                                                                     |        |         |         |
| Hermans (2012)<br>(86,87)              | T2DM | NR  | NR  | NR                                                                                                                                                                                                                                                         |        |         |         |
| Hirose (2015)<br>(88,89)               | T2DM | NR  | Yes | Congestive heart failure (New York Heart Association Class III or IV), myocardial infarction, stroke or ischemic attacks in past 6 months                                                                                                                  |        |         |         |
| Hollander                              | T2DM | NR  | Yes | A cardiovascular event within 6 months before study entry or New                                                                                                                                                                                           |        |         |         |

|                                       |      |     |     |                                                                                                                                                                                                                                                       |        |         |         |
|---------------------------------------|------|-----|-----|-------------------------------------------------------------------------------------------------------------------------------------------------------------------------------------------------------------------------------------------------------|--------|---------|---------|
| (2011) <sup>(90-92)</sup>             |      |     |     | York Heart Association stage III/IV congestive heart failure and/or known left ventricular ejection fraction of 40% or less                                                                                                                           |        |         |         |
| Hollander (2013) <sup>(93)</sup>      | T2DM | Yes | Yes | Myocardial infarction, coronary artery bypass or stroke within the past 6 months, abnormalities in clinical laboratory tests or electrocardiogram, blood pressure >170/105 mm Hg                                                                      | 65/292 | 211/292 | 137/292 |
| Home (2015) <sup>(94)</sup>           | T2DM | Yes | Yes | Recent clinically significant cardiovascular disease                                                                                                                                                                                                  |        |         | 28/663  |
| Idorn (2015) <sup>(95)</sup>          | T2DM | Yes | NR  | NR                                                                                                                                                                                                                                                    | 27/40  |         |         |
| Inagaki (2012) <sup>(96,97)</sup>     | T2DM | NR  | NR  | NR                                                                                                                                                                                                                                                    |        |         |         |
| Iwamoto (2010) <sup>(98)</sup>        | T2DM | NR  | Yes | Congestive heart failure requiring pharmacological treatment, myocardial infarction, unstable angina, or coronary artery bypass surgery within 1 year                                                                                                 |        |         |         |
| Kadowaki (2009) <sup>(99)</sup>       | T2DM | NR  | Yes | Hospitalization for cardiac disease                                                                                                                                                                                                                   |        |         |         |
| Kadowaki (2011) <sup>(100,101)</sup>  | T2DM | NR  | NR  | NR                                                                                                                                                                                                                                                    |        |         |         |
| Kadowaki (2013a) <sup>(102)</sup>     | T2DM | NR  | Yes | Unstable cardiovascular disease or uncontrolled severe hypertension, or body mass index (BMI) <18 or >40 kg/m <sup>2</sup>                                                                                                                            |        |         |         |
| Kadowaki (2013b) <sup>(103,104)</sup> | T2DM | NR  | NR  | NR                                                                                                                                                                                                                                                    |        |         |         |
| Kadowaki (2013c) <sup>(105,106)</sup> | T2DM | NR  | NR  | NR                                                                                                                                                                                                                                                    |        |         |         |
| Kadowaki (2014) <sup>(107)</sup>      | T2DM | NR  | NR  | NR                                                                                                                                                                                                                                                    |        |         |         |
| Kaku (2010) <sup>(108)</sup>          | T2DM | NR  | Yes | Significant cardiovascular disease (heart failure, coronary artery disease or uncontrolled hypertension)                                                                                                                                              |        |         |         |
| Kaku (2016) <sup>(109)</sup>          | T2DM | NR  | NR  | NR                                                                                                                                                                                                                                                    |        |         |         |
| Kawamori (2012) <sup>(110-112)</sup>  | T2DM | Yes | Yes | Myocardial infarction, stroke or transient ischemic attack within the previous 6 months                                                                                                                                                               |        | 294/313 |         |
| Kikuchi (2009) <sup>(113)</sup>       | T2DM | NR  | Yes | Myocardial infarction, unstable angina or coronary artery bypass surgery within the previous 6 months. Congestive heart failure NYHA Class II, III or IV and liver disease such as cirrhosis or chronic active hepatitis also precluded participation |        |         |         |
| Kikuchi (2010) <sup>(114)</sup>       | T2DM | NR  | Yes | Myocardial infarction, unstable angina or coronary artery bypass surgery within the past 52 weeks, congestive heart failure (New York Heart Association Class III or IV)                                                                              |        |         |         |

|                                              |      |    |     |                                                                                                                                                                                                                                                                                               |
|----------------------------------------------|------|----|-----|-----------------------------------------------------------------------------------------------------------------------------------------------------------------------------------------------------------------------------------------------------------------------------------------------|
| Kim (2015) <sup>(115)</sup>                  | T2DM | NR | Yes | Cardiovascular significant comorbidities                                                                                                                                                                                                                                                      |
| Kim (2016) <sup>(116)</sup>                  | T2DM | NR | Yes | Myocardial infarction, unstable angina, stroke, congestive heart failure (all New York Heart Association classes I to IV)                                                                                                                                                                     |
| Kobayashi (2014) <sup>(117)</sup>            | T2DM | NR | Yes | A diagnosis of stroke, myocardial infarction, or other severe cardiovascular complications requiring hospitalization within the past 6 months                                                                                                                                                 |
| Kothny (2013) <sup>(118)</sup>               | T2DM | NR | Yes | A myocardial infarction, coronary artery bypass surgery, percutaneous coronary intervention, stroke or transient ischemic attack within the previous 6 months, unstable angina within the previous 3 months or a current heart failure diagnosis (New York Heart Association class III or IV) |
| Lavalle-Gonzalez (2013) <sup>(119,120)</sup> | T2DM | NR | Yes | Cardiovascular disease (including myocardial infarction, unstable angina, revascularization procedure or cerebrovascular accident) in the 3 months before screening or uncontrolled hypertension                                                                                              |
| Liutkus (2010) <sup>(121)</sup>              | T2DM | NR | NR  | NR                                                                                                                                                                                                                                                                                            |
| Lukashevich (2011) <sup>(122,123)</sup>      | T2DM | NR | Yes | Significant cardiovascular history within 6 months                                                                                                                                                                                                                                            |
| Lukashevich (2014) <sup>(124)</sup>          | T2DM | NR | Yes | Significant cardiovascular medical conditions                                                                                                                                                                                                                                                 |
| Macauley (2015) <sup>(125)</sup>             | T2DM | NR | NR  | NR                                                                                                                                                                                                                                                                                            |
| Marre (2009) <sup>(126)</sup>                | T2DM | NR | NR  | NR                                                                                                                                                                                                                                                                                            |
| Mathieu (2014) <sup>(127)</sup>              | T2DM | NR | Yes | Stroke; heart failure New York Heart Association class III or IV; myocardial infarction; unstable angina pectoris; or coronary arterial bypass graft or angioplasty within the last 24 weeks                                                                                                  |
| Mathieu (2015) <sup>(128,129)</sup>          | T2DM | NR | Yes | A history of significant and active cardiovascular disease                                                                                                                                                                                                                                    |
| Matthaei (2015) <sup>(130,131)</sup>         | T2DM | NR | Yes | Cardiovascular disease within 3 months of screening                                                                                                                                                                                                                                           |
| Miyagawa (2015) <sup>(132)</sup>             | T2DM | NR | NR  | NR                                                                                                                                                                                                                                                                                            |
| Moretto (2008) <sup>(133)</sup>              | T2DM | NR | Yes | Presence of clinically significant cardiac disease within the year                                                                                                                                                                                                                            |
| Mori (2016) <sup>(134)</sup>                 | T2DM | NR | NR  | NR                                                                                                                                                                                                                                                                                            |
| Moses (2016) <sup>(135)</sup>                | T2DM | NR | Yes | They had a significant cardiovascular disorder within the prior 3 months                                                                                                                                                                                                                      |

|                                            |      |     |     |                                                                                                                                                                                                                                               |          |          |
|--------------------------------------------|------|-----|-----|-----------------------------------------------------------------------------------------------------------------------------------------------------------------------------------------------------------------------------------------------|----------|----------|
| Nauck (2007)<br>(136,137)                  | T2DM | NR  | NR  | NR                                                                                                                                                                                                                                            |          |          |
| Nauck (2009)<br>(138,139)                  | T2DM | NR  | Yes | New York Heart Association Class III or IV heart failure; or history of coronary angioplasty, coronary stent placement, coronary bypass surgery or myocardial infarction within 6 months                                                      |          |          |
| Nauck (2013a)<br>(140,141)                 | T2DM | NR  | NR  | NR                                                                                                                                                                                                                                            |          |          |
| Nauck (2013b)<br>(142)                     | T2DM | Yes | Yes | Myocardial infarction or stroke within 6 months, recent unstable hypertension                                                                                                                                                                 | 759/1028 | 586/1028 |
| Nauck (2014)<br>(143,144)                  | T2DM | NR  | NR  | NR                                                                                                                                                                                                                                            |          |          |
| Nauck (2016)<br>(145)                      | T2DM | Yes | Yes | Recent cardiovascular and/or cerebrovascular disease                                                                                                                                                                                          |          | 9/301    |
| NCT00086515<br>(2010) <sup>(146,147)</sup> | T2DM | NR  | NR  | NR                                                                                                                                                                                                                                            |          |          |
| NCT00095056<br>(2010) <sup>(148)</sup>     | T2DM | NR  | Yes | Patient has had heart problems (such as a heart attack or chest pain) or stroke within the past 6 months or any condition                                                                                                                     |          |          |
| NCT00106704<br>(2010) <sup>(149,150)</sup> | T2DM | NR  | NR  | NR                                                                                                                                                                                                                                            |          |          |
| NCT00289848<br>(2010) <sup>(151,152)</sup> | T2DM | NR  | Yes | Unstable cardiac disease                                                                                                                                                                                                                      |          |          |
| NCT00305604<br>(2009) <sup>(153,154)</sup> | T2DM | NR  | Yes | A recent change in cardiovascular status (such as acute coronary syndrome, coronary artery intervention, worsening congestive heart failure, stroke, a transient ischemic neurologic event, or worsening symptoms of coronary artery disease) |          |          |
| NCT00337610<br>(2009) <sup>(155,156)</sup> | T2DM | NR  | NR  | NR                                                                                                                                                                                                                                            |          |          |
| NCT00511108<br>(2010) <sup>(157,158)</sup> | T2DM | NR  | Yes | A significant cardiovascular disorder                                                                                                                                                                                                         |          |          |
| NCT00655863<br>(2013) <sup>(159,160)</sup> | T2DM | NR  | Yes | Any coronary interventions or history of myocardial infarction within the past 6 months                                                                                                                                                       |          |          |
| NCT00707993<br>(2013) <sup>(161,162)</sup> | T2DM | NR  | Yes | History of coronary angioplasty, coronary stent placement, coronary bypass surgery, or myocardial infarction within the 6 months prior to Screening                                                                                           |          |          |
| NCT00713830<br>(2016) <sup>(163)</sup>     | T2DM | NR  | Yes | Patients with history of myocardial infarction, stroke, or heart failure requiring hospitalization                                                                                                                                            |          |          |
| NCT00715624<br>(2016) <sup>(164)</sup>     | T2DM | NR  | Yes | Patients with cardiovascular disease                                                                                                                                                                                                          |          |          |
| NCT00800683<br>(2011) <sup>(165)</sup>     | T2DM | NR  | Yes | Myocardial infarction, stroke or transient ischemic attack within 6 months prior to informed consent,                                                                                                                                         |          |          |



|                                            |      |    |     |                                                                                                                                                                                                                                                                                       |
|--------------------------------------------|------|----|-----|---------------------------------------------------------------------------------------------------------------------------------------------------------------------------------------------------------------------------------------------------------------------------------------|
|                                            |      |    |     | unstable or acute congestive heart failure                                                                                                                                                                                                                                            |
| NCT00819091<br>(2011) <sup>(166,167)</sup> | T2DM | NR | Yes | A myocardial infarction, stroke, or transient ischemic attack in the previous 6 months; unstable or acute congestive heart failure                                                                                                                                                    |
| NCT00839527<br>(2014) <sup>(168)</sup>     | T2DM | NR | Yes | Current symptomatic heart failure (NYHA Class II-IV)                                                                                                                                                                                                                                  |
| NCT00881530<br>(2014) <sup>(169,170)</sup> | T2DM | NR | NR  | NR                                                                                                                                                                                                                                                                                    |
| NCT01075282<br>(2014) <sup>(171)</sup>     | T2DM | NR | Yes | History of Heart Failure New York Heart Classification III or IV, or acute myocardial infarction, or stroke within 2 months of screening                                                                                                                                              |
| NCT01318083<br>(2011) <sup>(172,173)</sup> | T2DM | NR | Yes | Serious cardiovascular disorders                                                                                                                                                                                                                                                      |
| NCT01644500<br>(2015) <sup>(174)</sup>     | T2DM | NR | Yes | Have cardiac disorder defined as unstable angina, myocardial infarction, coronary artery bypass graft surgery, percutaneous coronary intervention, heart failure, arrhythmia, transient ischemic attack, or stroke                                                                    |
| NCT01648582<br>(2015) <sup>(175)</sup>     | T2DM | NR | Yes | Have cardiac disorder defined as unstable angina, myocardial infarction, coronary artery bypass graft surgery, percutaneous coronary intervention, heart failure, arrhythmia, transient ischemic attack, or stroke                                                                    |
| NCT01682759<br>(2016) <sup>(176)</sup>     | T2DM | NR | Yes | Patients with new or worsening coronary heart disease, congestive heart failure, myocardial infarction, unstable angina, coronary artery intervention, stroke or transient ischemic neurological disorder within the past 3 months                                                    |
| NCT01717313<br>(2016) <sup>(177)</sup>     | T2DM | NR | Yes | Patients with new or worsening coronary heart disease or congestive heart failure within the past 3 months, or has any of the following disorders within the past 3 months: acute coronary syndrome, coronary artery intervention, stroke or transient ischemic neurological disorder |
| NCT01778049<br>(2016) <sup>(178)</sup>     | T2DM | NR | Yes | Acute coronary syndrome and stroke within 3 months of informed consent                                                                                                                                                                                                                |
| NCT01890122<br>(2016) <sup>(179)</sup>     | T2DM | NR | Yes | Patients with heart failure, history of coronary angioplasty, coronary stent placement, coronary bypass surgery, or myocardial infarction within 6 months prior to Screening                                                                                                          |
| Ning (2016) <sup>(180)</sup>               | T2DM | NR | Yes | Congestive heart failure (New York Heart Association Class III or IV)                                                                                                                                                                                                                 |

|                                              |                                                           |     |     |                                                                                                                                                                                            |        |       |         |         |        |         |        |        |
|----------------------------------------------|-----------------------------------------------------------|-----|-----|--------------------------------------------------------------------------------------------------------------------------------------------------------------------------------------------|--------|-------|---------|---------|--------|---------|--------|--------|
| Nowicki (2011)<br>(181-183)                  | T2DM                                                      | NR  | NR  | NR                                                                                                                                                                                         |        |       |         |         |        |         |        |        |
| Odawara (2014)<br>(184)                      | T2DM                                                      | NR  | Yes | Congestive heart failure (New York Heart Association Class III or IV), myocardial infarction, stroke or transient ischemic attacks in the past 6 months                                    |        |       |         |         |        |         |        |        |
| Oe (2015) <sup>(185)</sup>                   | T2DM patients with left ventricular diastolic dysfunction | Yes | Yes | Myocardial infarction or stroke within the previous 24 weeks, significant left ventricular hypertrophy, atrial fibrillation at baseline                                                    |        | 10/80 | 69/80   |         | 7/80   |         |        |        |
| Oyama (2016)<br>(186)                        | T2DM                                                      | NR  | Yes | Patients with heart failure and a history of myocardial infarction, angina pectoris, percutaneous transluminal coronary angioplasty, or bypass surgery                                     |        |       | 347/442 | 311/442 | 41/442 | 101/442 | 57/442 | 35/442 |
| Pan (2008) <sup>(187)</sup>                  | T2DM                                                      | Yes | Yes | Myocardial infarction, unstable angina or coronary artery bypass surgery within the previous 6 months. Congestive heart failure, New York Heart Association Class III or IV                | 83/661 |       |         |         |        |         |        |        |
| Pan (2012)<br>(188,189)                      | T2DM                                                      | NR  | Yes | New York Heart Association class III or IV congestive heart failure or left ventricular ejection fraction of $\leq 40\%$ , or a significant cardiovascular history within 6 months         |        |       |         |         |        |         |        |        |
| Pan (2016) <sup>(190)</sup>                  | T2DM                                                      | NR  | Yes | New York Heart Association Class III or IV heart failure or a history of coronary angioplasty, coronary stent placement, coronary bypass surgery or myocardial infarction within 6 months  |        |       |         |         |        |         |        |        |
| Perez-Monteverde (2011) <sup>(191,192)</sup> | T2DM                                                      | NR  | NR  | NR                                                                                                                                                                                         |        |       |         |         |        |         |        |        |
| Pfutzner (2011)<br>(193-195)                 | T2DM                                                      | NR  | Yes | Cardiovascular event within 6 months before study entry or New York Heart Association stage III/IV congestive heart failure and/or known left ventricular ejection fraction $\leq 40\%$    |        |       |         |         |        |         |        |        |
| Pinget (2013)<br>(196)                       | T2DM                                                      | NR  | NR  | NR                                                                                                                                                                                         |        |       |         |         |        |         |        |        |
| Pratley (2006)<br>(197)                      | T2DM                                                      | NR  | Yes | Clinically significant cardiovascular abnormalities                                                                                                                                        |        |       |         |         |        |         |        |        |
| Pratley (2009a)<br>(198,199)                 | T2DM                                                      | NR  | Yes | They had active heart failure (New York Heart Association Class III or IV) or had undergone an invasive coronary procedure or had a myocardial infarction within 6 months before screening |        |       |         |         |        |         |        |        |
| Pratley (2009b)<br>(200,201)                 | T2DM                                                      | NR  | Yes | New York Heart Association classes III or IV heart failure; a history of coronary angioplasty, coronary stent placement, coronary bypass surgery, or myocardial infarction within 6        |        |       |         |         |        |         |        |        |

|                                         |                                             |     |     | months                                                                                                                                                                                                      |    |         |
|-----------------------------------------|---------------------------------------------|-----|-----|-------------------------------------------------------------------------------------------------------------------------------------------------------------------------------------------------------------|----|---------|
| Pratley (2013)<br>(202)                 | T2DM                                        | NR  | Yes | Clinically relevant QTc prolongation (e.g. QTc >480ms) or family history of Long QT Syndrome                                                                                                                |    |         |
| Pratley (2014)<br>(203,204)             | T2DM                                        | NR  | Yes | Heart failure (New York Heart Association Class III-IV); coronary angioplasty, stent placement, bypass surgery or myocardial infarction within 3 months of screening                                        |    |         |
| Probstfield (2016) <sup>(205)</sup>     | T2DM patients with high cardiovascular risk | Yes | Yes | Patients with current symptomatic heart failure, history of New York Heart Association Functional Classification III or IV congestive heart failure at any time or left ventricular ejection fraction < 25% |    |         |
| Raz (2012) <sup>(206)</sup>             | T2DM                                        | NR  | Yes | Cardiac disease within the past 6 months                                                                                                                                                                    |    |         |
| Reasner (2011)<br>(207-209)             | T2DM                                        | NR  | Yes | Unstable cardiac disease                                                                                                                                                                                    |    |         |
| Riddle (2013)<br>(210)                  | T2DM                                        | Yes | NR  | NR                                                                                                                                                                                                          | NR | 297/495 |
| Roden (2015)<br>(211-213)               | T2DM                                        | NR  | NR  | NR                                                                                                                                                                                                          |    |         |
| Rosenstock (2008) <sup>(214,215)</sup>  | T2DM                                        | NR  | Yes | Congestive heart failure, recent cardiovascular illness                                                                                                                                                     |    |         |
| Rosenstock (2009) <sup>(216,217)</sup>  | T2DM                                        | NR  | Yes | Coronary angioplasty, coronary stent placement, coronary bypass surgery or myocardial infarction within the previous 6 months. New York Heart Association class III or IV heart failure                     |    |         |
| Rosenstock (2013a) <sup>(218-220)</sup> | T2DM                                        | NR  | NR  | NR                                                                                                                                                                                                          |    |         |
| Rosenstock (2013b) <sup>(221,222)</sup> | T2DM                                        | NR  | Yes | History of myocardial infarction, stroke or transient ischemic attack within 6 months                                                                                                                       |    |         |
| Rosenstock (2014) <sup>(223)</sup>      | T2DM                                        | NR  | Yes | History of myocardial infarction, stroke, or heart failure requiring hospitalization within the previous 6 months                                                                                           |    |         |
| Rosenstock (2015) <sup>(224)</sup>      | T2DM                                        | NR  | Yes | Cardiovascular disease within 3 months of screening, congestive heart failure (New York Heart Association functional class IV)                                                                              |    |         |
| Rosenstock (2016a) <sup>(225)</sup>     | T2DM                                        | NR  | NR  | NR                                                                                                                                                                                                          |    |         |
| Rosenstock (2016b) <sup>(226,227)</sup> | T2DM                                        | NR  | NR  | NR                                                                                                                                                                                                          |    |         |
| Ross (2012)<br>(228,229)                | T2DM                                        | NR  | Yes | A major cardiovascular event (myocardial infarction, stroke or transient ischemic attack) within the previous six months                                                                                    |    |         |
| Russell-Jones (2012) <sup>(230)</sup>   | T2DM                                        | NR  | NR  | NR                                                                                                                                                                                                          |    |         |

|                                          |      |     |     |                                                                                                                                                                                                      |         |         |         |        |        |        |        |  |
|------------------------------------------|------|-----|-----|------------------------------------------------------------------------------------------------------------------------------------------------------------------------------------------------------|---------|---------|---------|--------|--------|--------|--------|--|
| Scherbaum (2008) <sup>(231,232)</sup>    | T2DM | Yes | Yes | A history of significant cardiac arrhythmia, congestive heart failure, New York Heart Association Class III or IV or liver disease such as cirrhosis                                                 | 83/131  |         |         |        |        |        |        |  |
| Schernthaner (2013) <sup>(233,234)</sup> | T2DM | NR  | Yes | Cardiovascular disease                                                                                                                                                                               |         |         |         |        |        |        |        |  |
| Schernthaner (2015) <sup>(235,236)</sup> | T2DM | Yes | NR  | NR                                                                                                                                                                                                   | 317/720 | 555/720 | 433/720 | 40/720 | 54/720 | 67/720 | 38/720 |  |
| Schweizer (2007) <sup>(237)</sup>        | T2DM | NR  | Yes | Congestive heart failure requiring pharmacological treatment, or myocardial infarction, unstable angina, or coronary artery bypass surgery within the previous 6 months                              |         |         |         |        |        |        |        |  |
| Schweizer (2009) <sup>(238)</sup>        | T2DM | Yes | Yes | Congestive heart failure requiring pharmacological treatment or myocardial infarction, unstable angina or stroke or coronary artery bypass surgery within the past 6 months                          | 138/335 |         |         |        |        |        |        |  |
| Seck (2010) <sup>(239-241)</sup>         | T2DM | NR  | NR  | NR                                                                                                                                                                                                   |         |         |         |        |        |        |        |  |
| Seino (2010) <sup>(242-244)</sup>        | T2DM | NR  | Yes | Significant cardiovascular disease (heart failure, coronary artery disease or uncontrolled hypertension)                                                                                             |         |         |         |        |        |        |        |  |
| Seino (2011) <sup>(245,246)</sup>        | T2DM | NR  | Yes | Serious cardiovascular disorders                                                                                                                                                                     |         |         |         |        |        |        |        |  |
| Seino (2012a) <sup>(247,248)</sup>       | T2DM | NR  | Yes | Patients with severe cardiovascular function impairment                                                                                                                                              |         |         |         |        |        |        |        |  |
| Seino (2012b) <sup>(249)</sup>           | T2DM | NR  | Yes | History within the previous 6 months of myocardial infarction, stroke or heart failure requiring hospitalization                                                                                     |         |         |         |        |        |        |        |  |
| Seino (2014) <sup>(250,251)</sup>        | T2DM | NR  | Yes | Cardiovascular/cerebrovascular disease                                                                                                                                                               |         |         |         |        |        |        |        |  |
| Seino (2016) <sup>(252)</sup>            | T2DM | NR  | NR  | NR                                                                                                                                                                                                   |         |         |         |        |        |        |        |  |
| Sheu (2015) <sup>(253)</sup>             | T2DM | NR  | Yes | A history of significant cardiovascular disease                                                                                                                                                      |         |         |         |        |        |        |        |  |
| Strain (2013) <sup>(254)</sup>           | T2DM | NR  | Yes | Myocardial infarction, coronary artery bypass surgery, or stroke within 6 months; unstable angina within 3 months; congestive heart failure (New York Heart Association classification of III or IV) |         |         |         |        |        |        |        |  |
| Tajima (2011) <sup>(255)</sup>           | T2DM | NR  | Yes | Unstable cardiovascular disease                                                                                                                                                                      |         |         |         |        |        |        |        |  |
| Terauchi (2014) <sup>(256)</sup>         | T2DM | NR  | NR  | NR                                                                                                                                                                                                   |         |         |         |        |        |        |        |  |
| Thrasher (2014) <sup>(257,258)</sup>     | T2DM | NR  | Yes | A history of myocardial infarction, stroke, or transient ischemic attack within 3 months before screening                                                                                            |         |         |         |        |        |        |        |  |

|                                             |                                                |                                                                                                                                      |     |                                                                                                                                                                                                                                                                                                                                              |                |                 |                |            |
|---------------------------------------------|------------------------------------------------|--------------------------------------------------------------------------------------------------------------------------------------|-----|----------------------------------------------------------------------------------------------------------------------------------------------------------------------------------------------------------------------------------------------------------------------------------------------------------------------------------------------|----------------|-----------------|----------------|------------|
| Umpierrez (2011) <sup>(259)</sup>           | T2DM                                           | NR                                                                                                                                   | Yes | Cardiovascular disorders                                                                                                                                                                                                                                                                                                                     |                |                 |                |            |
| Umpierrez (2014) <sup>(260)</sup>           | T2DM                                           | NR                                                                                                                                   | NR  | NR                                                                                                                                                                                                                                                                                                                                           |                |                 |                |            |
| Vilsboll (2010) <sup>(261)</sup>            | T2DM                                           | NR                                                                                                                                   | Yes | Unstable cardiac disease (including new or worsening signs or symptoms of coronary heart disease within 3 months of study entry or any of the following within 6 months of study entry: acute coronary syndrome, stroke or ischemic event; coronary artery intervention, or New York Heart Association Class II-IV congestive heart failure) |                |                 |                |            |
| Wang (2016) <sup>(262)</sup>                | T2DM                                           | NR                                                                                                                                   | Yes | Patients had experienced myocardial infarction, stroke, or transient ischemic attack $\leq 6$ months prior to informed consent; had unstable or acute congestive heart failure                                                                                                                                                               |                |                 |                |            |
| Weissman (2014) <sup>(263,264)</sup>        | T2DM                                           | Yes                                                                                                                                  | Yes | Recent significant cardiovascular (within 2 months) or cerebrovascular (within 1 month) events                                                                                                                                                                                                                                               | 532/745        |                 | 37/745         |            |
| White (2014) <sup>(265,266)</sup>           | T2DM                                           | NR                                                                                                                                   | Yes | A cardiovascular event within 3 months of screening, congestive heart failure New York Heart Association class III/IV, known ejection fraction $\leq 40\%$                                                                                                                                                                                   |                |                 |                |            |
| Williams-Herman (2010) <sup>(267-270)</sup> | T2DM                                           | NR                                                                                                                                   | Yes | Unstable cardiac disease                                                                                                                                                                                                                                                                                                                     |                |                 |                |            |
| Wysham (2014) <sup>(271,272)</sup>          | T2DM                                           | NR                                                                                                                                   | NR  | NR                                                                                                                                                                                                                                                                                                                                           |                |                 |                |            |
| Yang (2012) <sup>(273)</sup>                | T2DM                                           | NR                                                                                                                                   | Yes | Congestive heart failure, unstable coronary heart disease                                                                                                                                                                                                                                                                                    |                |                 |                |            |
| Yang (2015) <sup>(274)</sup>                | T2DM                                           | NR                                                                                                                                   | Yes | Patients with congestive heart failure (New York Heart Association Class III or IV)                                                                                                                                                                                                                                                          |                |                 |                |            |
| Yki-Jarvinen (2013) <sup>(275,276)</sup>    | T2DM                                           | NR                                                                                                                                   | Yes | A myocardial infarction, stroke, or transient ischemic attack within 6 months before informed consent                                                                                                                                                                                                                                        |                |                 |                |            |
| Yokoh (2015) <sup>(277)</sup>               | T2DM                                           | NR                                                                                                                                   | Yes | Myocardial infarction, or other severe cardiovascular complications requiring hospitalization within the past 6 months                                                                                                                                                                                                                       |                |                 |                |            |
| Yu Pan (2014) <sup>(278)</sup>              | T2DM                                           | NR                                                                                                                                   | NR  | NR                                                                                                                                                                                                                                                                                                                                           |                |                 |                |            |
| Zinman (2009) <sup>(279)</sup>              | T2DM                                           | NR                                                                                                                                   | NR  | NR                                                                                                                                                                                                                                                                                                                                           |                |                 |                |            |
| <b>Large cardiovascular outcomes trials</b> |                                                |                                                                                                                                      |     |                                                                                                                                                                                                                                                                                                                                              |                |                 |                |            |
| Green (2015) (TECOS) <sup>(280)</sup>       | T2DM patients with established or pre-existing | Yes, including patients who had established CVD (major coronary artery disease, ischemic cerebrovascular disease, or atherosclerotic | NR  | NR                                                                                                                                                                                                                                                                                                                                           | 7522/1473<br>5 | 10863/147<br>35 | 6255/1473<br>5 | 9378/14735 |

|                                                 |                                                                                                        |                                                                                                                                                                                                                                                                              |     |                                                                                                                                                                     |           |             |             |           |            |            |           |           |  |            |
|-------------------------------------------------|--------------------------------------------------------------------------------------------------------|------------------------------------------------------------------------------------------------------------------------------------------------------------------------------------------------------------------------------------------------------------------------------|-----|---------------------------------------------------------------------------------------------------------------------------------------------------------------------|-----------|-------------|-------------|-----------|------------|------------|-----------|-----------|--|------------|
|                                                 | CVD                                                                                                    | peripheral arterial disease) or were at least 50 years of age, with a glycated hemoglobin level of 6.5 to 8.0% when treated with stable doses of one or two oral anti-hyperglycemic agents (metformin, pioglitazone, or sulfonylurea) or insulin (with or without metformin) |     |                                                                                                                                                                     |           |             |             |           |            |            |           |           |  |            |
| Marso (2016) (LEADER) <sup>(281)</sup>          | T2DM patients with high CVD risk                                                                       | Yes, including patients with cardiovascular coexisting condition or cardiovascular risk factors                                                                                                                                                                              | Yes | The occurrence of an acute coronary or cerebrovascular event within 14 days before screening and randomisation                                                      |           | 9340/9340   | 1305/9340   | 2864/9340 |            |            |           |           |  | 3638/6068  |
| Marso (2016) (SUSTAIN-6) <sup>(282)</sup>       | T2DM patients with established cardiovascular disease, or with at least one cardiovascular risk factor | Yes, including patients with established cardiovascular disease, or with at least one cardiovascular risk factor                                                                                                                                                             | Yes | A history of an acute coronary or cerebrovascular event within 90 days before randomisation; planned revascularization of a coronary, carotid, or peripheral artery | 1804/3297 | 3059/3297   |             | 777/3297  | 1072/3297  | 491/3297   | 1994/3297 |           |  |            |
| Pfeffer (2015) (ELIXA) <sup>(283)</sup>         | T2DM patients with acute coronary syndrome                                                             | Yes, including patients with acute coronary syndrome                                                                                                                                                                                                                         | Yes | Coronary-artery bypass graft surgery for the qualifying event, planned coronary revascularization procedure within 90 days after screening                          | 709/6068  | 4635/6068   |             | 1358/6068 |            | 331/6068   | 818/6068  | 6068/6068 |  | 4586/6068  |
| Scirica (2013) (SAVOR-TIMI 53) <sup>(284)</sup> | T2DM patients who had a history of, or were at risk for, cardiovascular events                         | Yes, including patients with a history of established CVD or multiple risk factors for vascular disease                                                                                                                                                                      | NR  | NR                                                                                                                                                                  |           | 13492/16492 | 11739/16492 |           | 2105/16492 | 6237/16492 |           |           |  | 7123/16492 |
| White (2013) (EXAMINE) <sup>(285)</sup>         | T2DM patients with acute coronary syndrome                                                             | Yes, including patients with acute coronary syndrome                                                                                                                                                                                                                         | Yes | Unstable cardiac disorders (e.g., New York Heart Association class IV heart failure, refractory angina, uncontrolled arrhythmias, critical valvular heart disease)  | 367/5380  | 4469/5380   |             | 1501/5380 | 4734/5380  | 388/5380   |           | 5380/5380 |  | 4060/16492 |

T2DM=type 2 diabetes mellitus; CVD=cardiovascular disease; CV=cardiovascular; NR=not reported.

**Table C. Interventions tested and event rates in randomised controlled trials in patients with type 2 diabetes mellitus**

| Author (year)                             | Medications used across groups                                             | Incretin     |        | Control                                              |        | Duration of treatment (weeks) |
|-------------------------------------------|----------------------------------------------------------------------------|--------------|--------|------------------------------------------------------|--------|-------------------------------|
|                                           |                                                                            | Type         | Events | Type                                                 | Events |                               |
| <b>Smaller trials</b>                     |                                                                            |              |        |                                                      |        |                               |
| Ahren (2013) <sup>(1)</sup>               | Metformin                                                                  | Lixisenatide | 0/510  | Placebo                                              | 0/170  | 24                            |
| Ahren (2014) <sup>(2,3)</sup>             | Metformin                                                                  | Sitagliptin  | 0/302  | Placebo                                              | 0/101  | 164                           |
|                                           |                                                                            | Albiglutide  | 1/302  | Glimepiride                                          | 0/307  |                               |
| Amin (2015) <sup>(4)</sup>                | None                                                                       | Sitagliptin  | 0/55   | Placebo                                              | 0/54   | 12                            |
|                                           |                                                                            | Sitagliptin  | 0/55   | Ertugliflzin                                         | 0/219  |                               |
| Araki (2015) <sup>(5)</sup>               | SU ± biguanide                                                             | Dulaglutide  | 0/181  | Insulin glargine                                     | 0/180  | 26                            |
| Arechavaleta (2011) <sup>(6,7)</sup>      | Metformin                                                                  | Sitagliptin  | 0/516  | Glimepiride                                          | 1/518  | 30                            |
| Arjona Ferreira (2013a) <sup>(8)</sup>    | None                                                                       | Sitagliptin  | 4/64   | Glipizide                                            | 6/65   | 54                            |
| Arjona Ferreira (2013b) <sup>(9,10)</sup> | None                                                                       | Sitagliptin  | 3/210  | Glipizide                                            | 7/212  | 54                            |
| Aroda (2016) <sup>(11)</sup>              | Insulin glargine                                                           | Lixisenatide | 1/365  | No additional drugs                                  | 2/365  | 30                            |
| Aschner (2010) <sup>(12,13)</sup>         | None                                                                       | Sitagliptin  | 1/528  | Metformin                                            | 0/522  | 24                            |
| Ba (2016) <sup>(14)</sup>                 | SU ± metformin                                                             | Sitagliptin  | 0/248  | Placebo                                              | 0/249  | 24                            |
| Bajaj (2014) <sup>(15)</sup>              | Metformin + pioglitazone                                                   | Linagliptin  | 0/183  | Placebo                                              | 1/89   | 24                            |
| Barnett (2012) <sup>(16)</sup>            | None                                                                       | Linagliptin  | 1/151  | Placebo                                              | 0/76   | 52                            |
| Barnett (2013a) <sup>(17,18)</sup>        | Metformin, sulfonylureas, or basal insulin, or combinations of these drugs | Linagliptin  | 0/162  | Placebo                                              | 0/79   | 24                            |
| Barnett (2013b) <sup>(19-21)</sup>        | Insulin ± metformin                                                        | Saxagliptin  | 2/304  | Canagliflozin                                        | 0/151  | 52                            |
| Bergental (2009) <sup>(22)</sup>          | Metformin + SU                                                             | Exenatide    | 0/124  | Biphasic insulin aspart 70/30 (BIA <sub>sp</sub> 30) | 1/128  | 24                            |

|                                    |                                                                                     |              |       |                     |       |     |
|------------------------------------|-------------------------------------------------------------------------------------|--------------|-------|---------------------|-------|-----|
| Bergenstal (2012) <sup>(23)</sup>  | Metformin                                                                           | Sitagliptin  | 0/184 | Placebo             | 0/90  | 24  |
|                                    |                                                                                     | Taspoglutide | 0/379 | Placebo             | 0/90  |     |
| Blonde (2015) <sup>(24)</sup>      | Metformin                                                                           | Dulaglutide  | 2/588 | Glargine            | 3/296 | 52  |
| Bolli (2014) <sup>(25)</sup>       | Metformin                                                                           | Lixisenatide | 2/322 | Placebo             | 2/160 | ≥76 |
| Bosi (2007) <sup>(26)</sup>        | Metformin                                                                           | Vildagliptin | 0/360 | Placebo             | 0/181 | 24  |
|                                    | None                                                                                | Vildagliptin | 0/297 | Metformin           | 0/292 | 24  |
| Bosi (2009) <sup>(27)</sup>        | Metformin                                                                           | Vildagliptin | 1/292 | No additional drugs | 0/292 |     |
| Buse (2011) <sup>(28,29)</sup>     | Insulin glargine                                                                    | Exenatide    | 0/137 | Placebo             | 1/122 | 30  |
| Chacra (2011) <sup>(30-32)</sup>   | Glyburide                                                                           | Saxagliptin  | 1/501 | Placebo             | 4/267 | 76  |
| Davies (2012) <sup>(33)</sup>      | None                                                                                | Exenatide    | 0/111 | Insulin detemir     | 0/105 | 26  |
| Davies (2015) <sup>(34,35)</sup>   | None                                                                                | Liraglutide  | 1/632 | Placebo             | 0/212 | 68  |
| Davies (2016) <sup>(36)</sup>      | Monotherapy or dual-therapy combinations of metformin and/or SU and/or pioglitazone | Liraglutide  | 4/140 | Placebo             | 1/137 | 26  |
| DeFronzo (2008) <sup>(37,38)</sup> | None                                                                                | Alogliptin   | 0/264 | Placebo             | 0/64  | 26  |
| DeFronzo (2009) <sup>(39,40)</sup> | Metformin                                                                           | Saxagliptin  | 1/564 | Placebo             | 2/179 | 206 |
| DeFronzo (2012) <sup>(41)</sup>    | Metformin                                                                           | Alogliptin   | 0/257 | Placebo             | 0/129 | 26  |
|                                    | Metformin + pioglitazone                                                            | Alogliptin   | 0/780 | No additional drugs | 1/387 |     |
| DeFronzo (2015) <sup>(42,43)</sup> | Metformin + empagliflozin                                                           | Linagliptin  | 1/269 | No additional drugs | 1/277 | 52  |
|                                    | Empagliflozin                                                                       | Linagliptin  | 1/272 | No additional drugs | 4/270 |     |



|                                     |                              |              |        |                     |        |     |
|-------------------------------------|------------------------------|--------------|--------|---------------------|--------|-----|
| Del Prato (2014) <sup>(44,45)</sup> | Metformin                    | Alogliptin   | 6/1751 | Glipizide           | 5/869  | 104 |
| Diamant (2014a) <sup>(46-49)</sup>  | Metformin ± SU               | Exenatide    | 1/233  | Insulin glargine    | 1/223  | 156 |
| Diamant (2014b) <sup>(50,51)</sup>  | Insulin glargine + metformin | Exenatide    | 1/315  | Insulin lispro      | 0/312  | 30  |
| Dobs (2013) <sup>(52)</sup>         | Rosiglitazone + metformin    | Sitagliptin  | 0/170  | Placebo             | 0/92   | 54  |
| Dungan (2016) <sup>(53,54)</sup>    | glimepiride                  | Dulaglutide  | 1/239  | Placebo             | 0/60   | 24  |
| Ferdinand (2014) <sup>(55)</sup>    | None                         | Dulaglutide  | 0/505  | Placebo             | 0/250  | 26  |
| Ferrannini (2009) <sup>(56)</sup>   | Metformin                    | Vildagliptin | 2/1389 | Glimepiride         | 3/1383 | 52  |
| Filozof (2010) <sup>(57)</sup>      | Metformin                    | Vildagliptin | 1/510  | Glimepiride         | 1/493  | 52  |
| Fonseca (2007) <sup>(58)</sup>      | Insulin                      | Vildagliptin | 1/144  | Placebo             | 1/152  | 24  |
| Forst (2015) <sup>(59)</sup>        | Glimepiride                  | Vildagliptin | 0/82   | NPH insulin         | 1/79   | 24  |
| Frederich (2012) <sup>(60,61)</sup> | None                         | Saxagliptin  | 2/291  | Placebo             | 0/74   | 76  |
| Frías (2016) <sup>(62)</sup>        | Metformin + dapagliflozin    | Exenatide    | 3/231  | No additional drugs | 1/233  | 28  |
|                                     | Metformin                    | Exenatide    | 1/230  | Dapagliflozin       | 1/233  |     |
| Gallwitz (2012a) <sup>(63,64)</sup> | Metformin                    | Linagliptin  | 4/776  | Glimepiride         | 4/775  | 105 |
| Gallwitz (2012b) <sup>(65,66)</sup> | Metformin                    | Exenatide    | 5/511  | Glimepiride         | 5/508  | 234 |
| Gao (2009) <sup>(67,68)</sup>       | Metformin ± SU               | Exenatide    | 0/234  | Placebo             | 0/231  | 16  |
| Garber (2008) <sup>(69)</sup>       | Glimepiride                  | Vildagliptin | 0/339  | Placebo             | 0/176  | 24  |
| Garber (2009) <sup>(70,71)</sup>    | None                         | Liraglutide  | 0/497  | Glimepiride         | 1/248  | 52  |
| Giorgino (2015) <sup>(72)</sup>     | Metformin + glimepiride      | Dulaglutide  | 1/545  | Insulin Glargine    | 2/262  | 78  |
| Goke (2013) <sup>(73-75)</sup>      | Metformin                    | Saxagliptin  | 4/428  | Glipizide           | 2/430  | 104 |
| Goodman (2009) <sup>(76)</sup>      | Metformin                    | Vildagliptin | 0/248  | Placebo             | 0/122  | 24  |

|                                       |                          |               |       |                                          |       |    |
|---------------------------------------|--------------------------|---------------|-------|------------------------------------------|-------|----|
| Gough (2014) <sup>(77)</sup>          | Metformin + pioglitazone | Liraglutide   | 0/412 | Insulin degludec                         | 0/412 | 26 |
| Grunberger (2012) <sup>(78)</sup>     | Metformin                | Dulaglutide   | 0/132 | Placebo                                  | 0/32  | 12 |
| Haak (2012) <sup>(79,80)</sup>        | None                     | Linagliptin   | 0/142 | Placebo                                  | 0/72  | 24 |
|                                       | Metformin                | Linagliptin   | 0/286 | No additional drugs                      | 1/291 |    |
| Hartley (2015) <sup>(81)</sup>        | None                     | Sitagliptin   | 0/241 | Glimepiride                              | 0/236 | 32 |
| Henry (2011) <sup>(82)</sup>          | None                     | Saxagliptin   | 0/20  | Placebo                                  | 0/16  | 12 |
| Henry (2012) <sup>(83)</sup>          | Metformin + pioglitazone | Taspoglutide  | 0/223 | Placebo                                  | 0/101 | 24 |
| Henry (2014) <sup>(84,85)</sup>       | Pioglitazone             | Sitagliptin   | 3/581 | No additional drugs                      | 1/565 | 54 |
| Hermans (2012) <sup>(86,87)</sup>     | Metformin 1500 mg        | Saxagliptin   | 1/147 | Metformin 500 mg,<br>once or twice daily | 1/139 | 24 |
| Hirose (2015) <sup>(88,89)</sup>      | Insulin ± metformin      | Vildagliptin  | 0/78  | Placebo                                  | 0/78  | 12 |
| Hollander (2011) <sup>(90-92)</sup>   | Thiazolidinedione        | Saxagliptin   | 2/381 | Placebo                                  | 0/184 | 76 |
| Hollander (2013) <sup>(93)</sup>      | Metformin                | Taspoglutide  | 0/154 | Placebo                                  | 1/150 | 24 |
| Home (2015) <sup>(94)</sup>           | Metformin + glimepiride  | Albiglutide   | 0/271 | Placebo                                  | 1/115 | 52 |
|                                       |                          | Albiglutide   | 0/271 | Pioglitazone                             | 3/277 |    |
| Idorn (2015) <sup>(95)</sup>          | Metformin                | Liraglutide   | 0/25  | Placebo                                  | 0/22  | 12 |
| Inagaki (2012) <sup>(96,97)</sup>     | None                     | Exenatide     | 1/215 | Insulin glargine                         | 0/212 | 26 |
| Iwamoto (2010) <sup>(98)</sup>        | None                     | Vildagliptin  | 0/188 | Voglibose                                | 0/192 | 12 |
| Kadowaki (2009) <sup>(99)</sup>       | None                     | Exenatide     | 0/111 | Placebo                                  | 0/40  | 12 |
| Kadowaki (2011) <sup>(100,101)</sup>  | None                     | Exenatide     | 0/144 | Placebo                                  | 0/35  | 24 |
| Kadowaki (2013a) <sup>(102)</sup>     | Insulin                  | Sitagliptin   | 0/129 | Placebo                                  | 0/137 | 16 |
| Kadowaki (2013b) <sup>(103,104)</sup> | Pioglitazone             | Teneligliptin | 0/103 | Placebo                                  | 0/101 | 12 |
| Kadowaki (2013c) <sup>(105,106)</sup> | None                     | Teneligliptin | 0/244 | Placebo                                  | 1/80  | 12 |
| Kadowaki (2014) <sup>(107)</sup>      | Glimepiride              | Teneligliptin | 0/96  | Placebo                                  | 0/98  | 12 |

|                                                 |                                                                        |               |       |                                |       |    |
|-------------------------------------------------|------------------------------------------------------------------------|---------------|-------|--------------------------------|-------|----|
| Kaku (2010) <sup>(108)</sup>                    | SU                                                                     | Liraglutide   | 0/176 | Placebo                        | 0/84  | 24 |
| Kaku (2016) <sup>(109)</sup>                    | Glinide, metformin,<br>α-glucosidase inhibitor or<br>thiazolidinedione | Liraglutide   | 1/240 | An additional OAD              | 0/120 | 52 |
| Kawamori (2012) <sup>(110-112)</sup>            | None                                                                   | Linagliptin   | 0/319 | Placebo                        | 0/80  | 12 |
|                                                 |                                                                        | Linagliptin   | 0/319 | Voglibose                      | 0/162 |    |
| Kikuchi (2009) <sup>(113)</sup>                 | None                                                                   | Vildagliptin  | 0/219 | Placebo                        | 0/72  | 12 |
| Kikuchi (2010) <sup>(114)</sup>                 | Glimepiride                                                            | Vildagliptin  | 0/102 | Placebo                        | 0/100 | 12 |
| Kim (2015) <sup>(115)</sup>                     | Metformin                                                              | Teneligliptin | 0/136 | Placebo                        | 0/68  | 16 |
| Kim (2016) <sup>(116)</sup>                     | Metformin                                                              | Vildagliptin  | 0/117 | Pioglitazone                   | 0/111 | 16 |
| Kobayashi (2014) <sup>(117)</sup>               | Metformin or pioglitazone                                              | Sitagliptin   | 0/58  | Alpha-glucosidase<br>inhibitor | 0/58  | 24 |
| Kothny (2013) <sup>(118)</sup>                  | Insulin ±Metformin                                                     | Vildagliptin  | 0/227 | Placebo                        | 1/221 | 24 |
| Lavalle-Gonzalez (2013)<br><sup>(119,120)</sup> | Metformin                                                              | Sitagliptin   | 0/366 | Canagliflozin                  | 1/735 | 26 |
|                                                 |                                                                        | Sitagliptin   | 0/366 | Placebo                        | 0/183 |    |
| Liutkus (2010) <sup>(121)</sup>                 | Thiazolidinediones ±<br>metformin                                      | Exenatide     | 0/111 | Placebo                        | 0/54  | 26 |
| Lukashevich (2011) <sup>(122,123)</sup>         | Metformin                                                              | Vildagliptin  | 8/287 | Placebo                        | 6/226 | 52 |
| Lukashevich (2014) <sup>(124)</sup>             | None                                                                   | Vildagliptin  | 0/157 | Placebo                        | 1/160 | 24 |
| Macauley (2015) <sup>(125)</sup>                | Metformin                                                              | Vildagliptin  | 0/22  | Placebo                        | 0/22  | 26 |
| Marre (2009) <sup>(126)</sup>                   | Glimepiride                                                            | Liraglutide   | 0/695 | Placebo                        | 0/114 | 26 |
|                                                 |                                                                        | Liraglutide   | 0/695 | Rosiglitazone                  | 0/231 |    |
| Mathieu (2014) <sup>(127)</sup>                 | Insulin degludec (IDeg) +<br>Metformin                                 | Liraglutide   | 0/87  | Insulin aspart                 | 0/86  | 26 |
| Mathieu (2015) <sup>(128,129)</sup>             | None                                                                   | Sitagliptin   | 2/329 | Placebo                        | 1/329 | 24 |

|                                            |                          |              |       |                         |       |     |
|--------------------------------------------|--------------------------|--------------|-------|-------------------------|-------|-----|
| Matthaei (2015) <sup>(130,131)</sup>       | Dapagliflozin +metformin | Saxagliptin  | 0/153 | Placebo                 | 1/162 | 52  |
| Miyagawa (2015) <sup>(132)</sup>           | None                     | Dulaglutide  | 0/280 | Placebo                 | 0/70  | 26  |
|                                            |                          | Liraglutide  | 0/137 | Placebo                 | 0/70  |     |
| Moretto (2008) <sup>(133)</sup>            | None                     | Exenatide    | 0/155 | Placebo                 | 0/77  | 24  |
| Mori (2016) <sup>(134)</sup>               | None                     | Linagliptin  | 0/40  | Voglibose               | 1/38  | 12  |
| Moses (2016) <sup>(135)</sup>              | Sulfonylurea + metformin | Sitagliptin  | 0/210 | Placebo                 | 1/212 | 24  |
| Nauck (2007) <sup>(136,137)</sup>          | Sulfonylurea + metformin | Exenatide    | 2/253 | Biphasic insulin aspart | 1/248 | 52  |
| Nauck (2009) <sup>(138,139)</sup>          | Metformin                | Alogliptin   | 1/423 | Placebo                 | 0/104 | 26  |
|                                            |                          | Liraglutide  | 2/724 | Placebo                 | 0/121 | 104 |
|                                            |                          | Liraglutide  | 2/724 | Glimepiride             | 0/242 |     |
| Nauck (2013b) <sup>(142)</sup>             | Metformin                | Taspoglutide | 1/715 | Insulin glargine        | 2/322 | 24  |
| Nauck (2014) <sup>(143,144)</sup>          | Metformin                | Dulaglutide  | 1/606 | Placebo                 | 0/177 | 52  |
|                                            |                          | Sitagliptin  | 2/315 | Placebo                 | 0/177 |     |
| Nauck (2016) <sup>(145)</sup>              | None                     | Albiglutide  | 3/200 | Placebo                 | 0/101 | 52  |
| NCT00086515 (2010)<br><sup>(146,147)</sup> | None                     | Sitagliptin  | 2/464 | Glipizide               | 0/237 | 104 |
| NCT00095056 (2010) <sup>(148)</sup>        | None                     | Sitagliptin  | 1/65  | Placebo                 | 0/26  | 54  |
| NCT00106704 (2010)<br><sup>(149,150)</sup> | Glimepiride ± metformin  | Sitagliptin  | 2/222 | Placebo                 | 1/219 | 24  |
| NCT00289848 (2010)<br><sup>(151,152)</sup> | None                     | Sitagliptin  | 1/352 | Placebo                 | 0/178 | 18  |
| NCT00305604 (2009)<br><sup>(153,154)</sup> | None                     | Sitagliptin  | 0/102 | Placebo                 | 0/104 | 24  |
| NCT00337610 (2009)<br><sup>(155,156)</sup> | Metformin                | Sitagliptin  | 0/96  | Placebo                 | 1/94  | 30  |
| NCT00511108 (2010)                         | None                     | Sitagliptin  | 0/52  | Placebo                 | 0/53  | 12  |

|                                     |                           |              |       |                     |       |     |
|-------------------------------------|---------------------------|--------------|-------|---------------------|-------|-----|
| (157,158)                           | Pioglitazone              | Sitagliptin  | 0/52  | No additional drugs | 0/54  |     |
| NCT00655863 (2013)<br>(159,160)     | None                      | Alogliptin   | 0/25  | Placebo             | 0/24  | 16  |
| NCT00707993 (2013)<br>(161,162)     | None                      | Alogliptin   | 0/222 | Glipizide           | 0/219 | 52  |
| NCT00713830 (2016) <sup>(163)</sup> | None                      | Lixisenatide | 1/574 | Placebo             | 0/285 | 24  |
| NCT00715624 (2016) <sup>(164)</sup> | None                      | Lixisenatide | 1/328 | Placebo             | 0/167 | 24  |
| NCT00800683 (2011) <sup>(165)</sup> | Insulin                   | Linagliptin  | 1/68  | Placebo             | 1/65  | 18  |
| NCT00819091 (2011)<br>(166,167)     | SU                        | Linagliptin  | 1/161 | Placebo             | 0/84  | 18  |
| NCT00839527 (2014) <sup>(168)</sup> | Metformin + glimepiride   | Albiglutide  | 1/271 | Placebo             | 0/115 | 164 |
|                                     |                           | Albiglutide  | 1/271 | Pioglitazone        | 0/227 |     |
| NCT00881530 (2014)<br>(169,170)     | Metformin                 | Sitagliptin  | 0/56  | No additional drugs | 1/56  | 78  |
|                                     |                           | Sitagliptin  | 0/56  | Empagliflozin       | 0/332 |     |
| NCT01075282 (2014) <sup>(171)</sup> | Metformin + glimepiride   | Dulaglutide  | 0/545 | Insulin Glargine    | 1/262 | 78  |
| NCT01318083 (2011)<br>(172,173)     | Glimepiride               | Alogliptin   | 2/209 | Placebo             | 0/103 | 12  |
| NCT01644500 (2015) <sup>(174)</sup> | None                      | Dulaglutide  | 1/536 | Glimepiride         | 0/269 | 26  |
| NCT01648582 (2015) <sup>(175)</sup> | Metformin ± sulfonyleurea | Dulaglutide  | 1/526 | Insulin Glargine    | 0/257 | 52  |
| NCT01682759 (2016) <sup>(176)</sup> | None                      | Omarigliptin | 2/375 | Glimepiride         | 1/375 | 54  |
| NCT01717313 (2016) <sup>(177)</sup> | Metformin                 | Omarigliptin | 0/165 | Placebo             | 1/164 | 24  |
| NCT01778049 (2016) <sup>(178)</sup> | Empagliflozin + Metformin | Linagliptin  | 0/238 | Placebo             | 0/240 | 24  |
| NCT01890122 (2016) <sup>(179)</sup> | None                      | Alogliptin   | 0/162 | Placebo             | 1/161 | 26  |
|                                     | Metformin                 | Alogliptin   | 0/158 | No additional drugs | 0/161 |     |
| Ning (2016) <sup>(180)</sup>        | Insulin ± metformin       | Vildagliptin | 0/146 | Placebo             | 0/147 | 24  |
| Nowicki (2011) <sup>(181-183)</sup> | None                      | Saxagliptin  | 3/85  | Placebo             | 4/85  | 52  |
| Odawara (2014) <sup>(184)</sup>     | Metformin                 | Vildagliptin | 0/69  | Placebo             | 0/70  | 12  |

|                                              |                             |              |       |                     |       |     |
|----------------------------------------------|-----------------------------|--------------|-------|---------------------|-------|-----|
| Oe (2015) <sup>(185)</sup>                   | None                        | Sitagliptin  | 0/40  | Voglibose           | 0/40  | 24  |
| Oyama (2016) <sup>(186)</sup>                | Conventional therapy        | Sitagliptin  | 3/222 | No additional drugs | 2/220 | 108 |
| Pan (2008) <sup>(187)</sup>                  | None                        | Vildagliptin | 0/431 | Acarbose            | 0/216 | 24  |
| Pan (2012) <sup>(188,189)</sup>              | None                        | Saxagliptin  | 1/284 | Placebo             | 0/284 | 24  |
| Pan (2016) <sup>(190)</sup>                  | Metformin or pioglitazone   | Alogliptin   | 0/252 | Placebo             | 0/253 | 16  |
| Perez-Monteverde (2011) <sup>(191,192)</sup> | None                        | Sitagliptin  | 0/244 | Pioglitazone        | 0/248 | 12  |
| Pfutzner (2011) <sup>(193-195)</sup>         | None                        | Saxagliptin  | 2/335 | Metformin           | 5/328 | 76  |
|                                              | Metformin                   | Saxagliptin  | 3/643 | No additional drugs | 5/328 |     |
| Pinget (2013) <sup>(196)</sup>               | Pioglitazone ± metformin.   | Lixisenatide | 0/323 | Placebo             | 2/161 | 24  |
| Pratley (2006) <sup>(197)</sup>              | None                        | Vildagliptin | 0/70  | Placebo             | 0/28  | 12  |
| Pratley (2009a) <sup>(198,199)</sup>         | Pioglitazone                | Alogliptin   | 1/397 | Placebo             | 0/97  | 26  |
| Pratley (2009b) <sup>(200,201)</sup>         | Glyburide                   | Alogliptin   | 0/401 | Placebo             | 0/99  | 26  |
| Pratley (2013) <sup>(202)</sup>              | Metformin + SU              | Taspoglutide | 0/494 | Pioglitazone        | 0/257 | 24  |
| Pratley (2014) <sup>(203,204)</sup>          | None                        | Alogliptin   | 0/222 | Placebo             | 0/106 | 26  |
|                                              | Metformin                   | Alogliptin   | 0/220 | No additional drugs | 0/220 |     |
| Probstfield (2016) <sup>(205)</sup>          | Metformin + insulin analogs | Exenatide    | 1/47  | No additional drugs | 0/45  | 26  |
| Raz (2012) <sup>(206)</sup>                  | None                        | Taspoglutide | 0/239 | Placebo             | 0/129 | 24  |
| Reasner (2011) <sup>(207-209)</sup>          | Metformin                   | Sitagliptin  | 1/625 | No additional drugs | 2/621 | 44  |
| Riddle (2013) <sup>(210)</sup>               | Basal insulin ± metformin   | Lixisenatide | 1/328 | Placebo             | 0/167 | 24  |
| Roden (2015) <sup>(211-213)</sup>            | None                        | Sitagliptin  | 1/223 | Placebo             | 1/229 | 24  |
|                                              |                             | Sitagliptin  | 1/223 | Empagliflozin       | 0/447 |     |
| Rosenstock (2008) <sup>(214,215)</sup>       | None                        | Saxagliptin  | 0/271 | Placebo             | 0/67  | 12  |
| Rosenstock (2009) <sup>(216,217)</sup>       | Insulin ± metformin         | Alogliptin   | 1/260 | Placebo             | 0/129 | 26  |

|                                         |                              |              |       |                     |       |     |
|-----------------------------------------|------------------------------|--------------|-------|---------------------|-------|-----|
| Rosenstock (2013a) <sup>(218-220)</sup> | None                         | Saxagliptin  | 0/306 | Placebo             | 1/95  | 206 |
| Rosenstock (2013b) <sup>(221,222)</sup> | Metformin                    | Sitagliptin  | 0/71  | Placebo             | 0/71  | 12  |
|                                         |                              | Sitagliptin  | 0/71  | Empagliflozin       | 0/353 |     |
| Rosenstock (2014) <sup>(223)</sup>      | None                         | Lixisenatide | 1/574 | Placebo             | 0/285 | 24  |
| Rosenstock (2015) <sup>(224)</sup>      | Metformin                    | Saxagliptin  | 0/176 | Dapagliflozin       | 0/179 | 24  |
|                                         |                              | Saxagliptin  | 0/179 | Placebo             | 0/179 |     |
| Rosenstock (2016a) <sup>(225)</sup>     | Metformin + insulin glargine | Lixisenatide | 0/161 | No additional drugs | 0/162 | 24  |
| Rosenstock (2016b) <sup>(226,227)</sup> | None                         | Lixisenatide | 1/233 | Insulin Glargine    | 3/467 | 30  |
| Ross (2012) <sup>(228,229)</sup>        | Metformin                    | Linagliptin  | 0/447 | Placebo             | 0/44  | 12  |
| Russell-Jones (2012) <sup>(230)</sup>   | None                         | Exenatide    | 0/248 | Metformin           | 1/246 | 26  |
|                                         |                              | Sitagliptin  | 0/163 | Pioglitazone        | 0/163 |     |
| Scherbaum (2008) <sup>(231,232)</sup>   | None                         | Vildagliptin | 0/156 | Placebo             | 1/150 | 52  |
| Scherthner (2013) <sup>(233,234)</sup>  | Metformin + SU               | Sitagliptin  | 0/378 | Canagliflozin       | 2/377 | 52  |
| Scherthner (2015) <sup>(235,236)</sup>  | None                         | Saxagliptin  | 1/359 | Glimepiride         | 1/359 | 52  |
| Schweizer (2007) <sup>(237)</sup>       | None                         | Vildagliptin | 2/511 | Metformin           | 2/249 | 52  |
| Schweizer (2009) <sup>(238)</sup>       | None                         | Vildagliptin | 1/167 | Metformin           | 0/165 | 24  |
| Seck (2010) <sup>(239-241)</sup>        | Metformin                    | Sitagliptin  | 1/588 | Glipizide           | 8/584 | 104 |
| Seino (2010) <sup>(242-244)</sup>       | None                         | Liraglutide  | 1/268 | Glibenclamide       | 0/132 | 24  |
| Seino (2011) <sup>(245,246)</sup>       | Voglibose                    | Alogliptin   | 0/155 | Placebo             | 0/75  | 12  |
| Seino (2012a) <sup>(247,248)</sup>      | Metformin                    | Alogliptin   | 0/188 | Placebo             | 0/100 | 12  |
| Seino (2012b) <sup>(249)</sup>          | Insulin regimen ± SU         | Lixisenatide | 0/154 | Placebo             | 1/157 | 24  |
| Seino (2014) <sup>(250,251)</sup>       | None                         | Albiglutide  | 0/159 | Placebo             | 0/53  | 24  |
| Seino (2016) <sup>(252)</sup>           | Insulin                      | Liraglutide  | 0/127 | Placebo             | 0/130 | 36  |
| Sheu (2015) <sup>(253)</sup>            | None                         | Omarigliptin | 4/405 | Placebo             | 1/80  | 78  |

|                                             |                                                                                        |              |          |                             |          |      |
|---------------------------------------------|----------------------------------------------------------------------------------------|--------------|----------|-----------------------------|----------|------|
| Strain (2013) <sup>(254)</sup>              | None                                                                                   | Vildagliptin | 1/139    | Placebo                     | 1/139    | 24   |
| Tajima (2011) <sup>(255)</sup>              | Glimepiride                                                                            | Sitagliptin  | 0/71     | Placebo                     | 0/67     | 12   |
| Terauchi (2014) <sup>(256)</sup>            | None                                                                                   | Dulaglutide  | 1/108    | Placebo                     | 0/37     | 16   |
| Thrasher (2014) <sup>(257,258)</sup>        | None                                                                                   | Linagliptin  | 0/106    | Placebo                     | 0/120    | 24   |
| Umpierrez (2011) <sup>(259)</sup>           | None                                                                                   | Dulaglutide  | 0/196    | Placebo                     | 0/66     | 16   |
| Umpierrez (2014) <sup>(260)</sup>           | None                                                                                   | Dulaglutide  | 0/539    | Metformin                   | 0/268    | 52   |
| Vilsboll (2010) <sup>(261)</sup>            | Insulin + metformin                                                                    | Sitagliptin  | 0/322    | Placebo                     | 0/319    | 24   |
| Wang (2016) <sup>(262)</sup>                | Metformin                                                                              | Linagliptin  | 0/205    | Placebo                     | 0/100    | 24   |
| Weissman (2014) <sup>(263,264)</sup>        | Metformin ± SU                                                                         | Albiglutide  | 3/504    | Insulin glargine            | 3/241    | 164  |
| White (2014) <sup>(265,266)</sup>           | Metformin                                                                              | Saxagliptin  | 0/74     | Placebo                     | 0/86     | 12   |
| Williams-Herman (2010) <sup>(267-270)</sup> | None                                                                                   | Sitagliptin  | 0/179    | Metformin                   | 2/176    | 104  |
|                                             | Metformin                                                                              | Sitagliptin  | 3/372    | No additional drugs         | 0/364    |      |
| Wysham (2014) <sup>(271,272)</sup>          | Metformin + pioglitazone                                                               | Dulaglutide  | 2/559    | Placebo                     | 0/141    | 26   |
|                                             |                                                                                        | Exenatide    | 0/276    | Placebo                     | 0/141    |      |
| Yang (2012) <sup>(273)</sup>                | Metformin                                                                              | Sitagliptin  | 0/197    | Placebo                     | 0/198    | 24   |
| Yang (2015) <sup>(274)</sup>                | Glimepiride                                                                            | Vildagliptin | 0/143    | Placebo                     | 0/136    | 24   |
| Yki-Jarvinen (2013) <sup>(275,276)</sup>    | Basal insulin                                                                          | Linagliptin  | 5/631    | Placebo                     | 5/630    | 52   |
| Yokoh (2015) <sup>(277)</sup>               | Metformin ± pioglitazone                                                               | Sitagliptin  | 0/58     | Alpha-glucosidase inhibitor | 0/58     | 24   |
| Yu Pan (2014) <sup>(278)</sup>              | Metformin ± SU                                                                         | Lixisenatide | 0/196    | Placebo                     | 0/194    | 24   |
| Zinman (2009) <sup>(279)</sup>              | Metformin + rosiglitazone                                                              | Liraglutide  | 0/356    | Placebo                     | 0/177    | 26   |
| <b>Large cardiovascular outcomes trials</b> |                                                                                        |              |          |                             |          |      |
| Green (2015) (TECOS) <sup>(280)</sup>       | OADs (Metformin, pioglitazone, or sulfonylurea) or insulin (with or without metformin) | Sitagliptin  | 547/7332 | Placebo                     | 537/7339 | 156* |
| Marso (2016) (LEADER)                       | Standard of care treatment                                                             | Liraglutide  | 381/4668 | Placebo                     | 447/4672 | 197* |



|                                         |                                                                                                                                                                                                              |              |          |         |          |      |
|-----------------------------------------|--------------------------------------------------------------------------------------------------------------------------------------------------------------------------------------------------------------|--------------|----------|---------|----------|------|
| (281)                                   | (none, or treated with one or more OAD, or human NPH insulin, or long-acting insulin analogue (alone or in combination with OAD(s)))                                                                         |              |          |         |          |      |
| Marso (2016)<br>(SUSTAIN-6) (282)       | Standard of care treatment (none; or treated with one or two OAD; or basal insulin (human NPH insulin, or long-acting insulin analogue) or premixed insulin, alone or in combination with one or two OAD(s)) | Semaglutide  | 62/1648  | Placebo | 60/1649  | 104* |
| Pfeffer (2015) (ELIXA) (283)            | Metformin, SU, TZD, insulin, or other diabetes medications                                                                                                                                                   | Lixisenatide | 211/3034 | Placebo | 223/3034 | 108* |
| Scirica (2013)<br>(SAVOR-TIMI 53) (284) | Antihyperglycemic drugs (metformin, SU, TZD, insulin, other antihyperglycemic medications, or none)                                                                                                          | Saxagliptin  | 420/8280 | Placebo | 378/8212 | 109* |
| White (2013) (EXAMINE) (285)            | Standard of care treatment for type 2 diabetes mellitus (e.g. metformin, SU, insulin, TZD)                                                                                                                   | Alogliptin   | 153/2701 | Placebo | 173/2679 | 78*  |

SU=sulphonylurea; TZD thiazolidinedione; OADs oral antidiabetic drugs; NPH=Neutral Protamine Hagedorn.

\*median treatment time (weeks).

**Table D. Risk of bias of randomised controlled trials of incretin treatment in type 2 diabetes mellitus**

| Author (year)                             | Adequate randomisation sequence generation                                                                    | Adequate allocation concealment                                     | Blinding of participants and caregivers                           | Blinding of outcome assessors and outcome adjudicators | Free of infrequent missing outcome data#                                                                                                                                                                                                                                      | Free of selective outcome reporting | Free of other sources of bias                                                    |
|-------------------------------------------|---------------------------------------------------------------------------------------------------------------|---------------------------------------------------------------------|-------------------------------------------------------------------|--------------------------------------------------------|-------------------------------------------------------------------------------------------------------------------------------------------------------------------------------------------------------------------------------------------------------------------------------|-------------------------------------|----------------------------------------------------------------------------------|
| <b>Smaller trials</b>                     |                                                                                                               |                                                                     |                                                                   |                                                        |                                                                                                                                                                                                                                                                               |                                     |                                                                                  |
| Ahren (2013) <sup>(1)</sup>               | <b>Probably yes</b><br>Randomised, double-blind*                                                              | <b>Probably yes</b><br>Randomised, double-blind†                    | <b>Definitely yes</b><br>Double-blind (participant, investigator) | <b>Definitely yes‡</b>                                 | <b>Probably yes</b><br>There were 10.4% (53/510) and 7.1% (12/158) patients in incretin and control groups with missing outcome data, respectively; missing outcome data were generally balanced across treatment groups, with similar reasons for missing data across groups | <b>Definitely yes§</b>              | <b>Probably yes</b><br>Generally balanced baseline characteristics across groups |
| Ahren (2014) <sup>(2,3)</sup>             | <b>Probably yes</b><br>Randomised, double-blind                                                               | <b>Probably yes</b><br>Randomised, double-blind                     | <b>Definitely yes</b><br>Double-blind (participant, investigator) | <b>Definitely yes</b>                                  | <b>Definitely no</b><br>There were 32.0% (201/628) and 33.5% (141/421) patients in incretin and control groups with missing outcome data, respectively                                                                                                                        | <b>Definitely yes</b>               | <b>Probably yes</b><br>Generally balanced baseline characteristics across groups |
| Amin (2015) <sup>(4)</sup>                | <b>Definitely yes</b><br>Using a computer-generated random permuted block method                              | <b>Probably yes</b><br>Randomised, double-blind                     | <b>Definitely yes</b><br>Double-blind (participant, investigator) | <b>Definitely yes</b>                                  | <b>Definitely no</b><br>There were 5.5% (3/55) and 14.3% (39/273) patients in incretin and control groups with missing outcome data, respectively; missing outcome data were not balanced across treatment groups                                                             | <b>Definitely yes</b>               | <b>Probably yes</b><br>Generally balanced baseline characteristics across groups |
| Araki (2015) <sup>(5)</sup>               | <b>Definitely yes</b><br>Using a computer-generated random sequence with an interactive voice response system | <b>Definitely yes</b><br>Using an interactive voice response system | <b>Definitely no</b><br>Open-label                                | <b>Definitely yes</b>                                  | <b>Definitely yes</b><br>There were 4.4% (8/181) and 1.7% (3/180) patients in incretin and control groups with missing outcome data, respectively; missing outcome data were generally balanced across treatment groups, with similar reasons for missing data across groups  | <b>Definitely yes</b>               | <b>Probably yes</b><br>Generally balanced baseline characteristics across groups |
| Arechavaleta (2011) <sup>(6,7)</sup>      | <b>Definitely yes</b><br>Using a concealed computer-generated allocation schedule                             | <b>Probably yes</b><br>Randomised, double-blind                     | <b>Definitely yes</b><br>Double-blind (participant, investigator) | <b>Definitely yes</b>                                  | <b>Probably yes</b><br>There were 9.3% (48/516) and 9.2% (51/519) patients in incretin and control groups with missing outcome data, respectively; missing outcome data were generally balanced across treatment groups, with similar reasons for missing data across groups  | <b>Definitely yes</b>               | <b>Probably yes</b><br>Generally balanced baseline characteristics across groups |
| Arjona Ferreira (2013a) <sup>(8)</sup>    | <b>Definitely yes</b><br>Using a computer-generated randomisation schedule                                    | <b>Probably yes</b><br>Randomised, double-blind                     | <b>Definitely yes</b><br>Double-blind (participant, investigator) | <b>Definitely yes</b>                                  | <b>Definitely no</b><br>There were 26.6% (17/64) and 30.8% (20/65) patients in incretin and control groups with missing outcome data, respectively                                                                                                                            | <b>Definitely yes</b>               | <b>Probably yes</b><br>Generally balanced baseline characteristics across groups |
| Arjona Ferreira (2013b) <sup>(9,10)</sup> | <b>Definitely yes</b><br>Using a computer-generated randomisation schedule                                    | <b>Probably yes</b><br>Randomised, double-blind                     | <b>Definitely yes</b><br>Double-blind (participant, investigator) | <b>Definitely yes</b>                                  | <b>Definitely no</b><br>There were 22.3% (47/211) and 19.8% (42/212) patients in incretin and control groups with missing outcome data, respectively                                                                                                                          | <b>Definitely yes</b>               | <b>Probably yes</b><br>Generally balanced baseline characteristics across groups |

|                                    |                                                                                                                      |                                                                                |                                                                   |                       |                                                                                                                                                                                                                                                                              |                       |                                                                                  |
|------------------------------------|----------------------------------------------------------------------------------------------------------------------|--------------------------------------------------------------------------------|-------------------------------------------------------------------|-----------------------|------------------------------------------------------------------------------------------------------------------------------------------------------------------------------------------------------------------------------------------------------------------------------|-----------------------|----------------------------------------------------------------------------------|
| Aroda (2016) <sup>(11)</sup>       | <b>Definitely yes</b><br>Using an interactive voice/web response system                                              | <b>Definitely yes</b><br>Using an interactive voice/web response system        | <b>Definitely no</b><br>Open-label                                | <b>Definitely yes</b> | <b>Probably yes</b><br>There were 8.4% (31/367) and 3.8% (14/369) patients in incretin and control groups with missing outcome data, respectively; missing outcome data were generally balanced across treatment groups, with similar reasons for missing data across groups | <b>Definitely yes</b> | <b>Probably yes</b><br>Generally balanced baseline characteristics across groups |
| Aschner (2010) <sup>(12,13)</sup>  | <b>Definitely yes</b><br>Using a computer-generated allocation schedule                                              | <b>Probably yes</b><br>Randomised, double-blind                                | <b>Definitely yes</b><br>Double-blind (participant, investigator) | <b>Definitely yes</b> | <b>Probably no</b><br>There were 11.6% (61/528) and 14.4% (75/522) patients in incretin and control groups with missing outcome data, respectively                                                                                                                           | <b>Definitely yes</b> | <b>Probably yes</b><br>Generally balanced baseline characteristics across groups |
| Ba (2016) <sup>(14)</sup>          | <b>Definitely yes</b><br>Using a computer-generated allocation schedule                                              | <b>Definitely yes</b><br>Using an interactive voice response system            | <b>Definitely yes</b><br>Double-blind (participant, investigator) | <b>Definitely yes</b> | <b>Definitely no</b><br>There were 7.6% (19/249) and 15.7% (39/249) patients in incretin and control groups with missing outcome data, respectively; missing outcome data were not balanced across treatment groups                                                          | <b>Definitely yes</b> | <b>Probably yes</b><br>Generally balanced baseline characteristics across groups |
| Bajaj (2014) <sup>(15)</sup>       | <b>Definitely yes</b><br>Using a computer-generated random sequence                                                  | <b>Definitely yes</b><br>Using an interactive voice response system            | <b>Probably yes</b><br>Double-blind (details not reported)        | <b>Definitely yes</b> | <b>Probably no</b><br>There were 9.8% (18/183) and 14.6% (13/89) patients in incretin and control groups with missing outcome data, respectively                                                                                                                             | <b>Definitely yes</b> | <b>Probably yes</b><br>Generally balanced baseline characteristics across groups |
| Barnett (2012) <sup>(16)</sup>     | <b>Definitely yes</b><br>Using an interactive voice response system using a centrally blocked randomisation schedule | <b>Definitely yes</b><br>Using an interactive voice response system            | <b>Definitely yes</b><br>Double-blind (participant, investigator) | <b>Definitely yes</b> | <b>Probably no</b><br>There were 11.8% (36/304) and 11.3% (17/151) patients in incretin and control groups with missing outcome data, respectively                                                                                                                           | <b>Definitely yes</b> | <b>Probably yes</b><br>Generally balanced baseline characteristics across groups |
| Barnett (2013a) <sup>(17,18)</sup> | <b>Definitely yes</b><br>Using computer-generated randomisation sequence                                             | <b>Definitely yes</b><br>Using a central interactive voice-web response system | <b>Definitely yes</b><br>Double-blind (participant, investigator) | <b>Definitely yes</b> | <b>Probably yes</b><br>There were 9.9% (16/162) and 6.3% (5/79) patients in incretin and control groups with missing outcome data, respectively; missing outcome data were generally balanced across treatment groups, with similar reasons for missing data across groups   | <b>Definitely yes</b> | <b>Probably yes</b><br>Generally balanced baseline characteristics across groups |
| Barnett (2013b) <sup>(19-21)</sup> | <b>Definitely yes</b><br>Using computer-generated blocked randomisation schedule                                     | <b>Definitely yes</b><br>Using an interactive voice response system            | <b>Definitely yes</b><br>Double-blind (participant, investigator) | <b>Definitely yes</b> | <b>Definitely no</b><br>There were 19.1% (58/304) and 17.2% (26/151) patients in incretin and control groups with missing outcome data, respectively                                                                                                                         | <b>Definitely yes</b> | <b>Probably yes</b><br>Generally balanced baseline characteristics across groups |

|                                   |                                                                                                                                |                                                                                                                                |                                                                   |                       |                                                                                                                                                                                                        |                       |                                                                                  |
|-----------------------------------|--------------------------------------------------------------------------------------------------------------------------------|--------------------------------------------------------------------------------------------------------------------------------|-------------------------------------------------------------------|-----------------------|--------------------------------------------------------------------------------------------------------------------------------------------------------------------------------------------------------|-----------------------|----------------------------------------------------------------------------------|
| Bergenstal (2009) <sup>(22)</sup> | <b>Definitely yes</b><br>Using a telephone interactive voice response system and/or interactive web-based randomisation system | <b>Definitely yes</b><br>Using a telephone interactive voice response system and/or interactive web-based randomisation system | <b>Definitely no</b><br>Open-label                                | <b>Definitely yes</b> | <b>Definitely no</b><br>More subjects had missing outcome data in the exenatide group (30%) than in the biphasic insulin aspart 70/30 QD group (16%) and biphasic insulin aspart 70/30 BID group (19%) | <b>Definitely yes</b> | <b>Probably yes</b><br>Generally balanced baseline characteristics across groups |
| Bergenstal (2012) <sup>(23)</sup> | <b>Definitely yes</b><br>Using either a telephone- or web-based system                                                         | <b>Definitely yes</b><br>Using a telephone- or web-based system                                                                | <b>Definitely yes</b><br>Double-blind (participant, investigator) | <b>Definitely yes</b> | <b>Definitely no</b><br>There were 19.9% (114/573) and 10.8% (10/93) patients in incretin and control groups with missing outcome data, respectively                                                   | <b>Definitely yes</b> | <b>Probably yes</b><br>Generally balanced baseline characteristics across groups |
| Blonde (2015) <sup>(24)</sup>     | <b>Definitely yes</b><br>Using a computer-generated randomisation sequence                                                     | <b>Definitely yes</b><br>Using an interactive voice-response system                                                            | <b>Definitely no</b><br>Open-label                                | <b>Definitely yes</b> | <b>Definitely no</b><br>There were 21.7% (70/322) and 21.6% (35/162) patients in incretin and control groups with missing outcome data, respectively                                                   | <b>Definitely yes</b> | <b>Probably yes</b><br>Generally balanced baseline characteristics across groups |
| Bolli (2014) <sup>(25)</sup>      | <b>Probably yes</b><br>Randomised, double-blind                                                                                | <b>Probably yes</b><br>Randomised, double-blind                                                                                | <b>Definitely yes</b><br>Double-blind (participant, investigator) | <b>Definitely yes</b> | <b>Definitely no</b><br>There were 24.1% (142/588) and 20.3% (60/296) patients in incretin and control groups with missing outcome data, respectively                                                  | <b>Definitely yes</b> | <b>Probably yes</b><br>Generally balanced baseline characteristics across groups |
| Bosi (2007) <sup>(26)</sup>       | <b>Probably yes</b><br>Randomised, double-blind                                                                                | <b>Probably yes</b><br>Randomised, double-blind                                                                                | <b>Probably yes</b><br>Double-blind (details not reported)        | <b>Definitely yes</b> | <b>Definitely no</b><br>There were 14.4% (52/362) and 16.5% (30/182) patients in incretin and control groups with missing outcome data, respectively                                                   | <b>Definitely yes</b> | <b>Probably yes</b><br>Generally balanced baseline characteristics across groups |
| Bosi (2009) <sup>(27)</sup>       | <b>Probably yes</b><br>Randomised, double-blind                                                                                | <b>Probably yes</b><br>Randomised, double-blind                                                                                | <b>Probably yes</b><br>Double-blind (details not reported)        | <b>Definitely yes</b> | <b>Definitely no</b><br>There were 15.3% (135/885) and 16.7% (49/294) patients in incretin and control groups with missing outcome data, respectively                                                  | <b>Definitely yes</b> | <b>Probably yes</b><br>Generally balanced baseline characteristics across groups |
| Buse (2011) <sup>(28,29)</sup>    | <b>Definitely yes</b><br>Using a centralized, computer-generated, random-sequence                                              | <b>Definitely yes</b><br>Using an interactive voice-response system                                                            | <b>Definitely yes</b><br>Double-blind (participant, investigator) | <b>Definitely yes</b> | <b>Definitely no</b><br>There were 19.0% (26/137) and 18.0% (22/122) patients in incretin and control groups with missing outcome data, respectively                                                   | <b>Definitely yes</b> | <b>Probably yes</b><br>Generally balanced baseline characteristics across groups |
| Chacra (2011) <sup>(30-32)</sup>  | <b>Definitely yes</b><br>Using an interactive voice response system                                                            | <b>Definitely yes</b><br>Using an interactive voice response system                                                            | <b>Definitely yes</b><br>Double-blind (participant, investigator) | <b>Definitely yes</b> | <b>Definitely no</b><br>There were 25.7% (129/501) and 30.7% (82/267) patients in incretin and control groups with missing outcome data, respectively                                                  | <b>Definitely yes</b> | <b>Probably yes</b><br>Generally balanced baseline characteristics across groups |
| Davies (2012) <sup>(33)</sup>     | <b>Definitely yes</b><br>Using an interactive voice response system                                                            | <b>Definitely yes</b><br>Using an interactive voice response system                                                            | <b>Definitely no</b><br>Open-label                                | <b>Definitely yes</b> | <b>Probably no</b><br>There were 17.1% (19/111) and 11.7% (12/111) patients in incretin and control groups with missing outcome data, respectively                                                     | <b>Definitely yes</b> | <b>Probably yes</b><br>Generally balanced baseline characteristics across groups |

|                                     |                                                                                                  |                                                                                               |                                                                   |                       |                                                                                                                                                         |                       |                                                                                  |
|-------------------------------------|--------------------------------------------------------------------------------------------------|-----------------------------------------------------------------------------------------------|-------------------------------------------------------------------|-----------------------|---------------------------------------------------------------------------------------------------------------------------------------------------------|-----------------------|----------------------------------------------------------------------------------|
| Davies (2015) <sup>(34,35)</sup>    | <b>Definitely yes</b><br>Using a centralized manner via an interactive voice/web response system | <b>Definitely yes</b><br>Using an interactive voice/web response system                       | <b>Definitely yes</b><br>Double-blind (participant, investigator) | <b>Definitely yes</b> | <b>Definitely no</b><br>There were 26.8% (170/634) and 34.0% (72/212) patients in incretin and control groups with missing outcome data, respectively   | <b>Definitely yes</b> | <b>Probably yes</b><br>Generally balanced baseline characteristics across groups |
| Davies (2016) <sup>(36)</sup>       | <b>Definitely yes</b><br>Using a sponsor-provided telephone or web-based randomisation system    | <b>Definitely yes</b><br>Using a sponsor-provided telephone or web-based randomisation system | <b>Definitely yes</b><br>Double-blind (participant, investigator) | <b>Definitely yes</b> | <b>Definitely no</b><br>There were 26.8% (25/140) and 24.5% (34/139) patients in incretin and control groups with missing outcome data, respectively    | <b>Definitely yes</b> | <b>Probably yes</b><br>Generally balanced baseline characteristics across groups |
| DeFronzo (2008) <sup>(37,38)</sup>  | <b>Probably yes</b><br>Randomised, double-blind                                                  | <b>Probably yes</b><br>Randomised, double-blind                                               | <b>Definitely yes</b><br>Double-blind (participant, investigator) | <b>Definitely yes</b> | <b>Definitely no</b><br>There were 19.7% (52/264) and 38.5% (25/65) patients in incretin and control groups with missing outcome data, respectively     | <b>Definitely yes</b> | <b>Probably yes</b><br>Generally balanced baseline characteristics across groups |
| DeFronzo (2009) <sup>(39,40)</sup>  | <b>Definitely yes</b><br>Using an interactive voice response system                              | <b>Definitely yes</b><br>Using an interactive voice response system                           | <b>Definitely yes</b><br>Double-blind (participant, investigator) | <b>Definitely yes</b> | <b>Definitely no</b><br>There were 23.6% (133/564) and 37.4% (67/179) patients in incretin and control groups with missing outcome data, respectively   | <b>Definitely yes</b> | <b>Probably yes</b><br>Generally balanced baseline characteristics across groups |
| DeFronzo (2012) <sup>(41)</sup>     | <b>Probably yes</b><br>Randomised, double-blind                                                  | <b>Probably yes</b><br>Randomised, double-blind                                               | <b>Definitely yes</b><br>Double-blind (participant, investigator) | <b>Definitely yes</b> | <b>Definitely no</b><br>There were 15.3% (159/1037) and 31.5% (163/517) patients in incretin and control groups with missing outcome data, respectively | <b>Definitely yes</b> | <b>Probably yes</b><br>Generally balanced baseline characteristics across groups |
| DeFronzo (2015) <sup>(42,43)</sup>  | <b>Definitely yes</b><br>Using a third-party interactive voice and web response system           | <b>Definitely yes</b><br>Using a third-party interactive voice and web response system        | <b>Probably yes</b><br>Double-blind (details not reported)        | <b>Definitely yes</b> | <b>Probably no</b><br>There were 11.6% (47/405) and 13.5% (38/281) patients in incretin and control groups with missing outcome data, respectively      | <b>Definitely yes</b> | <b>Probably yes</b><br>Generally balanced baseline characteristics across groups |
| Del Prato (2014) <sup>(44,45)</sup> | <b>Probably yes</b><br>Randomised, double-blind                                                  | <b>Probably yes</b><br>Randomised, double-blind                                               | <b>Definitely yes</b><br>Double-blind (participant, investigator) | <b>Definitely yes</b> | <b>Definitely no</b><br>There were 20.8% (368/1765) and 25.3% (221/874) patients in incretin and control groups with missing outcome data, respectively | <b>Definitely yes</b> | <b>Probably yes</b><br>Generally balanced baseline characteristics across groups |
| Diamant (2014a) <sup>(46-49)</sup>  | <b>Definitely yes</b><br>Using a computer-generated random sequence                              | <b>Definitely yes</b><br>Using an interactive voice-response system                           | <b>Definitely no</b><br>Open-label                                | <b>Definitely yes</b> | <b>Definitely no</b><br>There were 36.9% (86/233) and 34.2% (80/234) patients in incretin and control groups with missing outcome data, respectively    | <b>Definitely yes</b> | <b>Probably yes</b><br>Generally balanced baseline characteristics across groups |
| Diamant (2014b) <sup>(50,51)</sup>  | <b>Definitely yes</b><br>Using block randomisation with computer-generated random sequence       | <b>Probably yes</b><br>Randomised, double-blind                                               | <b>Definitely no</b><br>Open-label                                | <b>Definitely yes</b> | <b>Probably no</b><br>There were 15.9% (50/315) and 11.9% (37/312) patients in incretin and control groups with missing outcome data, respectively      | <b>Definitely yes</b> | <b>Probably yes</b><br>Generally balanced baseline characteristics across groups |

|                                     |                                                                                    |                                                                             |                                                                   |                       |                                                                                                                                                                                                                                                                             |                       |                                                                                  |
|-------------------------------------|------------------------------------------------------------------------------------|-----------------------------------------------------------------------------|-------------------------------------------------------------------|-----------------------|-----------------------------------------------------------------------------------------------------------------------------------------------------------------------------------------------------------------------------------------------------------------------------|-----------------------|----------------------------------------------------------------------------------|
| Dobs (2013) <sup>(52)</sup>         | <b>Definitely yes</b><br>Using a computer-generated schedule                       | <b>Probably yes</b><br>Randomised, double-blind                             | <b>Definitely yes</b><br>Double-blind (participant, investigator) | <b>Definitely yes</b> | <b>Definitely no</b><br>There were 21.6% (21/97) and 12.7% (23/181) patients in incretin and control groups with missing outcome data, respectively; missing outcome data were not balanced across treatment groups                                                         | <b>Definitely yes</b> | <b>Probably yes</b><br>Generally balanced baseline characteristics across groups |
| Dungan (2016) <sup>(53,54)</sup>    | <b>Probably yes</b><br>Randomised, double-blind                                    | <b>Probably yes</b><br>Randomised, double-blind                             | <b>Definitely yes</b><br>Double-blind (participant, investigator) | <b>Definitely yes</b> | <b>Probably yes</b><br>There were 10.4% (25/240) and 6.7% (4/60) patients in incretin and control groups with missing outcome data, respectively; missing outcome data were generally balanced across treatment groups, with similar reasons for missing data across groups | <b>Definitely yes</b> | <b>Probably yes</b><br>Generally balanced baseline characteristics across groups |
| Ferdinand (2014) <sup>(55)</sup>    | <b>Definitely yes</b><br>Using a computer-generated random sequence                | <b>Probably yes</b><br>Randomised, double-blind                             | <b>Definitely yes</b><br>Double-blind (participant, investigator) | <b>Definitely yes</b> | <b>Definitely no</b><br>There were 16.0% (81/505) and 17.6% (44/250) patients in incretin and control groups with missing outcome data, respectively                                                                                                                        | <b>Definitely yes</b> | <b>Probably yes</b><br>Generally balanced baseline characteristics across groups |
| Ferrannini (2009) <sup>(56)</sup>   | <b>Probably yes</b><br>Randomised, double-blind                                    | <b>Probably yes</b><br>Randomised, double-blind                             | <b>Definitely yes</b><br>Double-blind (participant, investigator) | <b>Definitely yes</b> | <b>Definitely no</b><br>There were 15.9% (222/1396) and 19.7% (275/1393) patients in incretin and control groups with missing outcome data, respectively                                                                                                                    | <b>Definitely yes</b> | <b>Probably yes</b><br>Generally balanced baseline characteristics across groups |
| Filozof (2010) <sup>(57)</sup>      | <b>Probably yes</b><br>Randomised, double-blind                                    | <b>Probably yes</b><br>Randomised, double-blind                             | <b>Probably yes</b><br>Double-blind (details not reported)        | <b>Definitely yes</b> | <b>Definitely no</b><br>There were 20.5% (105/513) and 16.6% (82/494) patients in incretin and control groups with missing outcome data, respectively                                                                                                                       | <b>Definitely yes</b> | <b>Probably yes</b><br>Generally balanced baseline characteristics across groups |
| Fonseca (2007) <sup>(58)</sup>      | <b>Probably yes</b><br>Randomised, double-blind                                    | <b>Probably yes</b><br>Randomised, double-blind                             | <b>Probably yes</b><br>Double-blind (details not reported)        | <b>Definitely yes</b> | <b>Definitely no</b><br>There were 20.1% (29/144) and 17.8% (27/152) patients in incretin and control groups with missing outcome data, respectively                                                                                                                        | <b>Definitely yes</b> | <b>Probably yes</b><br>Generally balanced baseline characteristics across groups |
| Forst (2015) <sup>(59)</sup>        | <b>Probably yes</b><br>Randomised, double-blind                                    | <b>Probably yes</b><br>Randomised, double-blind                             | <b>Definitely no</b><br>Open-label                                | <b>Definitely yes</b> | <b>Definitely no</b><br>There were 27.7% (23/83) and 10.1% (8/79) patients in incretin and control groups with missing outcome data, respectively                                                                                                                           | <b>Definitely yes</b> | <b>Probably yes</b><br>Generally balanced baseline characteristics across groups |
| Frederich (2012) <sup>(60,61)</sup> | <b>Probably yes</b><br>Randomised, double-blind                                    | <b>Probably yes</b><br>Randomised, double-blind                             | <b>Definitely yes</b><br>Double-blind (participant, investigator) | <b>Definitely yes</b> | <b>Definitely no</b><br>There were 37.1% (108/291) and 35.1% (26/74) patients in incretin and control groups with missing outcome data, respectively                                                                                                                        | <b>Definitely yes</b> | <b>Probably yes</b><br>Generally balanced baseline characteristics across groups |
| Frías (2016) <sup>(62)</sup>        | <b>Definitely yes</b><br>Using a central interactive voice and web-response system | <b>Definitely yes</b><br>Using an interactive voice and web-response system | <b>Definitely yes</b><br>Double-blind (participant, investigator) | <b>Definitely yes</b> | <b>Probably no</b><br>There were 12.1% (56/462) and 9.9% (23/233) patients in incretin and control groups with missing outcome data, respectively                                                                                                                           | <b>Definitely yes</b> | <b>Probably yes</b><br>Generally balanced baseline characteristics across groups |

|                                     |                                                                                                                                                                    |                                                                                                       |                                                                   |                       |                                                                                                                                                        |                       |                                                                                  |
|-------------------------------------|--------------------------------------------------------------------------------------------------------------------------------------------------------------------|-------------------------------------------------------------------------------------------------------|-------------------------------------------------------------------|-----------------------|--------------------------------------------------------------------------------------------------------------------------------------------------------|-----------------------|----------------------------------------------------------------------------------|
| Gallwitz (2012a) <sup>(63,64)</sup> | <b>Definitely yes</b><br>Using a computer-generated random sequence                                                                                                | <b>Definitely yes</b><br>Using a central interactive voice or web response system                     | <b>Definitely yes</b><br>Double-blind (participant, investigator) | <b>Definitely yes</b> | <b>Definitely no</b><br>There were 24.4% (189/776) and 22.1% (171/775) patients in incretin and control groups with missing outcome data, respectively | <b>Definitely yes</b> | <b>Probably yes</b><br>Generally balanced baseline characteristics across groups |
| Gallwitz (2012b) <sup>(65,66)</sup> | <b>Definitely yes</b><br>Using a computer-generated randomisation sequence                                                                                         | <b>Probably no</b><br>Allocation concealment was not reported and this study is an open-label trial†† | <b>Definitely no</b><br>Open-label                                | <b>Definitely yes</b> | <b>Definitely no</b><br>There were 33.8% (174/515) and 24.9% (128/514) patients in incretin and control groups with missing outcome data, respectively | <b>Definitely yes</b> | <b>Probably yes</b><br>Generally balanced baseline characteristics across groups |
| Gao (2009) <sup>(67,68)</sup>       | <b>Definitely yes</b><br>Using a computerized random-number generator                                                                                              | <b>Probably yes</b><br>Randomised, double-blind                                                       | <b>Definitely yes</b><br>Double-blind (participant, investigator) | <b>Definitely yes</b> | <b>Probably no</b><br>There were 18.9% (45/238) and 11.1% (26/234) patients in incretin and control groups with missing outcome data, respectively     | <b>Definitely yes</b> | <b>Probably yes</b><br>Generally balanced baseline characteristics across groups |
| Garber (2008) <sup>(69)</sup>       | <b>Definitely yes</b><br>Using a health authority–inspected and validated system that automates the random assignment of treatment groups to randomisation numbers | <b>Probably yes</b><br>Randomised, double-blind                                                       | <b>Definitely yes</b><br>Double-blind (participant, investigator) | <b>Definitely yes</b> | <b>Definitely no</b><br>There were 33.9% (115/339) and 38.6% (68/176) patients in incretin and control groups with missing outcome data, respectively  | <b>Definitely yes</b> | <b>Probably yes</b><br>Generally balanced baseline characteristics across groups |
| Garber (2009) <sup>(70,71)</sup>    | <b>Definitely yes</b><br>Using a telephone-based or web-based systems                                                                                              | <b>Probably yes</b><br>Randomised, double-blind                                                       | <b>Definitely yes</b><br>Double-blind (participant, investigator) | <b>Definitely yes</b> | <b>Definitely no</b><br>There were 32.8% (163/498) and 38.7% (96/248) patients in incretin and control groups with missing outcome data, respectively  | <b>Definitely yes</b> | <b>Probably yes</b><br>Generally balanced baseline characteristics across groups |
| Giorgino (2015) <sup>(72)</sup>     | <b>Definitely yes</b><br>Using a computer-generated random sequence                                                                                                | <b>Definitely yes</b><br>Using an interactive voice response system                                   | <b>Definitely no</b><br>Open label                                | <b>Definitely yes</b> | <b>Probably no</b><br>There were 11.0% (60/545) and 10.3% (27/262) patients in incretin and control groups with missing outcome data, respectively     | <b>Definitely yes</b> | <b>Probably yes</b><br>Generally balanced baseline characteristics across groups |
| Goke (2013) <sup>(73-75)</sup>      | <b>Definitely yes</b><br>Using a balanced block randomisation schedule                                                                                             | <b>Definitely yes</b><br>Using an interactive Web-response system                                     | <b>Definitely yes</b><br>Double-blind (participant, investigator) | <b>Definitely yes</b> | <b>Definitely no</b><br>There were 61.4% (263/428) and 65.8% (283/430) patients in incretin and control groups with missing outcome data, respectively | <b>Definitely yes</b> | <b>Probably yes</b><br>Generally balanced baseline characteristics across groups |
| Goodman (2009) <sup>(76)</sup>      | <b>Probably yes</b><br>Randomised, double-blind                                                                                                                    | <b>Probably yes</b><br>Randomised, double-blind                                                       | <b>Probably yes</b><br>Double-blind (details not reported)        | <b>Definitely yes</b> | <b>Definitely no</b><br>There were 20.6% (51/248) and 26.2% (32/122) patients in incretin and control groups with missing outcome data, respectively   | <b>Definitely yes</b> | <b>Probably yes</b><br>Generally balanced baseline characteristics across groups |
| Gough (2014) <sup>(77)</sup>        | <b>Definitely yes</b><br>Using an interactive voice or web response system                                                                                         | <b>Definitely yes</b><br>Using an interactive voice or web response system                            | <b>Definitely no</b><br>Open label                                | <b>Definitely yes</b> | <b>Probably no</b><br>There were 11.8% (98/834) and 11.6% (48/414) patients in incretin and control groups with missing outcome data, respectively     | <b>Definitely yes</b> | <b>Probably yes</b><br>Generally balanced baseline characteristics across groups |

|                                     |                                                                            |                                                                            |                                                                   |                       |                                                                                                                                                                                                                                                                            |                       |                                                                                  |
|-------------------------------------|----------------------------------------------------------------------------|----------------------------------------------------------------------------|-------------------------------------------------------------------|-----------------------|----------------------------------------------------------------------------------------------------------------------------------------------------------------------------------------------------------------------------------------------------------------------------|-----------------------|----------------------------------------------------------------------------------|
| Grünberger (2012) <sup>(78)</sup>   | <b>Definitely yes</b><br>Using an interactive voice or web response system | <b>Definitely yes</b><br>Using an interactive voice or web response system | <b>Probably yes</b><br>Double-blind (details not reported)        | <b>Definitely yes</b> | <b>Probably yes</b><br>There were 8.9% (12/135) and 6.3% (2/32) patients in incretin and control groups with missing outcome data, respectively; missing outcome data were generally balanced across treatment groups, with similar reasons for missing data across groups | <b>Definitely yes</b> | <b>Probably yes</b><br>Generally balanced baseline characteristics across groups |
| Haak (2012) <sup>(79,80)</sup>      | <b>Probably yes</b><br>Randomised, double-blind                            | <b>Probably yes</b><br>Randomised, double-blind                            | <b>Probably yes</b><br>Double-blind (details not reported)        | <b>Definitely yes</b> | <b>Probably no</b><br>There were 11.2% (48/428) and 15.4% (56/363) patients in incretin and control groups with missing outcome data, respectively                                                                                                                         | <b>Definitely yes</b> | <b>Probably yes</b><br>Generally balanced baseline characteristics across groups |
| Hartley (2015) <sup>(81)</sup>      | <b>Definitely yes</b><br>Using a computer-generated allocation schedule    | <b>Definitely yes</b><br>Using an interactive voice response system        | <b>Definitely yes</b><br>Double-blind (participant, investigator) | <b>Definitely yes</b> | <b>Definitely no</b><br>There were 15.4% (37/241) and 16.3% (39/239) patients in incretin and control groups with missing outcome data, respectively                                                                                                                       | <b>Definitely yes</b> | <b>Probably yes</b><br>Generally balanced baseline characteristics across groups |
| Henry (2011) <sup>(82)</sup>        | <b>Probably yes</b><br>Randomised, double-blind                            | <b>Probably yes</b><br>Randomised, double-blind                            | <b>Definitely yes</b><br>Double-blind (participant, investigator) | <b>Definitely yes</b> | <b>Definitely no</b><br>There were 15.0% (3/20) and 6.3% (1/16) patients in incretin and control groups with missing outcome data, respectively; missing outcome data were not balanced across treatment groups                                                            | <b>Definitely yes</b> | <b>Probably yes</b><br>Generally balanced baseline characteristics across groups |
| Henry (2012) <sup>(83)</sup>        | <b>Definitely yes</b><br>Using a central randomisation system (by site)    | <b>Definitely yes</b><br>Using a central randomisation system (by site)    | <b>Probably yes</b><br>Double-blind (details not reported)        | <b>Definitely yes</b> | <b>Probably no</b><br>There were 15.2% (34/224) and 13.7% (14/102) patients in incretin and control groups with missing outcome data, respectively                                                                                                                         | <b>Definitely yes</b> | <b>Probably yes</b><br>Generally balanced baseline characteristics across groups |
| Henry (2014) <sup>(84,85)</sup>     | <b>Probably yes</b><br>Randomised, double-blind                            | <b>Probably yes</b><br>Randomised, double-blind                            | <b>Definitely yes</b><br>Double-blind (participant, investigator) | <b>Definitely yes</b> | <b>Definitely no</b><br>There were 24.9% (191/767) and 30.0% (169/565) patients in incretin and control groups with missing outcome data, respectively                                                                                                                     | <b>Definitely yes</b> | <b>Probably yes</b><br>Generally balanced baseline characteristics across groups |
| Hermans (2012) <sup>(86,87)</sup>   | <b>Probably yes</b><br>Randomised, double-blind                            | <b>Probably yes</b><br>Randomised, double-blind                            | <b>Definitely yes</b><br>Double-blind (participant, investigator) | <b>Definitely yes</b> | <b>Definitely no</b><br>There were 19.0% (28/147) and 23% (32/139) patients in incretin and control groups with missing outcome data, respectively                                                                                                                         | <b>Definitely yes</b> | <b>Probably yes</b><br>Generally balanced baseline characteristics across groups |
| Hirose (2015) <sup>(88,89)</sup>    | <b>Probably yes</b><br>Randomised, double-blind                            | <b>Probably yes</b><br>Randomised, double-blind                            | <b>Definitely yes</b><br>Double-blind (participant, investigator) | <b>Definitely yes</b> | <b>Definitely yes</b><br>There were 2.6% (2/78) and 3.9% (3/76) patients in incretin and control groups with missing outcome data, respectively; missing outcome data were generally balanced across treatment groups, with similar reasons for missing data across groups | <b>Definitely yes</b> | <b>Probably yes</b><br>Generally balanced baseline characteristics across groups |
| Hollander (2011) <sup>(90-92)</sup> | <b>Definitely yes</b><br>Using a blocked randomisation schedule            | <b>Definitely yes</b><br>Using an interactive voice response system        | <b>Definitely yes</b><br>Double-blind (participant, investigator) | <b>Definitely yes</b> | <b>Definitely no</b><br>There were 21.5% (82/381) and 25.0% (46/184) patients in incretin and control groups with missing outcome data, respectively                                                                                                                       | <b>Definitely yes</b> | <b>Probably yes</b><br>Generally balanced baseline characteristics across groups |



|                                      |                                                                         |                                                                                                                                           |                                                                   |                       |                                                                                                                                                                                                                                                                               |                       |                                                                                  |
|--------------------------------------|-------------------------------------------------------------------------|-------------------------------------------------------------------------------------------------------------------------------------------|-------------------------------------------------------------------|-----------------------|-------------------------------------------------------------------------------------------------------------------------------------------------------------------------------------------------------------------------------------------------------------------------------|-----------------------|----------------------------------------------------------------------------------|
| Hollander (2013) <sup>(93)</sup>     | <b>Definitely yes</b><br>Using a central randomisation system (by site) | <b>Definitely yes</b><br>Using a central randomisation system (by site); the randomisation code was not broken until the end of the study | <b>Definitely yes</b><br>Double-blind (participant, investigator) | <b>Definitely yes</b> | <b>Definitely no</b><br>There were 9.9% (15/151) and 22.1% (34/154) patients in incretin and control groups with missing outcome data, respectively                                                                                                                           | <b>Definitely yes</b> | <b>Probably yes</b><br>Generally balanced baseline characteristics across groups |
| Home (2015) <sup>(94)</sup>          | <b>Definitely yes</b><br>Using an interactive voice response system     | <b>Definitely yes</b><br>Using an interactive voice response system                                                                       | <b>Definitely yes</b><br>Double-blind (participant, investigator) | <b>Definitely yes</b> | <b>Definitely no</b><br>There were 18.1% (51/281) and 22.0% (89/404) patients in incretin and control groups with missing outcome data, respectively                                                                                                                          | <b>Definitely yes</b> | <b>Probably yes</b><br>Generally balanced baseline characteristics across groups |
| Idorn (2015) <sup>(95)</sup>         | <b>Definitely yes</b><br>Using a computer-generated random sequence     | <b>Probably yes</b><br>Randomised, double-blind                                                                                           | <b>Definitely yes</b><br>Double-blind (participant, investigator) | <b>Definitely yes</b> | <b>Definitely no</b><br>There were 24% (6/25) and 9.0% (2/22) patients in incretin and control groups with missing outcome data, respectively                                                                                                                                 | <b>Definitely yes</b> | <b>Probably yes</b><br>Generally balanced baseline characteristics across groups |
| Inagaki (2012) <sup>(96,97)</sup>    | <b>Definitely yes</b><br>Using a computer-generated random sequence     | <b>Definitely yes</b><br>Using an interactive voice response system                                                                       | <b>Definitely no</b><br>Open label                                | <b>Definitely yes</b> | <b>Probably yes</b><br>There were 10.2% (22/215) and 5.2% (11/212) patients in incretin and control groups with missing outcome data, respectively; missing outcome data were generally balanced across treatment groups, with similar reasons for missing data across groups | <b>Definitely yes</b> | <b>Probably yes</b><br>Generally balanced baseline characteristics across groups |
| Iwamoto (2010) <sup>(98)</sup>       | <b>Probably yes</b><br>Randomised, double-blind                         | <b>Probably yes</b><br>Randomised, double-blind                                                                                           | <b>Probably yes</b><br>Double-blind (details not reported)        | <b>Definitely yes</b> | <b>Probably yes</b><br>There were 4.8% (9/188) and 5.2% (10/192) patients in incretin and control groups with missing outcome data, respectively; missing outcome data were generally balanced across treatment groups, with similar reasons for missing data across groups   | <b>Definitely yes</b> | <b>Probably yes</b><br>Generally balanced baseline characteristics across groups |
| Kadowaki (2009) <sup>(99)</sup>      | <b>Definitely yes</b><br>Using a dynamic allocation algorithm           | <b>Probably yes</b><br>Randomised, double-blind                                                                                           | <b>Definitely yes</b><br>Double-blind (participant, investigator) | <b>Definitely yes</b> | <b>Definitely no</b><br>There were 13.3% (15/113) and 2.5% (1/40) patients in incretin and control groups with missing outcome data, respectively; missing outcome data were not balanced across treatment groups                                                             | <b>Definitely yes</b> | <b>Probably yes</b><br>Generally balanced baseline characteristics across groups |
| Kadowaki (2011) <sup>(100,101)</sup> | <b>Definitely yes</b><br>Using a dynamic allocation algorithm           | <b>Probably yes</b><br>Randomised, double-blind                                                                                           | <b>Definitely yes</b><br>Double-blind (participant, investigator) | <b>Definitely yes</b> | <b>Definitely no</b><br>There were 18.6% (27/145) and 5.6% (2/36) patients in incretin and control groups with missing outcome data, respectively; missing outcome data were not balanced across treatment groups                                                             | <b>Definitely yes</b> | <b>Probably yes</b><br>Generally balanced baseline characteristics across groups |
| Kadowaki (2013a) <sup>(102)</sup>    | <b>Definitely yes</b><br>Using a computer-generated random sequence     | <b>Probably yes</b><br>Randomised, double-blind                                                                                           | <b>Definitely yes</b><br>Double-blind (participant, investigator) | <b>Definitely yes</b> | <b>Definitely yes</b><br>There were 3.1% (4/129) and 5.8% (8/137) patients in incretin and control groups with missing outcome data, respectively; missing outcome data were generally balanced across treatment groups, with similar reasons for missing data across         | <b>Definitely yes</b> | <b>Probably yes</b><br>Generally balanced baseline characteristics across groups |

groups

|                                       |                                                                         |                                                                         |                                                                   |                       |                                                                                                                                                                                                                                                                               |                       |                                                                                  |
|---------------------------------------|-------------------------------------------------------------------------|-------------------------------------------------------------------------|-------------------------------------------------------------------|-----------------------|-------------------------------------------------------------------------------------------------------------------------------------------------------------------------------------------------------------------------------------------------------------------------------|-----------------------|----------------------------------------------------------------------------------|
| Kadowaki (2013b) <sup>(103,104)</sup> | <b>Probably yes</b><br>Randomised, double-blind                         | <b>Probably yes</b><br>Randomised, double-blind                         | <b>Definitely yes</b><br>Double-blind (participant, investigator) | <b>Definitely yes</b> | <b>Definitely yes</b><br>There were 4.9% (5/103) and 3.0% (3/101) patients in incretin and control groups with missing outcome data, respectively; missing outcome data were generally balanced across treatment groups, with similar reasons for missing data across groups  | <b>Definitely yes</b> | <b>Probably yes</b><br>Generally balanced baseline characteristics across groups |
| Kadowaki (2013c) <sup>(105,106)</sup> | <b>Probably yes</b><br>Randomised, double-blind                         | <b>Probably yes</b><br>Randomised, double-blind                         | <b>Definitely yes</b><br>Double-blind (participant, investigator) | <b>Definitely yes</b> | <b>Definitely yes</b><br>There were 3.7% (9/244) and 3.8% (3/80) patients in incretin and control groups with missing outcome data, respectively; missing outcome data were generally balanced across treatment groups, with similar reasons for missing data across groups   | <b>Definitely yes</b> | <b>Probably yes</b><br>Generally balanced baseline characteristics across groups |
| Kadowaki (2014) <sup>(107)</sup>      | <b>Probably yes</b><br>Randomised, double-blind                         | <b>Probably yes</b><br>Randomised, double-blind                         | <b>Definitely yes</b><br>Double-blind (participant, investigator) | <b>Definitely yes</b> | <b>Definitely yes</b><br>There were 1.0% (1/96) and 3.1% (3/98) patients in incretin and control groups with missing outcome data, respectively; missing outcome data were generally balanced across treatment groups, with similar reasons for missing data across groups    | <b>Definitely yes</b> | <b>Probably yes</b><br>Generally balanced baseline characteristics across groups |
| Kaku (2010) <sup>(108)</sup>          | <b>Probably yes</b><br>Randomised, double-blind                         | <b>Probably yes</b><br>Randomised, double-blind                         | <b>Probably yes</b><br>Double-blind (details not reported)        | <b>Definitely yes</b> | <b>Definitely no</b><br>There were 5.1% (9/176) and 16.0% (14/88) patients in incretin and control groups with missing outcome data, respectively; missing outcome data were not balanced across treatment groups                                                             | <b>Definitely yes</b> | <b>Probably yes</b><br>Generally balanced baseline characteristics across groups |
| Kaku (2016) <sup>(109)</sup>          | <b>Definitely yes</b><br>Using an interactive voice/web response system | <b>Definitely yes</b><br>Using an interactive voice/web response system | <b>Definitely no</b><br>Open label                                | <b>Definitely yes</b> | <b>Probably yes</b><br>There were 9.1% (22/243) and 7.5% (9/120) patients in incretin and control groups with missing outcome data, respectively; missing outcome data were generally balanced across treatment groups, with similar reasons for missing data across groups   | <b>Definitely yes</b> | <b>Probably yes</b><br>Generally balanced baseline characteristics across groups |
| Kawamori (2012) <sup>(110-112)</sup>  | <b>Probably yes</b><br>Randomised, double-blind                         | <b>Probably yes</b><br>Randomised, double-blind                         | <b>Probably yes</b><br>Double-blind (details not reported)        | <b>Definitely yes</b> | <b>Definitely yes</b><br>There were 2.5% (8/319) and 4.1% (10/242) patients in incretin and control groups with missing outcome data, respectively; missing outcome data were generally balanced across treatment groups, with similar reasons for missing data across groups | <b>Definitely yes</b> | <b>Probably yes</b><br>Generally balanced baseline characteristics across groups |
| Kikuchi (2009) <sup>(113)</sup>       | <b>Probably yes</b><br>Randomised, double-blind                         | <b>Probably yes</b><br>Randomised, double-blind                         | <b>Definitely yes</b><br>Double-blind (participant, investigator) | <b>Definitely yes</b> | <b>Definitely no</b><br>There were 2.7% (6/219) and 8.3% (6/72) patients in incretin and control groups with missing outcome data, respectively; missing outcome data were not balanced across treatment                                                                      | <b>Definitely yes</b> | <b>Probably yes</b><br>Generally balanced baseline characteristics across groups |

groups

|                                              |                                                                        |                                                                   |                                                                   |                       |                                                                                                                                                                                                                                                                              |                       |                                                                                  |
|----------------------------------------------|------------------------------------------------------------------------|-------------------------------------------------------------------|-------------------------------------------------------------------|-----------------------|------------------------------------------------------------------------------------------------------------------------------------------------------------------------------------------------------------------------------------------------------------------------------|-----------------------|----------------------------------------------------------------------------------|
| Kikuchi (2010) <sup>(114)</sup>              | <b>Definitely yes</b><br>Using a dynamic randomisation                 | <b>Probably yes</b><br>Randomised, double-blind                   | <b>Probably yes</b><br>Double-blind (details not reported)        | <b>Definitely yes</b> | <b>Definitely yes</b><br>There were 2.9% (3/102) and 4.0% (4/100) patients in incretin and control groups with missing outcome data, respectively; missing outcome data were generally balanced across treatment groups, with similar reasons for missing data across groups | <b>Definitely yes</b> | <b>Probably yes</b><br>Generally balanced baseline characteristics across groups |
| Kim (2015) <sup>(115)</sup>                  | <b>Probably yes</b><br>Randomised, double-blind                        | <b>Probably yes</b><br>Randomised, double-blind                   | <b>Definitely yes</b><br>Double-blind (participant, investigator) | <b>Definitely yes</b> | <b>Probably no</b><br>There were 12.5% (17/136) and 14.7% (10/68) patients in incretin and control groups with missing outcome data, respectively                                                                                                                            | <b>Definitely yes</b> | <b>Probably yes</b><br>Generally balanced baseline characteristics across groups |
| Kim (2016) <sup>(116)</sup>                  | <b>Probably yes</b><br>Randomised, double-blind                        | <b>Probably no</b><br>Randomised, open label                      | <b>Definitely no</b><br>Open label                                | <b>Definitely yes</b> | <b>Definitely no</b><br>There were 12.0% (14/117) and 25.2% (28/111) patients in incretin and control groups with missing outcome data, respectively                                                                                                                         | <b>Definitely yes</b> | <b>Probably yes</b><br>Generally balanced baseline characteristics across groups |
| Kobayashi (2014) <sup>(117)</sup>            | <b>Definitely yes</b><br>Using a minimization method through a website | <b>Probably no</b><br>Randomised, open label                      | <b>Definitely no</b><br>Open label                                | <b>Definitely yes</b> | <b>Probably no</b><br>There were 11.7% (7/60) and 11.9% (7/59) patients in incretin and control groups with missing outcome data, respectively                                                                                                                               | <b>Definitely yes</b> | <b>Probably yes</b><br>Generally balanced baseline characteristics across groups |
| Kothny (2013) <sup>(118)</sup>               | <b>Definitely yes</b><br>Using an interactive response technology      | <b>Definitely yes</b><br>Using an interactive response technology | <b>Probably yes</b><br>Double-blind (details not reported)        | <b>Definitely yes</b> | <b>Probably no</b><br>There were 8.8% and 13.6% patients in incretin and control groups with missing outcome data, respectively                                                                                                                                              | <b>Definitely yes</b> | <b>Probably yes</b><br>Generally balanced baseline characteristics across groups |
| Lavalle-Gonzalez (2013) <sup>(119,120)</sup> | <b>Definitely yes</b><br>Using a computer-generated random sequence    | <b>Probably yes</b><br>Randomised, double-blind                   | <b>Definitely yes</b><br>Double-blind (participant, investigator) | <b>Definitely yes</b> | <b>Probably no</b><br>There were 12.8% (47/366) and 12.9% (118/918) patients in incretin and control groups with missing outcome data, respectively                                                                                                                          | <b>Definitely yes</b> | <b>Probably yes</b><br>Generally balanced baseline characteristics across groups |
| Liutkus (2010) <sup>(121)</sup>              | <b>Probably yes</b><br>Randomised, double-blind                        | <b>Probably yes</b><br>Randomised, double-blind                   | <b>Probably yes</b><br>Double-blind (details not reported)        | <b>Definitely yes</b> | <b>Definitely no</b><br>There were 13.5% (15/111) and 7.4% (4/54) patients in incretin and control groups with missing outcome data, respectively; missing outcome data were not balanced across treatment groups                                                            | <b>Definitely yes</b> | <b>Probably yes</b><br>Generally balanced baseline characteristics across groups |
| Lukashevich (2011) <sup>(122,123)</sup>      | <b>Probably yes</b><br>Randomised, double-blind                        | <b>Probably yes</b><br>Randomised, double-blind                   | <b>Probably yes</b><br>Double-blind (details not reported)        | <b>Definitely yes</b> | <b>Probably no</b><br>There were 11.8% (34/289) and 11.9% (27/226) patients in incretin and control groups with missing outcome data, respectively                                                                                                                           | <b>Definitely yes</b> | <b>Probably yes</b><br>Generally balanced baseline characteristics across groups |

|                                      |                                                                           |                                                                        |                                                                         |                       |                                                                                                                                                                                                                                                                                           |                       |                                                                                     |
|--------------------------------------|---------------------------------------------------------------------------|------------------------------------------------------------------------|-------------------------------------------------------------------------|-----------------------|-------------------------------------------------------------------------------------------------------------------------------------------------------------------------------------------------------------------------------------------------------------------------------------------|-----------------------|-------------------------------------------------------------------------------------|
| Lukashevich (2014) <sup>(124)</sup>  | <b>Probably yes</b><br>Randomised,<br>double-blind                        | <b>Probably yes</b><br>Randomised, double-blind                        | <b>Probably yes</b><br>Double-blind<br>(details not<br>reported)        | <b>Definitely yes</b> | <b>Definitely no</b><br>There were 8.9% (14/158) and 3.1% (5/160) patients in<br>incretin and control groups with missing outcome data,<br>respectively; missing outcome data were not balanced across<br>treatment groups                                                                | <b>Definitely yes</b> | <b>Probably yes</b><br>Generally balanced baseline<br>characteristics across groups |
| Macauley (2015) <sup>(125)</sup>     | <b>Probably yes</b><br>Randomised,<br>double-blind                        | <b>Probably yes</b><br>Randomised, double-blind                        | <b>Definitely yes</b><br>Double-blind<br>(participant,<br>investigator) | <b>Definitely yes</b> | <b>Probably no</b><br>There were 9% (2/22) and 13.6% (3/22) patients in incretin<br>and control groups with missing outcome data, respectively                                                                                                                                            | <b>Definitely yes</b> | <b>Probably yes</b><br>Generally balanced baseline<br>characteristics across groups |
| Marre (2009) <sup>(126)</sup>        | <b>Probably yes</b><br>Randomised,<br>double-blind                        | <b>Probably yes</b><br>Randomised, double-blind                        | <b>Probably yes</b><br>Double-blind<br>(details not<br>reported)        | <b>Definitely yes</b> | <b>Definitely no</b><br>There were 11.2% (78/695) and 19.9% (69/346) patients in<br>incretin and control groups with missing outcome data,<br>respectively                                                                                                                                | <b>Definitely yes</b> | <b>Probably yes</b><br>Generally balanced baseline<br>characteristics across groups |
| Mathieu (2014) <sup>(127)</sup>      | <b>Probably yes</b><br>Randomised,<br>double-blind                        | <b>Probably no</b><br>Randomised, open label                           | <b>Definitely no</b><br>Open label                                      | <b>Definitely yes</b> | <b>Probably no</b><br>There were 13.6% (12/88) and 15.7% (14/89) patients in<br>incretin and control groups with missing outcome data,<br>respectively                                                                                                                                    | <b>Definitely yes</b> | <b>Probably yes</b><br>Generally balanced baseline<br>characteristics across groups |
| Mathieu (2015) <sup>(128,129)</sup>  | <b>Probably yes</b><br>Randomised,<br>double-blind                        | <b>Probably yes</b><br>Randomised, double-blind                        | <b>Definitely yes</b><br>Double-blind<br>(participant,<br>investigator) | <b>Definitely yes</b> | <b>Probably yes</b><br>There were 10.6% (35/330) and 8.2% (27/330) patients in<br>incretin and control groups with missing outcome data,<br>respectively; missing outcome data were generally balanced<br>across treatment groups, with similar reasons for missing data<br>across groups | <b>Definitely yes</b> | <b>Probably yes</b><br>Generally balanced baseline<br>characteristics across groups |
| Matthaei (2015) <sup>(130,131)</sup> | <b>Probably yes</b><br>Randomised,<br>double-blind                        | <b>Probably yes</b><br>Randomised, double-blind                        | <b>Definitely yes</b><br>Double-blind<br>(participant,<br>investigator) | <b>Definitely yes</b> | <b>Probably yes</b><br>There were 7.2% (11/153) and 3.7% (6/162) patients in<br>incretin and control groups with missing outcome data,<br>respectively; missing outcome data were generally balanced<br>across treatment groups, with similar reasons for missing data<br>across groups   | <b>Definitely yes</b> | <b>Probably yes</b><br>Generally balanced baseline<br>characteristics across groups |
| Miyagawa (2015) <sup>(132)</sup>     | <b>Definitely yes</b><br>Using a<br>computer-generated<br>random sequence | <b>Definitely yes</b><br>Using an interactive voice<br>response system | <b>Definitely yes</b><br>Double-blind<br>(participant,<br>investigator) | <b>Definitely yes</b> | <b>Probably yes</b><br>There were 5.5% (23/417) and 10% (7/70) patients in incretin<br>and control groups with missing outcome data, respectively;<br>missing outcome data were generally balanced across<br>treatment groups, with similar reasons for missing data across<br>groups     | <b>Definitely yes</b> | <b>Probably yes</b><br>Generally balanced baseline<br>characteristics across groups |
| Moretto (2008) <sup>(133)</sup>      | <b>Definitely yes</b><br>Using a<br>computer-generated<br>random sequence | <b>Definitely yes</b><br>Using an interactive voice<br>response system | <b>Definitely yes</b><br>Double-blind<br>(participant,<br>investigator) | <b>Definitely yes</b> | <b>Probably no</b><br>There were 13.5% (21/155) and 11.5% (9/78) patients in<br>incretin and control groups with missing outcome data,<br>respectively                                                                                                                                    | <b>Definitely yes</b> | <b>Probably yes</b><br>Generally balanced baseline<br>characteristics across groups |

|                                         |                                                                                    |                                                                                    |                                                                   |                       |                                                                                                                                                                                                                     |                       |                                                                                  |
|-----------------------------------------|------------------------------------------------------------------------------------|------------------------------------------------------------------------------------|-------------------------------------------------------------------|-----------------------|---------------------------------------------------------------------------------------------------------------------------------------------------------------------------------------------------------------------|-----------------------|----------------------------------------------------------------------------------|
| Mori (2016) <sup>(134)</sup>            | <b>Probably yes</b><br>Randomised, double-blind                                    | <b>Probably no</b><br>Randomised, open label                                       | <b>Definitely no</b><br>Open label                                | <b>Definitely yes</b> | <b>Definitely no</b><br>There were 7.5% (3/40) and 15.8% (6/38) patients in incretin and control groups with missing outcome data, respectively; missing outcome data were not balanced across treatment groups     | <b>Definitely yes</b> | <b>Probably yes</b><br>Generally balanced baseline characteristics across groups |
| Moses (2016) <sup>(135)</sup>           | <b>Probably yes</b><br>Randomised, double-blind                                    | <b>Probably yes</b><br>Randomised, double-blind                                    | <b>Definitely yes</b><br>Double-blind (participant, investigator) | <b>Definitely yes</b> | <b>Definitely no</b><br>There were 6.6% (14/213) and 11.7% (25/214) patients in incretin and control groups with missing outcome data, respectively; missing outcome data were not balanced across treatment groups | <b>Definitely yes</b> | <b>Probably yes</b><br>Generally balanced baseline characteristics across groups |
| Nauck (2007) <sup>(136,137)</sup>       | <b>Definitely yes</b><br>Using a computer-generated randomisation table            | <b>Definitely yes</b><br>Using an automated voice response system                  | <b>Definitely no</b><br>Open label                                | <b>Definitely yes</b> | <b>Definitely no</b><br>There were 22.0% (56/255) and 10.8% (27/250) patients in incretin and control groups with missing outcome data, respectively                                                                | <b>Definitely yes</b> | <b>Probably yes</b><br>Generally balanced baseline characteristics across groups |
| Nauck (2009) <sup>(138,139)</sup>       | <b>Definitely yes</b><br>Using an interactive voice response system                | <b>Definitely yes</b><br>Using an interactive voice response system                | <b>Definitely yes</b><br>Double-blind (participant, investigator) | <b>Definitely yes</b> | <b>Definitely no</b><br>There were 19.4% (82/423) and 30.8% (32/104) patients in incretin and control groups with missing outcome data, respectively                                                                | <b>Definitely yes</b> | <b>Probably yes</b><br>Generally balanced baseline characteristics across groups |
| Nauck (2013a) <sup>(140,141)</sup>      | <b>Definitely yes</b><br>Using a telephone-based or web-based randomisation system | <b>Definitely yes</b><br>Using a telephone-based or web-based randomisation system | <b>Probably yes</b><br>Double-blind (details not reported)        | <b>Definitely yes</b> | <b>Definitely no</b><br>There were 47.3% (343/725) and 60.6% (222/366) patients in incretin and control groups with missing outcome data, respectively                                                              | <b>Definitely yes</b> | <b>Probably yes</b><br>Generally balanced baseline characteristics across groups |
| Nauck (2013b) <sup>(142)</sup>          | <b>Probably no</b><br>Randomised, open label**                                     | <b>Probably no</b><br>Randomised, open label                                       | <b>Definitely no</b><br>Open label                                | <b>Definitely yes</b> | <b>Definitely no</b><br>There were 21.2% (152/717) and 11.7% (39/332) patients in incretin and control groups with missing outcome data, respectively                                                               | <b>Definitely yes</b> | <b>Probably yes</b><br>Generally balanced baseline characteristics across groups |
| Nauck (2014) <sup>(143,144)</sup>       | <b>Probably yes</b><br>Randomised, double-blind                                    | <b>Probably yes</b><br>Randomised, double-blind                                    | <b>Probably yes</b><br>Double-blind (details not reported)        | <b>Definitely yes</b> | <b>Definitely no</b><br>There were 21.9% (212/921) and 36.7% (65/177) patients in incretin and control groups with missing outcome data, respectively                                                               | <b>Definitely yes</b> | <b>Probably yes</b><br>Generally balanced baseline characteristics across groups |
| Nauck (2016) <sup>(145)</sup>           | <b>Definitely yes</b><br>Using an interactive voice response system                | <b>Definitely yes</b><br>Using an interactive voice response system                | <b>Definitely yes</b><br>Double-blind (participant, investigator) | <b>Definitely yes</b> | <b>Definitely no</b><br>There were 21.1% (43/204) and 24.8% (26/105) patients in incretin and control groups with missing outcome data, respectively                                                                | <b>Definitely yes</b> | <b>Probably yes</b><br>Generally balanced baseline characteristics across groups |
| NCT00086515 (2010) <sup>(146,147)</sup> | <b>Probably yes</b><br>Randomised, double-blind                                    | <b>Probably yes</b><br>Randomised, double-blind                                    | <b>Definitely yes</b><br>Double-blind (participant, investigator) | <b>Definitely yes</b> | <b>Definitely no</b><br>There were 56.0% (260/464) and 53.6% (127/237) patients in incretin and control groups with missing outcome data, respectively                                                              | <b>Definitely yes</b> | <b>Probably yes</b><br>Generally balanced baseline characteristics across groups |

|                                 |                                                                     |                                                                     |                                                                   |                       |                                                                                                                                                                                                                                                                          |                       |                                                                                  |
|---------------------------------|---------------------------------------------------------------------|---------------------------------------------------------------------|-------------------------------------------------------------------|-----------------------|--------------------------------------------------------------------------------------------------------------------------------------------------------------------------------------------------------------------------------------------------------------------------|-----------------------|----------------------------------------------------------------------------------|
| NCT00095056 (2010)<br>(148)     | <b>Definitely yes</b><br>Using a computer-generated random sequence | <b>Probably yes</b><br>Randomised, double-blind                     | <b>Definitely yes</b><br>Double-blind (participant, investigator) | <b>Definitely yes</b> | <b>Probably no</b><br>There were 10.7% (13/121) and 9.8% (5/51) patients in incretin and control groups with missing outcome data, respectively                                                                                                                          | <b>Definitely yes</b> | <b>Probably yes</b><br>Generally balanced baseline characteristics across groups |
| NCT00106704 (2010)<br>(149,150) | <b>Definitely yes</b><br>Using an interactive voice response system | <b>Definitely yes</b><br>Using an interactive voice response system | <b>Definitely yes</b><br>Double-blind (participant, investigator) | <b>Definitely yes</b> | <b>Definitely no</b><br>There were 58.1% (129/222) and 68.5% (150/219) patients in incretin and control groups with missing outcome data, respectively                                                                                                                   | <b>Definitely yes</b> | <b>Probably yes</b><br>Generally balanced baseline characteristics across groups |
| NCT00289848 (2010)<br>(151,152) | <b>Definitely yes</b><br>Using a computer-generated random sequence | <b>Probably yes</b><br>Randomised, double-blind                     | <b>Definitely yes</b><br>Double-blind (participant, investigator) | <b>Definitely yes</b> | <b>Definitely no</b><br>There were 12.8% (45/352) and 25.3% (45/178) patients in incretin and control groups with missing outcome data, respectively; missing outcome data were not balanced across treatment groups                                                     | <b>Definitely yes</b> | <b>Probably yes</b><br>Generally balanced baseline characteristics across groups |
| NCT00305604 (2009)<br>(153,154) | <b>Definitely yes</b><br>Using a computer-generated random sequence | <b>Probably yes</b><br>Randomised, double-blind                     | <b>Definitely yes</b><br>Double-blind (participant, investigator) | <b>Definitely yes</b> | <b>Definitely no</b><br>There were 31.4% (32/102) and 45.2% (47/104) patients in incretin and control groups with missing outcome data, respectively                                                                                                                     | <b>Definitely yes</b> | <b>Probably yes</b><br>Generally balanced baseline characteristics across groups |
| NCT00337610 (2009)<br>(155,156) | <b>Definitely yes</b><br>Using a computer-generated random sequence | <b>Probably yes</b><br>Randomised, double-blind                     | <b>Definitely yes</b><br>Double-blind (participant, investigator) | <b>Definitely yes</b> | <b>Definitely no</b><br>There were 17.7% (17/96) and 14.9% (14/94) patients in incretin and control groups with missing outcome data, respectively                                                                                                                       | <b>Definitely yes</b> | <b>Probably yes</b><br>Generally balanced baseline characteristics across groups |
| NCT00511108 (2010)<br>(157,158) | <b>Definitely yes</b><br>Using an interactive voice response system | <b>Definitely yes</b><br>Using an interactive voice response system | <b>Definitely yes</b><br>Double-blind (participant, investigator) | <b>Definitely yes</b> | <b>Probably no</b><br>There were 10.6% (11/104) and 6.5% (7/107) patients in incretin and control groups with missing outcome data, respectively                                                                                                                         | <b>Definitely yes</b> | <b>Probably yes</b><br>Generally balanced baseline characteristics across groups |
| NCT00655863 (2013)<br>(159,160) | <b>Probably yes</b><br>Randomised, double-blind                     | <b>Probably yes</b><br>Randomised, double-blind                     | <b>Definitely yes</b><br>Double-blind (participant, investigator) | <b>Definitely yes</b> | <b>Definitely yes</b><br>There were 2.1% (1/47) and 0% (0/24) patients in incretin and control groups with missing outcome data, respectively; missing outcome data were generally balanced across treatment groups, with similar reasons for missing data across groups | <b>Definitely yes</b> | <b>Probably yes</b><br>Generally balanced baseline characteristics across groups |
| NCT00707993 (2013)<br>(161,162) | <b>Probably yes</b><br>Randomised, double-blind                     | <b>Probably yes</b><br>Randomised, double-blind                     | <b>Definitely yes</b><br>Double-blind (participant, investigator) | <b>Definitely yes</b> | <b>Definitely no</b><br>There were 40.0% (89/222) and 42.9% (94/219) patients in incretin and control groups with missing outcome data, respectively                                                                                                                     | <b>Definitely yes</b> | <b>Probably yes</b><br>Generally balanced baseline characteristics across groups |
| NCT00713830 (2016)<br>(163)     | <b>Probably yes</b><br>Randomised, double-blind                     | <b>Probably yes</b><br>Randomised, double-blind                     | <b>Definitely yes</b><br>Double-blind (participant, investigator) | <b>Definitely yes</b> | <b>Definitely no</b><br>There were 30.9% (177/573) and 28.7% (82/286) patients in incretin and control groups with missing outcome data, respectively                                                                                                                    | <b>Definitely yes</b> | <b>Probably yes</b><br>Generally balanced baseline characteristics across groups |

|                                 |                                                    |                                                 |                                                                         |                       |                                                                                                                                                                                                                                                                                          |                       |                                                                                     |
|---------------------------------|----------------------------------------------------|-------------------------------------------------|-------------------------------------------------------------------------|-----------------------|------------------------------------------------------------------------------------------------------------------------------------------------------------------------------------------------------------------------------------------------------------------------------------------|-----------------------|-------------------------------------------------------------------------------------|
| NCT00715624 (2016)<br>(164)     | <b>Probably yes</b><br>Randomised,<br>double-blind | <b>Probably yes</b><br>Randomised, double-blind | <b>Definitely yes</b><br>Double-blind<br>(participant,<br>investigator) | <b>Definitely yes</b> | <b>Definitely no</b><br>There were 35.2% (116/329) and 31.1% (52/167) patients in<br>incretin and control groups with missing outcome data,<br>respectively                                                                                                                              | <b>Definitely yes</b> | <b>Probably yes</b><br>Generally balanced baseline<br>characteristics across groups |
| NCT00800683 (2011)<br>(165)     | <b>Probably yes</b><br>Randomised,<br>double-blind | <b>Probably yes</b><br>Randomised, double-blind | <b>Probably yes</b><br>Double-blind<br>(details not<br>reported)        | <b>Definitely yes</b> | <b>Definitely no</b><br>There were 27.9% (19/68) and 26.1% (17/65) patients in<br>incretin and control groups with missing outcome data,<br>respectively                                                                                                                                 | <b>Definitely yes</b> | <b>Probably yes</b><br>Generally balanced baseline<br>characteristics across groups |
| NCT00819091 (2011)<br>(166,167) | <b>Probably yes</b><br>Randomised,<br>double-blind | <b>Probably yes</b><br>Randomised, double-blind | <b>Probably yes</b><br>Double-blind<br>(details not<br>reported)        | <b>Definitely yes</b> | <b>Probably yes</b><br>There were 6.2% (10/161) and 8.3% (7/84) patients in incretin<br>and control groups with missing outcome data, respectively;<br>missing outcome data were generally balanced across<br>treatment groups, with similar reasons for missing data across<br>groups   | <b>Definitely yes</b> | <b>Probably yes</b><br>Generally balanced baseline<br>characteristics across groups |
| NCT00839527 (2014)<br>(168)     | <b>Probably yes</b><br>Randomised,<br>double-blind | <b>Probably yes</b><br>Randomised, double-blind | <b>Definitely yes</b><br>Double-blind<br>(participant,<br>investigator) | <b>Definitely yes</b> | <b>Definitely no</b><br>There were 66.8% (181/271) and 66.8% (262/392) patients in<br>incretin and control groups with missing outcome data,<br>respectively                                                                                                                             | <b>Definitely yes</b> | <b>Probably yes</b><br>Generally balanced baseline<br>characteristics across groups |
| NCT00881530 (2014)<br>(169,170) | <b>Probably no</b><br>Randomised, open label       | <b>Probably no</b><br>Randomised, open label    | <b>Definitely no</b><br>Open label                                      | <b>Definitely yes</b> | <b>Probably yes</b><br>There were 3.6% (2/56) and 7.8% (47/603) patients in incretin<br>and control groups with missing outcome data, respectively;<br>missing outcome data were generally balanced across<br>treatment groups, with similar reasons for missing data across<br>groups   | <b>Definitely yes</b> | <b>Probably yes</b><br>Generally balanced baseline<br>characteristics across groups |
| NCT01075282 (2014)<br>(171)     | <b>Probably no</b><br>Randomised, open label       | <b>Probably no</b><br>Randomised, open label    | <b>Definitely no</b><br>Open label                                      | <b>Definitely yes</b> | <b>Probably no</b><br>There were 11.0% (60/545) and 9.4% (25/265) patients in<br>incretin and control groups with missing outcome data,<br>respectively                                                                                                                                  | <b>Definitely yes</b> | <b>Probably yes</b><br>Generally balanced baseline<br>characteristics across groups |
| NCT01318083 (2011)<br>(172,173) | <b>Probably yes</b><br>Randomised,<br>double-blind | <b>Probably yes</b><br>Randomised, double-blind | <b>Definitely yes</b><br>Double-blind<br>(participant,<br>investigator) | <b>Definitely yes</b> | <b>Definitely yes</b><br>There were 3.8% (8/209) and 4.9% (5/103) patients in incretin<br>and control groups with missing outcome data, respectively;<br>missing outcome data were generally balanced across<br>treatment groups, with similar reasons for missing data across<br>groups | <b>Definitely yes</b> | <b>Probably yes</b><br>Generally balanced baseline<br>characteristics across groups |
| NCT01644500 (2015)<br>(174)     | <b>Probably yes</b><br>Randomised,<br>double-blind | <b>Probably yes</b><br>Randomised, double-blind | <b>Definitely yes</b><br>Double-blind<br>(participant,<br>investigator) | <b>Definitely yes</b> | <b>Probably yes</b><br>There were 9.5% (51/536) and 6.3% (18/271) patients in<br>incretin and control groups with missing outcome data,<br>respectively; missing outcome data were generally balanced<br>across treatment groups, with similar reasons for missing data<br>across groups | <b>Definitely yes</b> | <b>Probably yes</b><br>Generally balanced baseline<br>characteristics across groups |

|                                     |                                                                     |                                                                          |                                                                   |                       |                                                                                                                                                                                                                                                                               |                       |                                                                                  |
|-------------------------------------|---------------------------------------------------------------------|--------------------------------------------------------------------------|-------------------------------------------------------------------|-----------------------|-------------------------------------------------------------------------------------------------------------------------------------------------------------------------------------------------------------------------------------------------------------------------------|-----------------------|----------------------------------------------------------------------------------|
| NCT01648582 (2015)<br>(175)         | <b>Probably no</b><br>Randomised, open label                        | <b>Probably no</b><br>Randomised, open label                             | <b>Definitely no</b><br>Open label                                | <b>Definitely yes</b> | <b>Definitely no</b><br>There were 13.1% (69/526) and 7.6% (2/263) patients in incretin and control groups with missing outcome data, respectively; missing outcome data were not balanced across treatment groups                                                            | <b>Definitely yes</b> | <b>Probably yes</b><br>Generally balanced baseline characteristics across groups |
| NCT01682759 (2016)<br>(176)         | <b>Probably yes</b><br>Randomised, double-blind                     | <b>Probably yes</b><br>Randomised, double-blind                          | <b>Definitely yes</b><br>Double-blind (participant, investigator) | <b>Definitely yes</b> | <b>Definitely no</b><br>There were 17.8% (67/376) and 18.4% (69/375) patients in incretin and control groups with missing outcome data, respectively                                                                                                                          | <b>Definitely yes</b> | <b>Probably yes</b><br>Generally balanced baseline characteristics across groups |
| NCT01717313 (2016)<br>(177)         | <b>Probably yes</b><br>Randomised, double-blind                     | <b>Probably yes</b><br>Randomised, double-blind                          | <b>Definitely yes</b><br>Double-blind (participant, investigator) | <b>Definitely yes</b> | <b>Definitely no</b><br>There were 18.8% (31/165) and 17.1% (28/164) patients in incretin and control groups with missing outcome data, respectively                                                                                                                          | <b>Definitely yes</b> | <b>Probably yes</b><br>Generally balanced baseline characteristics across groups |
| NCT01778049 (2016)<br>(178)         | <b>Probably yes</b><br>Randomised, double-blind                     | <b>Probably yes</b><br>Randomised, double-blind                          | <b>Probably yes</b><br>Double-blind (details not reported)        | <b>Definitely yes</b> | <b>Probably yes</b><br>There were 11.3% (27/240) and 7.9% (19/242) patients in incretin and control groups with missing outcome data, respectively; missing outcome data were generally balanced across treatment groups, with similar reasons for missing data across groups | <b>Definitely yes</b> | <b>Probably yes</b><br>Generally balanced baseline characteristics across groups |
| NCT01890122 (2016)<br>(179)         | <b>Probably yes</b><br>Randomised, double-blind                     | <b>Probably yes</b><br>Randomised, double-blind                          | <b>Definitely yes</b><br>Double-blind (participant, investigator) | <b>Definitely yes</b> | <b>Definitely no</b><br>There were 15.5% (50/322) and 26.5% (86/325) patients in incretin and control groups with missing outcome data, respectively                                                                                                                          | <b>Definitely yes</b> | <b>Probably yes</b><br>Generally balanced baseline characteristics across groups |
| Ning (2016) <sup>(180)</sup>        | <b>Probably yes</b><br>Randomised, double-blind                     | <b>Probably yes</b><br>Randomised, double-blind                          | <b>Definitely yes</b><br>Double-blind (participant, investigator) | <b>Definitely yes</b> | <b>Probably yes</b><br>There were 4.9% (13/263) and 6.8% (18/265) patients in incretin and control groups with missing outcome data, respectively; missing outcome data were generally balanced across treatment groups, with similar reasons for missing data across groups  | <b>Definitely yes</b> | <b>Probably yes</b><br>Generally balanced baseline characteristics across groups |
| Nowicki (2011) <sup>(181-183)</sup> | <b>Definitely yes</b><br>Using an interactive voice response system | <b>Definitely yes</b><br>Using an interactive voice response system      | <b>Probably yes</b><br>Double-blind (details not reported)        | <b>Definitely yes</b> | <b>Definitely no</b><br>There were 50.6% (43/85) and 41.2% (35/85) patients in incretin and control groups with missing outcome data, respectively                                                                                                                            | <b>Definitely yes</b> | <b>Probably yes</b><br>Generally balanced baseline characteristics across groups |
| Odawara (2014) <sup>(184)</sup>     | <b>Probably yes</b><br>Randomised, double-blind                     | <b>Probably yes</b><br>Randomised, double-blind                          | <b>Probably yes</b><br>Double-blind (details not reported)        | <b>Definitely yes</b> | <b>Definitely no</b><br>There were 2.9% (2/69) and 14.3% (10/70) patients in incretin and control groups with missing outcome data, respectively; missing outcome data were not balanced across treatment groups                                                              | <b>Definitely yes</b> | <b>Probably yes</b><br>Generally balanced baseline characteristics across groups |
| Oe (2015) <sup>(185)</sup>          | <b>Definitely yes</b><br>Using computer-generated and a             | <b>Definitely yes</b><br>Using computer-generated and a web-based system | <b>Definitely no</b><br>Open label                                | <b>Definitely yes</b> | <b>Definitely no</b><br>There were 24.0% (12/50) and 22.0% (11/50) patients in incretin and control groups with missing outcome data,                                                                                                                                         | <b>Definitely yes</b> | <b>Probably yes</b><br>Generally balanced baseline characteristics across groups |



|                                              |                                                                          |                                                                          |                                                                   |                       |                                                                                                                                                                                                                                                                              |                       |                                                                                  |
|----------------------------------------------|--------------------------------------------------------------------------|--------------------------------------------------------------------------|-------------------------------------------------------------------|-----------------------|------------------------------------------------------------------------------------------------------------------------------------------------------------------------------------------------------------------------------------------------------------------------------|-----------------------|----------------------------------------------------------------------------------|
|                                              | web-based system                                                         |                                                                          |                                                                   |                       | respectively                                                                                                                                                                                                                                                                 |                       |                                                                                  |
| Oyama (2016) <sup>(186)</sup>                | <b>Probably no</b><br>Randomised, open label                             | <b>Probably no</b><br>Randomised, open label                             | <b>Definitely no</b><br>Open label                                | <b>Definitely yes</b> | <b>Definitely no</b><br>There were 17.2% (40/232) and 16.5% (38/231) patients in incretin and control groups with missing outcome data, respectively                                                                                                                         | <b>Definitely yes</b> | <b>Probably yes</b><br>Generally balanced baseline characteristics across groups |
| Pan (2008) <sup>(187)</sup>                  | <b>Definitely yes</b><br>Using computer-generated and a web-based system | <b>Definitely yes</b><br>Using computer-generated and a web-based system | <b>Probably yes</b><br>Double-blind (details not reported)        | <b>Definitely yes</b> | <b>Probably no</b><br>There were 9.5% (42/441) and 12.7% (28/220) patients in incretin and control groups with missing outcome data, respectively                                                                                                                            | <b>Definitely yes</b> | <b>Probably yes</b><br>Generally balanced baseline characteristics across groups |
| Pan (2012) <sup>(188,189)</sup>              | <b>Definitely yes</b><br>Using a computer-generated random sequence      | <b>Probably yes</b><br>Randomised, double-blind                          | <b>Probably yes</b><br>Double-blind (details not reported)        | <b>Definitely yes</b> | <b>Definitely no</b><br>There were 7.7% (22/284) and 12.7% (36/284) patients in incretin and control groups with missing outcome data, respectively                                                                                                                          | <b>Definitely yes</b> | <b>Probably yes</b><br>Generally balanced baseline characteristics across groups |
| Pan (2016) <sup>(190)</sup>                  | <b>Definitely yes</b><br>Using an interactive voice response system      | <b>Definitely yes</b><br>Using an interactive voice response system      | <b>Definitely yes</b><br>Double-blind (participant, investigator) | <b>Definitely yes</b> | <b>Probably yes</b><br>There were 7.5% (19/252) and 9.1% (23/254) patients in incretin and control groups with missing outcome data, respectively; missing outcome data were generally balanced across treatment groups, with similar reasons for missing data across groups | <b>Definitely yes</b> | <b>Probably yes</b><br>Generally balanced baseline characteristics across groups |
| Perez-Monteverde (2011) <sup>(191,192)</sup> | <b>Probably yes</b><br>Randomised, double-blind                          | <b>Probably yes</b><br>Randomised, double-blind                          | <b>Probably yes</b><br>Double-blind (details not reported)        | <b>Definitely yes</b> | <b>Definitely no</b><br>There were 23.3% (57/244) and 19.3% (48/248) patients in incretin and control groups with missing outcome data, respectively                                                                                                                         | <b>Definitely yes</b> | <b>Probably yes</b><br>Generally balanced baseline characteristics across groups |
| Pfutzner (2011) <sup>(193-195)</sup>         | <b>Probably yes</b><br>Randomised, double-blind                          | <b>Probably yes</b><br>Randomised, double-blind                          | <b>Probably yes</b><br>Double-blind (details not reported)        | <b>Definitely yes</b> | <b>Definitely no</b><br>There were 31.6% (309/978) and 33.2% (109/328) patients in incretin and control groups with missing outcome data, respectively                                                                                                                       | <b>Definitely yes</b> | <b>Probably yes</b><br>Generally balanced baseline characteristics across groups |
| Pinget (2013) <sup>(196)</sup>               | <b>Definitely yes</b><br>Using an interactive voice response system      | <b>Definitely yes</b><br>Using an interactive voice response system      | <b>Probably yes</b><br>Double-blind (details not reported)        | <b>Definitely yes</b> | <b>Probably no</b><br>There were 10.8% (35/323) and 14.9% (24/161) patients in incretin and control groups with missing outcome data, respectively                                                                                                                           | <b>Definitely yes</b> | <b>Probably yes</b><br>Generally balanced baseline characteristics across groups |
| Pratley (2006) <sup>(197)</sup>              | <b>Probably yes</b><br>Randomised, double-blind                          | <b>Probably yes</b><br>Randomised, double-blind                          | <b>Probably yes</b><br>Double-blind (details not reported)        | <b>Definitely yes</b> | <b>Probably yes</b><br>There were 9.7% (7/72) and 7.1% (2/28) patients in incretin and control groups with missing outcome data, respectively; missing outcome data were generally balanced across treatment groups, with similar reasons for missing data across groups     | <b>Definitely yes</b> | <b>Probably yes</b><br>Generally balanced baseline characteristics across groups |

|                                      |                                                                     |                                                                     |                                                                   |                       |                                                                                                                                                                                                                                                                          |                       |                                                                                  |
|--------------------------------------|---------------------------------------------------------------------|---------------------------------------------------------------------|-------------------------------------------------------------------|-----------------------|--------------------------------------------------------------------------------------------------------------------------------------------------------------------------------------------------------------------------------------------------------------------------|-----------------------|----------------------------------------------------------------------------------|
| Pratley (2009a) <sup>(198,199)</sup> | <b>Definitely yes</b><br>Using an interactive voice response system | <b>Definitely yes</b><br>Using an interactive voice response system | <b>Definitely yes</b><br>Double-blind (participant, investigator) | <b>Definitely yes</b> | <b>Probably no</b><br>There were 11.6% (46/396) and 14.4% (14/97) patients in incretin and control groups with missing outcome data, respectively                                                                                                                        | <b>Definitely yes</b> | <b>Probably yes</b><br>Generally balanced baseline characteristics across groups |
| Pratley (2009b) <sup>(200,201)</sup> | <b>Probably yes</b><br>Randomised, double-blind                     | <b>Probably yes</b><br>Randomised, double-blind                     | <b>Definitely yes</b><br>Double-blind (participant, investigator) | <b>Definitely yes</b> | <b>Definitely no</b><br>There were 12.5% (50/401) and 37.4% (37/99) patients in incretin and control groups with missing outcome data, respectively                                                                                                                      | <b>Definitely yes</b> | <b>Probably yes</b><br>Generally balanced baseline characteristics across groups |
| Pratley (2013) <sup>(202)</sup>      | <b>Definitely yes</b><br>Using a central randomisation system       | <b>Probably yes</b><br>Randomised, double-blind                     | <b>Probably yes</b><br>Double-blind (details not reported)        | <b>Definitely yes</b> | <b>Definitely no</b><br>There were 20.4% (102/499) and 12.6% (33/261) patients in incretin and control groups with missing outcome data, respectively                                                                                                                    | <b>Definitely yes</b> | <b>Probably yes</b><br>Generally balanced baseline characteristics across groups |
| Pratley (2014) <sup>(203,204)</sup>  | <b>Probably yes</b><br>Randomised, double-blind                     | <b>Probably yes</b><br>Randomised, double-blind                     | <b>Probably yes</b><br>Double-blind (details not reported)        | <b>Definitely yes</b> | <b>Definitely no</b><br>There were 24.2% (107/442) and 12.0% (69/326) patients in incretin and control groups with missing outcome data, respectively                                                                                                                    | <b>Definitely yes</b> | <b>Probably yes</b><br>Generally balanced baseline characteristics across groups |
| Probstfield (2016) <sup>(205)</sup>  | <b>Probably no</b><br>Randomised, open label                        | <b>Probably no</b><br>Randomised, open label                        | <b>Definitely no</b><br>Open label                                | <b>Definitely yes</b> | <b>Probably yes</b><br>There were 5.8% (3/52) and 6.0% (3/50) patients in incretin and control groups with missing outcome data, respectively; missing outcome data were generally balanced across treatment groups, with similar reasons for missing data across groups | <b>Definitely yes</b> | <b>Probably yes</b><br>Generally balanced baseline characteristics across groups |
| Raz (2012) <sup>(206)</sup>          | <b>Probably yes</b><br>Randomised, double-blind                     | <b>Probably yes</b><br>Randomised, double-blind                     | <b>Probably yes</b><br>Double-blind (details not reported)        | <b>Definitely yes</b> | <b>Probably no</b><br>There were 10.0% (25/249) and 10.5% (13/124) patients in incretin and control groups with missing outcome data, respectively                                                                                                                       | <b>Definitely yes</b> | <b>Probably yes</b><br>Generally balanced baseline characteristics across groups |
| Reasner (2011) <sup>(207-209)</sup>  | <b>Probably yes</b><br>Randomised, double-blind                     | <b>Probably yes</b><br>Randomised, double-blind                     | <b>Probably yes</b><br>Double-blind (details not reported)        | <b>Definitely yes</b> | <b>Definitely no</b><br>There were 22.7% (142/625) and 22.4% (139/621) patients in incretin and control groups with missing outcome data, respectively                                                                                                                   | <b>Definitely yes</b> | <b>Probably yes</b><br>Generally balanced baseline characteristics across groups |
| Riddle (2013) <sup>(210)</sup>       | <b>Definitely yes</b><br>Using an interactive voice response system | <b>Definitely yes</b><br>Using an interactive voice response system | <b>Probably yes</b><br>Double-blind (details not reported)        | <b>Definitely yes</b> | <b>Definitely no</b><br>There were 16.1% (53/329) and 12.0% (20/167) patients in incretin and control groups with missing outcome data, respectively                                                                                                                     | <b>Definitely yes</b> | <b>Probably yes</b><br>Generally balanced baseline characteristics across groups |
| Roden (2015) <sup>(211-213)</sup>    | <b>Probably yes</b><br>Randomised, double-blind                     | <b>Probably yes</b><br>Randomised, double-blind                     | <b>Probably yes</b><br>Double-blind (details not reported)        | <b>Definitely yes</b> | <b>Definitely no</b><br>There were 61.0% (136/223) and 39.5% (267/676) patients in incretin and control groups with missing outcome data, respectively                                                                                                                   | <b>Definitely yes</b> | <b>Probably yes</b><br>Generally balanced baseline characteristics across groups |

|                                         |                                                                                                         |                                                                                     |                                                                   |                       |                                                                                                                                                                                                                                                                              |                       |                                                                                  |
|-----------------------------------------|---------------------------------------------------------------------------------------------------------|-------------------------------------------------------------------------------------|-------------------------------------------------------------------|-----------------------|------------------------------------------------------------------------------------------------------------------------------------------------------------------------------------------------------------------------------------------------------------------------------|-----------------------|----------------------------------------------------------------------------------|
| Rosenstock (2008) <sup>(214,215)</sup>  | <b>Probably yes</b><br>Randomised, double-blind                                                         | <b>Probably yes</b><br>Randomised, double-blind                                     | <b>Probably yes</b><br>Double-blind (details not reported)        | <b>Definitely yes</b> | <b>Definitely no</b><br>There were 16.2% (44/271) and 17.9% (12/67) patients in incretin and control groups with missing outcome data, respectively                                                                                                                          | <b>Definitely yes</b> | <b>Probably yes</b><br>Generally balanced baseline characteristics across groups |
| Rosenstock (2009) <sup>(216,217)</sup>  | <b>Definitely yes</b><br>Using an interactive voice response system                                     | <b>Definitely yes</b><br>Using an interactive voice response system                 | <b>Definitely yes</b><br>Double-blind (participant, investigator) | <b>Definitely yes</b> | <b>Definitely no</b><br>There were 18.5% (48/260) and 17.7% (23/130) patients in incretin and control groups with missing outcome data, respectively                                                                                                                         | <b>Definitely yes</b> | <b>Probably yes</b><br>Generally balanced baseline characteristics across groups |
| Rosenstock (2013a) <sup>(218-220)</sup> | <b>Probably yes</b><br>Randomised, double-blind                                                         | <b>Probably yes</b><br>Randomised, double-blind                                     | <b>Probably yes</b><br>Double-blind (details not reported)        | <b>Definitely yes</b> | <b>Definitely no</b><br>There were 24.8% (76/306) and 25.3% (24/95) patients in incretin and control groups with missing outcome data, respectively                                                                                                                          | <b>Definitely yes</b> | <b>Probably yes</b><br>Generally balanced baseline characteristics across groups |
| Rosenstock (2013b) <sup>(221,222)</sup> | <b>Probably yes</b><br>Randomised, double-blind                                                         | <b>Probably yes</b><br>Randomised, double-blind                                     | <b>Probably yes</b><br>Double-blind (details not reported)        | <b>Definitely yes</b> | <b>Probably yes</b><br>There were 4.5% (19/424) and 7.0% (66/71) patients in incretin and control groups with missing outcome data, respectively; missing outcome data were generally balanced across treatment groups, with similar reasons for missing data across groups  | <b>Definitely yes</b> | <b>Probably yes</b><br>Generally balanced baseline characteristics across groups |
| Rosenstock (2014) <sup>(223)</sup>      | <b>Probably yes</b><br>Randomised, double-blind                                                         | <b>Probably yes</b><br>Randomised, double-blind                                     | <b>Probably yes</b><br>Double-blind (details not reported)        | <b>Definitely yes</b> | <b>Probably no</b><br>There were 12.9%(74/573) and 10.8% (31/286) patients in incretin and control groups with missing outcome data, respectively, respectively                                                                                                              | <b>Definitely yes</b> | <b>Probably yes</b><br>Generally balanced baseline characteristics across groups |
| Rosenstock (2015) <sup>(224)</sup>      | <b>Definitely yes</b><br>Using a centralized blocked randomisation schedule                             | <b>Probably yes</b><br>Randomised, double-blind                                     | <b>Probably yes</b><br>Double-blind (details not reported)        | <b>Definitely yes</b> | <b>Probably yes</b><br>There were 7.0%(25/355) and 10.6% (19/179) patients in incretin and control groups with missing outcome data, respectively; missing outcome data were generally balanced across treatment groups, with similar reasons for missing data across groups | <b>Definitely yes</b> | <b>Probably yes</b><br>Generally balanced baseline characteristics across groups |
| Rosenstock (2016a) <sup>(225)</sup>     | <b>Definitely yes</b><br>Using an interactive voice/Web response system (IVRS/IWRS)                     | <b>Definitely yes</b><br>Using an interactive voice/Web response system (IVRS/IWRS) | <b>Definitely yes</b><br>Double-blind (participant, investigator) | <b>Definitely yes</b> | <b>Definitely yes</b><br>There were 6.8%(11/161) and 1.9% (3/162) patients in incretin and control groups with missing outcome data, respectively; missing outcome data were generally balanced across treatment groups, with similar reasons for missing data across groups | <b>Definitely yes</b> | <b>Probably yes</b><br>Generally balanced baseline characteristics across groups |
| Rosenstock (2016b) <sup>(226,227)</sup> | <b>Definitely yes</b><br>Using an interactive voice/Web response system generated patient randomisation | <b>Definitely yes</b><br>Using an interactive voice/Web response system             | <b>Definitely no</b><br>Open label                                | <b>Definitely yes</b> | <b>Definitely no</b><br>There were 6.0%(56/936) and 12.4% (29/234) patients in incretin and control groups with missing outcome data, respectively; missing outcome data were not balanced across treatment groups                                                           | <b>Definitely yes</b> | <b>Probably yes</b><br>Generally balanced baseline characteristics across groups |

|                                          |                                                                                                                |                                                                                                      |                                                                   |                       |                                                                                                                                                                                                                                                                                |                       |                                                                                  |
|------------------------------------------|----------------------------------------------------------------------------------------------------------------|------------------------------------------------------------------------------------------------------|-------------------------------------------------------------------|-----------------------|--------------------------------------------------------------------------------------------------------------------------------------------------------------------------------------------------------------------------------------------------------------------------------|-----------------------|----------------------------------------------------------------------------------|
| Ross (2012) <sup>(228,229)</sup>         | <b>Definitely yes</b><br>Using a central interactive voice/web response system                                 | <b>Definitely yes</b><br>Using a central interactive voice/web response system                       | <b>Definitely yes</b><br>Double-blind (participant, investigator) | <b>Definitely yes</b> | <b>Probably yes</b><br>There were 5.8% (26/447) and 2.3% (1/44) patients in incretin and control groups with missing outcome data, respectively; missing outcome data were generally balanced across treatment groups, with similar reasons for missing data across groups     | <b>Definitely yes</b> | <b>Probably yes</b><br>Generally balanced baseline characteristics across groups |
| Russell-Jones (2012) <sup>(230)</sup>    | <b>Definitely yes</b><br>Using a computer-generated random sequence using an interactive voice response system | <b>Definitely yes</b><br>Using an interactive voice response system                                  | <b>Definitely yes</b><br>Double-blind (participant, investigator) | <b>Definitely yes</b> | <b>Probably no</b><br>There were 10.0% (66/657) and 11.0% (18/163) patients in incretin and control groups with missing outcome data, respectively                                                                                                                             | <b>Definitely yes</b> | <b>Probably yes</b><br>Generally balanced baseline characteristics across groups |
| Scherbaum (2008) <sup>(231,232)</sup>    | <b>Probably yes</b><br>Randomised, double-blind                                                                | <b>Probably yes</b><br>Randomised, double-blind                                                      | <b>Probably yes</b><br>Double-blind (details not reported)        | <b>Definitely yes</b> | <b>Definitely no</b><br>There were 14.7% (10/68) and 20.6% (13/63) patients in incretin and control groups with missing outcome data, respectively                                                                                                                             | <b>Definitely yes</b> | <b>Probably yes</b><br>Generally balanced baseline characteristics across groups |
| Schernthaler (2013) <sup>(233,234)</sup> | <b>Definitely yes</b><br>Using a computer-generated randomisation schedule                                     | <b>Definitely yes</b><br>Using an Interactive Voice Response System/ Interactive Web Response System | <b>Definitely yes</b><br>Double-blind (participant, investigator) | <b>Definitely yes</b> | <b>Definitely no</b><br>There were 44.4% (168/378) and 32.6% (123/377) patients in incretin and control groups with missing outcome data, respectively                                                                                                                         | <b>Definitely yes</b> | <b>Probably yes</b><br>Generally balanced baseline characteristics across groups |
| Schernthaler (2015) <sup>(235,236)</sup> | <b>Definitely yes</b><br>Using an interactive web response system                                              | <b>Definitely yes</b><br>Using an interactive web response system                                    | <b>Definitely yes</b><br>Double-blind (participant, investigator) | <b>Definitely yes</b> | <b>Definitely no</b><br>There were 19.7% (71/360) and 20.8% (75/360) patients in incretin and control groups with missing outcome data, respectively                                                                                                                           | <b>Definitely yes</b> | <b>Probably yes</b><br>Generally balanced baseline characteristics across groups |
| Schweizer (2007) <sup>(237)</sup>        | <b>Probably yes</b><br>Randomised, double-blind                                                                | <b>Probably yes</b><br>Randomised, double-blind                                                      | <b>Probably yes</b><br>Double-blind (details not reported)        | <b>Definitely yes</b> | <b>Definitely no</b><br>There were 28.1% (148/526) and 24.8% (63/254) patients in incretin and control groups with missing outcome data, respectively                                                                                                                          | <b>Definitely yes</b> | <b>Probably yes</b><br>Generally balanced baseline characteristics across groups |
| Schweizer (2009) <sup>(238)</sup>        | <b>Probably yes</b><br>Randomised, double-blind                                                                | <b>Probably yes</b><br>Randomised, double-blind                                                      | <b>Probably yes</b><br>Double-blind (details not reported)        | <b>Definitely yes</b> | <b>Definitely no</b><br>There were 16.6% (28/169) and 16.3% (27/166) patients in incretin and control groups with missing outcome data, respectively                                                                                                                           | <b>Definitely yes</b> | <b>Probably yes</b><br>Generally balanced baseline characteristics across groups |
| Seck (2010) <sup>(239-241)</sup>         | <b>Definitely yes</b><br>Using computer-generated allocation schedule                                          | <b>Probably yes</b><br>Randomised, double-blind                                                      | <b>Probably yes</b><br>Double-blind (details not reported)        | <b>Definitely yes</b> | <b>Definitely yes</b><br>There were 2.0% (12/588) and 4.3% (25/584) patients in incretin and control groups with missing outcome data, respectively; missing outcome data were generally balanced across treatment groups, with similar reasons for missing data across groups | <b>Definitely yes</b> | <b>Probably yes</b><br>Generally balanced baseline characteristics across groups |

|                                    |                                                                                          |                                                                                      |                                                                   |                       |                                                                                                                                                                                                                                                                              |                       |                                                                                  |
|------------------------------------|------------------------------------------------------------------------------------------|--------------------------------------------------------------------------------------|-------------------------------------------------------------------|-----------------------|------------------------------------------------------------------------------------------------------------------------------------------------------------------------------------------------------------------------------------------------------------------------------|-----------------------|----------------------------------------------------------------------------------|
| Seino (2010) <sup>(242,244)</sup>  | <b>Probably yes</b><br>Randomised, double-blind                                          | <b>Probably yes</b><br>Randomised, double-blind                                      | <b>Probably yes</b><br>Double-blind (details not reported)        | <b>Definitely yes</b> | <b>Probably yes</b><br>There were 9.4% (26/272) and 9.6% (19/139) patients in incretin and control groups with missing outcome data, respectively; missing outcome data were generally balanced across treatment groups, with similar reasons for missing data across groups | <b>Definitely yes</b> | <b>Probably yes</b><br>Generally balanced baseline characteristics across groups |
| Seino (2011) <sup>(245,246)</sup>  | <b>Definitely yes</b><br>Using computer generated codes which were kept in a secure area | <b>Probably no</b><br>Randomised, open label                                         | <b>Probably yes</b><br>Double-blind (details not reported)        | <b>Definitely yes</b> | <b>Definitely no</b><br>There were 31.8% (107/337) with missing outcome data                                                                                                                                                                                                 | <b>Definitely yes</b> | <b>Probably yes</b><br>Generally balanced baseline characteristics across groups |
| Seino (2012a) <sup>(247,248)</sup> | <b>Definitely yes</b><br>Using an interactive voice or web-activated response system     | <b>Definitely yes</b><br>Using an interactive voice or web-activated response system | <b>Definitely no</b><br>Open label                                | <b>Definitely yes</b> | <b>Definitely no</b><br>There were 21.2% (25/118) and 15.3% (20/131) patients in incretin and control groups with missing outcome data, respectively                                                                                                                         | <b>Definitely yes</b> | <b>Probably yes</b><br>Generally balanced baseline characteristics across groups |
| Seino (2012b) <sup>(249)</sup>     | <b>Definitely yes</b><br>Using an interactive voice response system                      | <b>Definitely yes</b><br>Using an interactive voice response system                  | <b>Definitely yes</b><br>Double-blind (participant, investigator) | <b>Definitely yes</b> | <b>Probably no</b><br>There were 13.6% (21/154) and 8.3% (13/157) patients in incretin and control groups with missing outcome data                                                                                                                                          | <b>Definitely yes</b> | <b>Probably yes</b><br>Generally balanced baseline characteristics across groups |
| Seino (2014) <sup>(250,251)</sup>  | <b>Probably yes</b><br>Randomised, double-blind                                          | <b>Probably yes</b><br>Randomised, double-blind                                      | <b>Probably yes</b><br>Double-blind (details not reported)        | <b>Definitely yes</b> | <b>Probably yes</b><br>There were 8.1% (13/161) and 7.4% (4/54) patients in incretin and control groups with missing outcome data, respectively; missing outcome data were generally balanced across treatment groups, with similar reasons for missing data across groups   | <b>Definitely yes</b> | <b>Probably yes</b><br>Generally balanced baseline characteristics across groups |
| Seino (2016) <sup>(252)</sup>      | <b>Definitely yes</b><br>Using an interactive voice-/web-responsive service              | <b>Definitely yes</b><br>Using an interactive voice-/web-responsive service          | <b>Definitely yes</b><br>Double-blind (participant, investigator) | <b>Definitely yes</b> | <b>Definitely yes</b><br>There were 4.7% (6/127) and 3.8% (5/130) patients in incretin and control groups with missing outcome data, respectively; missing outcome data were generally balanced across treatment groups, with similar reasons for missing data across groups | <b>Definitely yes</b> | <b>Probably yes</b><br>Generally balanced baseline characteristics across groups |
| Sheu (2015) <sup>(253)</sup>       | <b>Probably yes</b><br>Randomised, double-blind                                          | <b>Probably yes</b><br>Randomised, double-blind                                      | <b>Probably yes</b><br>Double-blind (details not reported)        | <b>Definitely yes</b> | <b>Definitely no</b><br>There were 47.4% (54/114) and 39.3% (257/571) patients in incretin and control groups with missing outcome data, respectively                                                                                                                        | <b>Definitely yes</b> | <b>Probably yes</b><br>Generally balanced baseline characteristics across groups |
| Strain (2013) <sup>(254)</sup>     | <b>Definitely yes</b><br>Using a validated automated system                              | <b>Definitely yes</b><br>Using an interactive response technology provider           | <b>Definitely yes</b><br>Double-blind (participant, investigator) | <b>Definitely yes</b> | <b>Probably yes</b><br>There were 5.8% (8/139) and 5.8% (8/139) patients in incretin and control groups with missing outcome data, respectively; missing outcome data were generally balanced across treatment groups, with similar reasons for missing data across groups   | <b>Definitely yes</b> | <b>Probably yes</b><br>Generally balanced baseline characteristics across groups |

|                                      |                                                                          |                                                                     |                                                                   |                       |                                                                                                                                                                                                                                                                               |                       |                                                                                  |
|--------------------------------------|--------------------------------------------------------------------------|---------------------------------------------------------------------|-------------------------------------------------------------------|-----------------------|-------------------------------------------------------------------------------------------------------------------------------------------------------------------------------------------------------------------------------------------------------------------------------|-----------------------|----------------------------------------------------------------------------------|
| Tajima (2011) <sup>(255)</sup>       | <b>Definitely yes</b><br>Using a computer-generated randomisation scheme | <b>Probably yes</b><br>Randomised, double-blind                     | <b>Probably yes</b><br>Double-blind (details not reported)        | <b>Definitely yes</b> | <b>Definitely no</b><br>There were 13.3% (8/60) and 18.8% (13/69) patients in incretin and control groups with missing outcome data, respectively                                                                                                                             | <b>Definitely yes</b> | <b>Probably yes</b><br>Generally balanced baseline characteristics across groups |
| Terauchi (2014) <sup>(256)</sup>     | <b>Probably yes</b><br>Randomised, double-blind                          | <b>Probably yes</b><br>Randomised, double-blind                     | <b>Probably yes</b><br>Double-blind (details not reported)        | <b>Definitely yes</b> | <b>Definitely yes</b><br>There were 4.8% (7/145) with missing outcome data                                                                                                                                                                                                    | <b>Definitely yes</b> | <b>Probably yes</b><br>Generally balanced baseline characteristics across groups |
| Thrasher (2014) <sup>(257,258)</sup> | <b>Definitely yes</b><br>Using a validated pseudorandom number           | <b>Probably yes</b><br>Randomised, double-blind                     | <b>Probably yes</b><br>Double-blind (details not reported)        | <b>Definitely yes</b> | <b>Probably yes</b><br>There were 8.3% (10/120) and 7.5% (8/106) patients in incretin and control groups with missing outcome data, respectively; missing outcome data were generally balanced across treatment groups, with similar reasons for missing data across groups   | <b>Definitely yes</b> | <b>Probably yes</b><br>Generally balanced baseline characteristics across groups |
| Umpierrez (2011) <sup>(259)</sup>    | <b>Definitely yes</b><br>Using a computer-generated random sequence      | <b>Probably yes</b><br>Randomised, double-blind                     | <b>Probably yes</b><br>Double-blind (details not reported)        | <b>Definitely yes</b> | <b>Probably no</b><br>There were 12.2% (24/196) and 9.0% (6/66) patients in incretin and control groups with missing outcome data, respectively                                                                                                                               | <b>Definitely yes</b> | <b>Probably yes</b><br>Generally balanced baseline characteristics across groups |
| Umpierrez (2014) <sup>(260)</sup>    | <b>Definitely yes</b><br>Using a computer generated random sequence      | <b>Definitely yes</b><br>Using an interactive Voice Response System | <b>Definitely yes</b><br>Double-blind (participant, investigator) | <b>Definitely yes</b> | <b>Definitely no</b><br>There were 7.8% (37/475) and 20.5% (55/268) patients in incretin and control groups with missing outcome data, respectively; missing outcome data were not balanced across treatment groups                                                           | <b>Definitely yes</b> | <b>Probably yes</b><br>Generally balanced baseline characteristics across groups |
| Vilsboll (2010) <sup>(261)</sup>     | <b>Definitely yes</b><br>Using a computer-generated allocation schedule  | <b>Probably yes</b><br>Randomised, double-blind                     | <b>Probably yes</b><br>Double-blind (details not reported)        | <b>Definitely yes</b> | <b>Probably no</b><br>There were 12.7% (41/322) and 11.3% (36/319) patients in incretin and control groups with missing outcome data, respectively                                                                                                                            | <b>Definitely yes</b> | <b>Probably yes</b><br>Generally balanced baseline characteristics across groups |
| Wang (2016) <sup>(262)</sup>         | <b>Definitely yes</b><br>Using an interactive voice-response system      | <b>Definitely yes</b><br>Using an interactive voice-response system | <b>Definitely yes</b><br>Double-blind (participant, investigator) | <b>Definitely yes</b> | <b>Probably yes</b><br>There were 7.0% (14/205) and 12.0% (13/101) patients in incretin and control groups with missing outcome data, respectively; missing outcome data were generally balanced across treatment groups, with similar reasons for missing data across groups | <b>Definitely yes</b> | <b>Probably yes</b><br>Generally balanced baseline characteristics across groups |
| Weissman (2014) <sup>(263,264)</sup> | <b>Definitely yes</b><br>Using an interactive voice-response system      | <b>Definitely yes</b><br>Using an interactive voice-response system | <b>Definitely yes</b><br>Double-blind (participant, investigator) | <b>Definitely yes</b> | <b>Probably yes</b><br>There were 10.8% (8/74) and 9.3% (8/86) patients in incretin and control groups with missing outcome data, respectively; missing outcome data were generally balanced across treatment groups, with similar reasons for missing data across groups     | <b>Definitely yes</b> | <b>Probably yes</b><br>Generally balanced baseline characteristics across groups |

|                                             |                                                                     |                                                                     |                                                                   |                       |                                                                                                                                                                                                                                                                                |                       |                                                                                  |
|---------------------------------------------|---------------------------------------------------------------------|---------------------------------------------------------------------|-------------------------------------------------------------------|-----------------------|--------------------------------------------------------------------------------------------------------------------------------------------------------------------------------------------------------------------------------------------------------------------------------|-----------------------|----------------------------------------------------------------------------------|
| White (2014) <sup>(265,266)</sup>           | <b>Definitely yes</b><br>Using an interactive voice-response system | <b>Definitely yes</b><br>Using an interactive voice-response system | <b>Definitely yes</b><br>Double-blind (participant, investigator) | <b>Definitely yes</b> | <b>Definitely no</b><br>There were 22.6% (666/2679) and 20.9% (564/2701) patients in incretin and control groups with missing outcome data, respectively                                                                                                                       | <b>Definitely yes</b> | <b>Probably yes</b><br>Generally balanced baseline characteristics across groups |
| Williams-Herman (2010) <sup>(267-270)</sup> | <b>Probably yes</b><br>Randomised, double-blind                     | <b>Probably yes</b><br>Randomised, double-blind                     | <b>Probably yes</b><br>Double-blind (details not reported)        | <b>Definitely yes</b> | <b>Definitely no</b><br>There were 26.6% (242/915) and 11.9% (21/176) patients in incretin and control groups with missing outcome data, respectively                                                                                                                          | <b>Definitely yes</b> | <b>Probably yes</b><br>Generally balanced baseline characteristics across groups |
| Wysham (2014) <sup>(271,272)</sup>          | <b>Probably yes</b><br>Randomised, double-blind                     | <b>Probably yes</b><br>Randomised, double-blind                     | <b>Probably yes</b><br>Double-blind (details not reported)        | <b>Definitely yes</b> | <b>Probably no</b><br>There were 12.0% (100/835) and 14.2% (20/141) patients in incretin and control groups with missing outcome data, respectively                                                                                                                            | <b>Definitely yes</b> | <b>Probably yes</b><br>Generally balanced baseline characteristics across groups |
| Yang (2012) <sup>(273)</sup>                | <b>Definitely yes</b><br>Using a computer-generated schedule        | <b>Probably yes</b><br>Randomised, double-blind                     | <b>Probably yes</b><br>Double-blind (details not reported)        | <b>Definitely yes</b> | <b>Probably yes</b><br>There were 11.7% (23/197) and 8.0% (16/198) patients in incretin and control groups with missing outcome data, respectively; missing outcome data were generally balanced across treatment groups, with similar reasons for missing data across groups  | <b>Definitely yes</b> | <b>Probably yes</b><br>Generally balanced baseline characteristics across groups |
| Yang (2015) <sup>(274)</sup>                | <b>Probably yes</b><br>Randomised, double-blind                     | <b>Probably yes</b><br>Randomised, double-blind                     | <b>Probably yes</b><br>Double-blind (details not reported)        | <b>Definitely yes</b> | <b>Probably yes</b><br>There were 6.3% (9/143) and 7.4% (10/136) patients in incretin and control groups with missing outcome data, respectively; missing outcome data were generally balanced across treatment groups, with similar reasons for missing data across groups    | <b>Definitely yes</b> | <b>Probably yes</b><br>Generally balanced baseline characteristics across groups |
| Yki-Jarvinen (2013) <sup>(275,276)</sup>    | <b>Definitely yes</b><br>Using a computer-generated random sequence | <b>Definitely yes</b><br>Using an interactive Voice Response System | <b>Definitely yes</b><br>Double-blind (participant, investigator) | <b>Definitely yes</b> | <b>Definitely yes</b><br>There were 2.1% (13/630) and 2.1% (13/631) patients in incretin and control groups with missing outcome data, respectively; missing outcome data were generally balanced across treatment groups, with similar reasons for missing data across groups | <b>Definitely yes</b> | <b>Probably yes</b><br>Generally balanced baseline characteristics across groups |
| Yokoh (2015) <sup>(277)</sup>               | <b>Probably yes</b><br>Randomised, double-blind                     | <b>Probably no</b><br>Randomised, open label                        | <b>Definitely no</b><br>Open label                                | <b>Definitely yes</b> | <b>Probably no</b><br>There were 11.7% (7/60) and 11.7% (7/59) patients in incretin and control groups with missing outcome data, respectively                                                                                                                                 | <b>Definitely yes</b> | <b>Probably yes</b><br>Generally balanced baseline characteristics across groups |
| Yu Pan (2014) <sup>(278)</sup>              | <b>Probably yes</b><br>Randomised, double-blind                     | <b>Probably yes</b><br>Randomised, double-blind                     | <b>Probably yes</b><br>Double-blind (details not reported)        | <b>Definitely yes</b> | <b>Probably yes</b><br>There were 8.4% (17/196) and 5.6% (11/195) patients in incretin and control groups with missing outcome data, respectively; missing outcome data were generally balanced across treatment groups, with similar reasons for missing data across groups   | <b>Definitely yes</b> | <b>Probably yes</b><br>Generally balanced baseline characteristics across groups |

|                                                 |                                                                                     |                                                                                     |                                                                   |                       |                                                                                                                                                                                                                                                                                    |                       |                                                                                  |
|-------------------------------------------------|-------------------------------------------------------------------------------------|-------------------------------------------------------------------------------------|-------------------------------------------------------------------|-----------------------|------------------------------------------------------------------------------------------------------------------------------------------------------------------------------------------------------------------------------------------------------------------------------------|-----------------------|----------------------------------------------------------------------------------|
| Zinman (2009) <sup>(279)</sup>                  | <b>Definitely yes</b><br>Using a telephone- or Web-based randomisation system       | <b>Probably yes</b><br>Randomised, double-blind                                     | <b>Definitely yes</b><br>Double-blind (participant, investigator) | <b>Definitely yes</b> | <b>Definitely no</b><br>There were 19.7% (70/356) and 29.2% (50/171) patients in incretin and control groups with missing outcome data, respectively                                                                                                                               | <b>Definitely yes</b> | <b>Probably yes</b><br>Generally balanced baseline characteristics across groups |
| <b>Large cardiovascular outcomes trials</b>     |                                                                                     |                                                                                     |                                                                   |                       |                                                                                                                                                                                                                                                                                    |                       |                                                                                  |
| Green (2015) (TECOS) <sup>(280)</sup>           | <b>Definitely yes</b><br>Using an interactive voice-response system                 | <b>Definitely yes</b><br>Using an interactive voice-response system                 | <b>Definitely yes</b><br>Double-blind (participant, investigator) | <b>Definitely yes</b> | <b>Probably yes</b><br>There were 4.9% (360/7332) and 5.9% (434/7339) patients in incretin and control groups with missing outcome data, respectively; missing outcome data were generally balanced across treatment groups, with similar reasons for missing data across groups   | <b>Definitely yes</b> | <b>Probably yes</b><br>Generally balanced baseline characteristics across groups |
| Marso (2016) (LEADER) <sup>(281)</sup>          | <b>Definitely yes</b><br>Using the interactive voice/web response system            | <b>Definitely yes</b><br>Using the interactive voice/web response system            | <b>Probably yes</b><br>Double-blind (details not reported)        | <b>Definitely yes</b> | <b>Definitely yes</b><br>There were 1.5% (25/1648) and 2.4% (40/1649) patients in incretin and control groups with missing outcome data, respectively; missing outcome data were generally balanced across treatment groups, with similar reasons for missing data across groups   | <b>Definitely yes</b> | <b>Probably yes</b><br>Generally balanced baseline characteristics across groups |
| Marso (2016) (SUSTAIN-6) <sup>(282)</sup>       | <b>Probably yes</b><br>Randomised, double-blind                                     | <b>Probably yes</b><br>Randomised, double-blind                                     | <b>Probably yes</b><br>Double-blind (details not reported)        | <b>Definitely yes</b> | <b>Definitely yes</b><br>There were 3.0% (139/4668) and 3.4% (159/4672) patients in incretin and control groups with missing outcome data, respectively; missing outcome data were generally balanced across treatment groups, with similar reasons for missing data across groups | <b>Definitely yes</b> | <b>Probably yes</b><br>Generally balanced baseline characteristics across groups |
| Pfeffer (2015) (ELIXA) <sup>(283)</sup>         | <b>Definitely yes</b><br>Using a centralized assignment system                      | <b>Definitely yes</b><br>Using a centralized assignment system                      | <b>Definitely yes</b><br>Double-blind (participant, investigator) | <b>Definitely yes</b> | <b>Probably yes</b><br>There were 5.7% (204/3034) and 7.8% (231/3034) patients in incretin and control groups with missing outcome data, respectively; missing outcome data were generally balanced across treatment groups, with similar reasons for missing data across groups   | <b>Definitely yes</b> | <b>Probably yes</b><br>Generally balanced baseline characteristics across groups |
| Scirica (2013) (SAVOR-TIMI 53) <sup>(284)</sup> | <b>Definitely yes</b><br>Using a central computerized telephone or Web-based system | <b>Definitely yes</b><br>Using a central computerized telephone or Web-based system | <b>Definitely yes</b><br>Double-blind (participant, investigator) | <b>Definitely yes</b> | <b>Definitely yes</b><br>There were 2.4% (202/8280) and 2.6% (214/8212) patients in incretin and control groups with missing outcome data, respectively; missing outcome data were generally balanced across treatment groups, with similar reasons for missing data across groups | <b>Definitely yes</b> | <b>Probably yes</b><br>Generally balanced baseline characteristics across groups |
| White (2013) (EXAMINE) <sup>(285)</sup>         | <b>Probably yes</b><br>Randomised, double-blind                                     | <b>Probably yes</b><br>Randomised, double-blind                                     | <b>Definitely yes</b><br>Double-blind (participant, investigator) | <b>Definitely yes</b> | <b>Definitely no</b><br>There were 22.6% (606/2679) and 21.9% (564/2701) patients in incretin and control groups with missing outcome data, respectively                                                                                                                           | <b>Definitely yes</b> | <b>Probably yes</b><br>Generally balanced baseline characteristics across groups |

\* Method for allocation concealment not clearly reported. We judged that concealed allocation was likely achieved given it was a randomised double blinded trial, according to instructions. We followed this rule throughout the review.

\*\* Method for generating randomisation sequence not clearly reported. We judged that randomisation sequence generation was likely not achieved given it was a randomised open label trial, according to instructions. We followed this rule throughout the



review.

† Method for allocation concealment not clearly reported. We judged that concealed allocation was likely achieved given it was a randomised double blinded trial, according to instructions. We followed this rule throughout the review.

†† Method for allocation concealment not clearly reported. We judged that concealed allocation was likely not achieved given it was a randomised open label trial, according to instructions. We followed this rule throughout the review.

‡ As death is definitely an objective outcome, the risk of bias is unlikely introduced even without blinding of outcome assessors. This principle applies to all the included trials.

# We used the following rules to judge the free of infrequent missing outcome data for all included trials throughout the review: definitely yes: there were less than 5% patients with missing outcome data, and missing outcome data were generally balanced across treatment groups, with similar reasons for missing data across groups; probably yes: there were 5 to 10% patients with missing outcome data, and missing outcome data were generally balanced across treatment groups, with similar reasons for missing data across groups; probably no: there were 10% to 15% of missing outcome data; definitely no: there were over 15% patients with missing outcome data, or there were more than 5% absolute difference of missing outcome data between groups.

§ Death data was clearly reported. This applied to all the included trials.

### References of included trials

1. Ahren B, Dimas AL, Miossec P, Saubadu S, Aronson R. Efficacy and safety of lixisenatide once-daily morning or evening injections in type 2 diabetes inadequately controlled on metformin (GetGoal-M). *Diabetes Care* 2013; **36**: 2543-2550.
2. GlaxoSmithKline. Efficacy and safety of albiglutide in treatment of type 2 diabetes. National Library of Medicine (US), 2000. <http://clinicaltrials.gov/show/NCT00838903> (accessed March 10, 2017).
3. Ahren B, Johnson SL, Stewart M, et al. HARMONY 3: 104-week randomized, double-blind, placebo- and active-controlled trial assessing the efficacy and safety of albiglutide compared with placebo, sitagliptin, and glimepiride in patients with type 2 diabetes taking metformin. *Diabetes Care* 2014; **37**: 2141-2148.
4. Amin NB, Wang X, Jain SM, Lee DS, Nucci G, Rusnak JM. Dose-ranging efficacy and safety study of ertugliflozin, a sodium-glucose co-transporter 2 inhibitor, in patients with type 2 diabetes on a background of metformin. *Diabetes Obes Metab* 2015; **17**: 591-598.
5. Araki E, Inagaki N, Tanizawa Y, Oura T, Takeuchi M, Imaoka T. Efficacy and safety of once-weekly dulaglutide in combination with sulphonylurea and/or biguanide compared with once-daily insulin glargine in Japanese patients with type 2 diabetes: a randomized, open-label, phase III, non-inferiority study. *Diabetes, Obesity & Metabolism* 2015; **17**: 994-1002.
6. Merck. A study to test the safety and efficacy of sitagliptin compared to glimepiride in patients with type 2 diabetes on a stable dose of metformin (0431-803)(COMPLETED). National Library of Medicine (US), 2000. <http://clinicaltrials.gov/show/NCT00701090> (accessed March 10, 2017).
7. Arechavaleta R, Seck T, Chen Y, et al. Efficacy and safety of treatment with sitagliptin or glimepiride in patients with type 2 diabetes inadequately controlled on metformin monotherapy: a randomized, double-blind, non-inferiority trial. *Diabetes, Obesity & Metabolism* 2011; **13**: 160-168.
8. Arjona Ferreira JC, Corry D, Mogensen CE, et al. Efficacy and Safety of Sitagliptin in Patients With Type 2 Diabetes and ESRD Receiving Dialysis: A 54-Week Randomized Trial. *Am J Kidney Dis* 2013; **61**: 579-587.
9. Arjona Ferreira JC, Marre M, Barzilai N, et al. Efficacy and safety of sitagliptin versus glipizide in patients with type 2 diabetes and moderate-to-severe chronic renal insufficiency. *Diabetes Care* 2013; **36**: 1067-1073.
10. Merck. Sitagliptin versus glipizide in participants with type 2 diabetes mellitus and chronic renal insufficiency (MK-0431-063 AM1). National Library of Medicine (US), 2000. <http://clinicaltrials.gov/show/NCT00509262> (accessed March 10, 2017).
11. Aroda VR, Rosenstock J, Wysham C, et al. Efficacy and Safety of LixiLan, a Titratable Fixed-Ratio Combination of Insulin Glargine Plus Lixisenatide in Type 2 Diabetes Inadequately Controlled on Basal Insulin and Metformin: The LixiLan-L Randomized Trial. *Diabetes Care* 2016; **39**: 1972-1980.
12. Aschner P, Katzeff HL, Guo H, et al. Efficacy and safety of monotherapy of sitagliptin compared with metformin in patients with type 2 diabetes. *Diabetes, Obesity and Metabolism* 2010; **12**: 252-261.
13. Merck. Sitagliptin comparative study in patients with type 2 diabetes. National Library of Medicine (US), 2000. <http://clinicaltrials.gov/show/NCT00449930> (accessed March 10, 2017).
14. Ba J, Han P, Yuan G, et al. Randomized trial assessing the safety and efficacy of sitagliptin in Chinese patients with type 2 diabetes mellitus inadequately controlled on sulphonylurea alone or

combined with metformin. *J Diabetes* 2016; doi: 10.1111/1753-0407.12456

15. Bajaj M, Gilman R, Patel S, Kempthorne-Rawson J, Lewis-D'Agostino D, Woerle HJ. Linagliptin improved glycaemic control without weight gain or hypoglycaemia in patients with Type 2 diabetes inadequately controlled by a combination of metformin and pioglitazone: A 24-week randomized, double-blind study. 2014; **31**: 1505-1514.
16. Barnett AH, Patel S, Harper R, et al. Linagliptin monotherapy in type 2 diabetes patients for whom metformin is inappropriate: An 18-week randomized, double-blind, placebo-controlled phase iii trial with a 34-week active-controlled extension. *Diabetes, Obesity and Metabolism* 2012; **14**: 1145-1154.
17. Barnett AH, Huisman H, Jones R, von Eynatten M, Patel S, Woerle HJ. Linagliptin for patients aged 70 years or older with type 2 diabetes inadequately controlled with common antidiabetes treatments: a randomised, double-blind, placebo-controlled trial. *Lancet* 2013; **382**: 1413-1423.
18. Boehringer Ingelheim Pharmaceuticals; Eli Lilly and Company. Efficacy and safety of linagliptin in elderly patients with type 2 diabetes. National Library of Medicine (US), 2000. <http://clinicaltrials.gov/show/NCT01084005> (accessed March 10, 2017).
19. Barnett AH, Charbonnel B, Li J, Donovan M, Fleming D, Iqbal N. Saxagliptin add-on therapy to insulin with or without metformin for type 2 diabetes mellitus: 52-week safety and efficacy. *Clinical Drug Investigation* 2013; **33**: 707-717.
20. Barnett AH, Charbonnel B, Donovan M, Fleming D, Chen R. Effect of saxagliptin as add-on therapy in patients with poorly controlled type 2 diabetes on insulin alone or insulin combined with metformin. *Current Medical Research and Opinion* 2012; **28**: 513-523.
21. Bristol-Myers Squibb; AstraZeneca. Safety and efficacy of saxagliptin plus insulin with or without metformin. National Library of Medicine (US), 2000. <http://clinicaltrials.gov/show/NCT00757588> (accessed March 10, 2017).
22. Bergenstal R, Lewin A, Bailey T, Chang D, Gylvin T, Roberts V. Efficacy and safety of biphasic insulin aspart 70/30 versus exenatide in subjects with type 2 diabetes failing to achieve glycemic control with metformin and a sulfonylurea. *Curr Med Res Opin* 2009; **25**: 65-75.
23. Bergenstal RM, Forti A, Chiasson JL, Woloschak M, Boldrin M, Balena R. Efficacy and safety of taspoglutide versus sitagliptin for type 2 diabetes mellitus (T-Emerge 4 Trial). *Diabetes Ther* 2012; **3**: 13-19.
24. Blonde L, Jendle J, Gross J, et al. Once-weekly dulaglutide versus bedtime insulin glargine, both in combination with prandial insulin lispro, in patients with type 2 diabetes (AWARD-4): a randomised, open-label, phase 3, non-inferiority study. *Lancet* 2015; **385**: 2057-2066.
25. Bolli GB, Munteanu M, Dotsenko S, et al. Efficacy and safety of lixisenatide once daily vs. placebo in people with Type 2 diabetes insufficiently controlled on metformin (GetGoal-F1). *Diabet Med* 2014; **31**: 176-184.
26. Bosi E, Camisasca RP, Collober C, Rochotte E, Garber AJ. Effects of vildagliptin on glucose control over 24 weeks in patients with type 2 diabetes inadequately controlled with metformin. *Diabetes Care* 2007; **30**: 890-895.
27. Bosi E, Dotta F, Jia Y, Goodman M. Vildagliptin plus metformin combination therapy provides superior glycaemic control to individual monotherapy in treatment-naive patients with type 2 diabetes mellitus. *Diabetes Obes Metab* 2009; **11**: 506-515.
28. Buse JB, Bergenstal RM, Glass LC, et al. Use of twice-daily exenatide in basal insulin-treated patients with type 2 diabetes. *Ann Intern Med* 2011; **154**: 103-112.

29. Bristol-Myers Squibb; Eli Lilly and Company. Addition of exenatide to insulin glargine in type 2 diabetes mellitus. National Library of Medicine (US), 2000. <http://clinicaltrials.gov/show/NCT00765817> (accessed March 10, 2017).
30. Chacra AR, Tan GH, Ravichandran S, List J, Chen R. Safety and efficacy of saxagliptin in combination with submaximal sulphonylurea versus up-titrated sulphonylurea over 76 weeks. *Diab Vasc Dis Res* 2011; **8**: 150-159.
31. Chacra AR, Tan GH, Apanovitch A, Ravichandran S, List J, Chen R. Saxagliptin added to a submaximal dose of sulphonylurea improves glycaemic control compared with uptitration of sulphonylurea in patients with type 2 diabetes: A randomised controlled trial. *Int J Clin Pract* 2009; **63**: 1395-1406.
32. Bristol-Myers Squibb. A study of saxagliptin in subjects with type 2 diabetes who have inadequate blood sugar control with sulfonylureas. National Library of Medicine (US), 2000. <http://clinicaltrials.gov/show/NCT00313313> (accessed March 10, 2017).
33. Davies M, Heller S, Sreenan S, et al. Once-Weekly Exenatide Versus Once- or Twice-Daily Insulin Detemir: Randomized, open-label, clinical trial of efficacy and safety in patients with type 2 diabetes treated with metformin alone or in combination with sulfonylureas. *Diabetes Care* 2013; **36**: 1368-1376.
34. Davies MJ, Bergenstal R, Bode B, et al. Efficacy of Liraglutide for Weight Loss Among Patients With Type 2 Diabetes: The SCALE Diabetes Randomized Clinical Trial. *JAMA* 2015; **314**: 687-699.
35. Novo Nordisk A/S. Effect of liraglutide on body weight in overweight or obese subjects with type 2 diabetes: SCALE™ -Diabetes. National Library of Medicine (US), 2000. <http://clinicaltrials.gov/show/NCT01272232> (accessed March 10, 2017).
36. Davies MJ, Bain SC, Atkin SL, et al. Efficacy and Safety of Liraglutide Versus Placebo as Add-on to Glucose-Lowering Therapy in Patients With Type 2 Diabetes and Moderate Renal Impairment (LIRA-RENAL): A Randomized Clinical Trial. *Diabetes Care* 2016; **39**: 222-230.
37. DeFronzo RA, Fleck PR, Wilson CA, Mekki Q. Efficacy and safety of the dipeptidyl peptidase-4 inhibitor alogliptin in patients with type 2 diabetes and inadequate glycemic control: A randomized, double-blind, placebo-controlled study. *Diabetes Care* 2008; **31**: 2315-2317.
38. Takeda. Efficacy and safety of alogliptin in subjects with type 2 diabetes. National Library of Medicine (US), 2000. <http://clinicaltrials.gov/show/NCT00286455> (accessed March 10, 2017).
39. DeFronzo RA, Hissa MN, Garber AJ, et al. The efficacy and safety of saxagliptin when added to metformin therapy in patients with inadequately controlled type 2 diabetes with metformin alone. *Diabetes Care* 2009; **32**: 1649-1655.
40. Bristol-Myers Squibb. Study assessing saxagliptin treatment in type 2 diabetic subjects who are not controlled with metformin alone. National Library of Medicine (US), 2000. <http://clinicaltrials.gov/show/NCT00121667> (accessed March 10, 2017).
41. De Fronzo RA, Burant CF, Fleck P, Wilson C, Mekki Q, Pratley RE. Efficacy and tolerability of the DPP-4 inhibitor alogliptin combined with pioglitazone, in metformin-treated patients with type 2 diabetes. *J Clin Endocrinol Metab* 2012; **97**: 1615-1622.
42. DeFronzo RA LA, Patel S, Liu D4, Kaste R, Woerle HJ, Broedl UC. Combination of empagliflozin and linagliptin as second-line therapy in subjects with type 2 diabetes inadequately controlled on metformin. *Diabetes Care* 2015; **38**: 384-393.
43. Boehringer Ingelheim; Eli Lilly and Company. Efficacy and safety of empagliflozin (BI 10773) / linagliptin (BI 1356) fixed dose combination in treatment naïve and metformin treated type 2 diabetes

patients. National Library of Medicine (US), 2000. <http://clinicaltrials.gov/show/NCT01422876> (accessed March 10, 2017).

44. Del Prato S, Camisasca R, Wilson C, Fleck P. Durability of the efficacy and safety of alogliptin compared with glipizide in type 2 diabetes mellitus: a 2-year study. *Diabetes Obes Metab* 2014; **16**: 1239-1246.

45. Takeda. Efficacy and safety of alogliptin plus metformin compared to glipizide plus metformin in patients with type 2 diabetes mellitus (ENDURE). National Library of Medicine (US), 2000. <http://clinicaltrials.gov/show/NCT00856284> (accessed March 10, 2017).

46. Diamant M, Van Gaal L, Guerci B, et al. Exenatide once weekly versus insulin glargine for type 2 diabetes (DURATION-3): 3-year results of an open-label randomised trial. *Lancet Diabetes Endocrinol* 2014; **2**: 464-473.

47. Diamant M, Van Gaal L, Stranks S, et al. Safety and efficacy of once-weekly exenatide compared with insulin glargine titrated to target in patients with type 2 diabetes over 84 weeks. *Diabetes Care* 2012; **35**: 683-689.

48. Diamant M, Van Gaal L, Stranks S, et al. Once weekly exenatide compared with insulin glargine titrated to target in patients with type 2 diabetes (DURATION-3): an open-label randomised trial. *Lancet* 2010; **375**: 2234-2243.

49. Amylin Pharmaceuticals, LLC; Eli Lilly and Company. Efficacy of exenatide once weekly and once-daily insulin glargine in patients with type 2 diabetes treated with metformin alone or in combination with sulfonylurea (DURATION - 3). National Library of Medicine (US), 2000. <http://clinicaltrials.gov/show/NCT00641056> (accessed March 10, 2017).

50. Diamant M, Nauck MA, Shaginian R, et al. Glucagon-like peptide 1 receptor agonist or bolus insulin with optimized basal insulin in type 2 diabetes. *Diabetes Care* 2014; **37**: 2763-2773.

51. AstraZeneca; Eli Lilly and Company. A trial comparing two therapies: basal insulin/glargine, exenatide and metformin therapy (BET) or basal insulin/glargine, bolus insulin lispro and metformin therapy (BBT) in subjects with type 2 diabetes. National Library of Medicine (US), 2000. <http://clinicaltrials.gov/show/NCT00960661> (accessed March 10, 2017).

52. Dobs AS, Goldstein BJ, Aschner P, et al. Efficacy and safety of sitagliptin added to ongoing metformin and rosiglitazone combination therapy in a randomized placebo-controlled 54-week trial in patients with type 2 diabetes. *J Diabetes* 2013; **5**: 68-79.

53. Dungan KM, Weitgasser R, Perez Manghi F, et al. A 24-week study to evaluate the efficacy and safety of once-weekly dulaglutide added on to glimepiride in type 2 diabetes (AWARD-8). *Diabetes Obes Metab* 2016; **18**: 475-482.

54. Eli Lilly and Company. Study of How Dulaglutide Compares to Placebo in Participants With Type 2 Diabetes Who Are Also on Sulfonylurea Therapy (AWARD-8) (AWARD-8). National Library of Medicine (US), 2000. <http://clinicaltrials.gov/show/NCT01769378> (accessed March 10, 2017).

55. Ferdinand KC, White WB, Calhoun DA, et al. Effects of the once-weekly glucagon-like peptide-1 receptor agonist dulaglutide on ambulatory blood pressure and heart rate in patients with type 2 diabetes mellitus. *Hypertension* 2014; **64**: 731-737.

56. Ferrannini E, Fonseca V, Zinman B, et al. Fifty-two-week efficacy and safety of vildagliptin vs. glimepiride in patients with type 2 diabetes mellitus inadequately controlled on metformin monotherapy. *Diabetes Obes Metab* 2009; **11**: 157-166.

57. Filozof C, Gautier JF. A comparison of efficacy and safety of vildagliptin and gliclazide in combination with metformin in patients with type 2 diabetes inadequately controlled with metformin

- alone: A 52-week, randomized study. *Diabet Med* 2010; **27**: 318-326.
58. Fonseca V, Schweizer A, Albrecht D, Baron MA, Chang I, Dejager S. Addition of vildagliptin to insulin improves glycaemic control in type 2 diabetes. *Diabetologia* 2007; **50**: 1148-1155.
59. Forst T, Koch C, Dworak M. Vildagliptin versus insulin in patients with type 2 diabetes mellitus inadequately controlled with sulfonylurea: Results from a randomized, 24 week study. *Curr Med Res Opin* 2015; **31**: 1079-1084.
60. Frederich R, McNeill R, Berglind N, Fleming D, Chen R. The efficacy and safety of the dipeptidyl peptidase-4 inhibitor saxagliptin in treatment-naive patients with type 2 diabetes mellitus: A randomized controlled trial. *Diabetol Metab Syndr* 2012; **4**: 36.
61. Bristol-Myers Squibb. Study of BMS-477118 as monotherapy with titration in subjects with type 2 diabetes who are not controlled with diet and exercise. National Library of Medicine (US), 2000. <http://clinicaltrials.gov/show/NCT00316082> (accessed March 10, 2017).
62. Frias Jp GCHEAADFOPJSA. Exenatide once weekly plus dapagliflozin once daily versus exenatide or dapagliflozin alone in patients with type 2 diabetes inadequately controlled with metformin monotherapy (DURATION-8): a 28 week, multicentre, double-blind, phase 3, randomised controlled trial. *The lancet diabetes and endocrinology* 2016.
63. Gallwitz B, Rosenstock J, Rauch T, et al. 2-year efficacy and safety of linagliptin compared with glimepiride in patients with type 2 diabetes inadequately controlled on metformin: a randomised, double-blind, non-inferiority trial. *Lancet* 2012; **380**: 475-483.
64. Boehringer Ingelheim Pharmaceuticals. Efficacy and safety of BI 1356 in combination with metformin in patients with type 2 diabetes. National Library of Medicine (US), 2000. <http://clinicaltrials.gov/show/NCT00622284> (accessed March 10, 2017).
65. Gallwitz B, Guzman J, Dotta F, et al. Exenatide twice daily versus glimepiride for prevention of glycaemic deterioration in patients with type 2 diabetes with metformin failure (EUREXA): An open-label, randomised controlled trial. *Lancet* 2012; **379**: 2270-2278.
66. Amylin Pharmaceuticals, LLC; Eli Lilly and Company. Exenatide versus glimepiride in patients with type 2 diabetes. National Library of Medicine (US), 2000. <http://clinicaltrials.gov/show/NCT00359762> (accessed March 10, 2017).
67. Gao Y, Yoon KH, Chuang LM, et al. Efficacy and safety of exenatide in patients of Asian descent with type 2 diabetes inadequately controlled with metformin or metformin and a sulphonylurea. *Diabetes Res Clin Pract* 2009; **83**: 69-76.
68. Lu CH, Wu TJ, Shih KC, et al. Safety and efficacy of twice-daily exenatide in Taiwanese patients with inadequately controlled type 2 diabetes mellitus. *J Formos Med Assoc* 2013; **112**: 144-150.
69. Garber AJ, Foley JE, Banerji MA, et al. Effects of vildagliptin on glucose control in patients with type 2 diabetes inadequately controlled with a sulphonylurea. *Diabetes Obes Metab* 2008; **10**: 1047-1056.
70. Garber A, Henry R, Ratner R, et al. Liraglutide versus glimepiride monotherapy for type 2 diabetes (LEAD-3 Mono): a randomised, 52-week, phase III, double-blind, parallel-treatment trial. *Lancet* 2009; **373**: 473-481.
71. Novo Nordisk A/S. To evaluate the effect of liraglutide versus glimepiride (Amaryl®) on haemoglobin A1c (LEAD-3). National Library of Medicine (US), 2000. <http://clinicaltrials.gov/show/NCT00294723> (accessed March 10, 2017).
72. Giorgino F, Benroubi M, Sun JH, Zimmermann AG, Pechtner V. Efficacy and safety of once-



weekly dulaglutide versus insulin glargine in patients with type 2 Diabetes on metformin and glimepiride (AWARD-2). *Diabetes care* 2015; **38**: 2241-2249.

73. Goke B, Gallwitz B, Eriksson JG, Hellqvist A, Gause-Nilsson I. Saxagliptin vs. glipizide as add-on therapy in patients with type 2 diabetes mellitus inadequately controlled on metformin alone: Long-term (52-week) extension of a 52-week randomised controlled trial. *Int J Clin Pract* 2013; **67**: 307-316.

74. Goke B, Gallwitz B, Eriksson J, Hellqvist A, Gause-Nilsson I. Saxagliptin is non-inferior to glipizide in patients with type 2 diabetes mellitus inadequately controlled on metformin alone: A 52-week randomised controlled trial. *Int J Clin Pract* 2010; **64**: 1619-1631.

75. AstraZeneca; Bristol-Myers Squibb. 52-week add-on to metformin comparison of saxagliptin and sulphonylurea, with a 52-week extension period. National Library of Medicine (US), 2000. <http://clinicaltrials.gov/show/NCT00575588> (accessed March 10, 2017).

76. Goodman M, Thurston H, Penman J. Efficacy and tolerability of vildagliptin in patients with type 2 diabetes inadequately controlled with metformin monotherapy. *Horm Metab Res* 2009; **41**: 368-373.

77. Gough SCL, Bode B, Woo V, et al. Efficacy and safety of a fixed-ratio combination of insulin degludec and liraglutide (IDegLira) compared with its components given alone: Results of a phase 3, open-label, randomised, 26-week, treat-to-target trial in insulin-naive patients with type 2 diabetes. *Lancet Diabetes Endocrinol* 2014; **2**: 885-893.

78. Grunberger G, Chang A, Garcia Soria G, Botros FT, Bsharat R, Milicevic Z. Monotherapy with the once-weekly GLP-1 analogue dulaglutide for 12weeks in patients with Type2 diabetes: Dose-dependent effects on glycaemic control in a randomized, double-blind, placebo-controlled study. *Diabet Med* 2012; **29**: 1260-1267.

79. Haak T, Meinicke T, Jones R, Weber S, Eynatten MV, Woerle HJ. Initial combination of linagliptin and metformin improves glycaemic control in type 2 diabetes: A randomized, double-blind, placebo-controlled study. *Diabetes Obes Metab* 2012; **14**: 565-574.

80. Boehringer Ingelheim Pharmaceuticals. Safety and efficacy of linagliptin (BI 1356) plus metformin in type 2 diabetes, factorial design. National Library of Medicine (US), 2000. <http://clinicaltrials.gov/show/NCT00798161> (accessed March 10, 2017).

81. Hartley P, Shentu Y, Betz-Schiff P, et al. Efficacy and Tolerability of Sitagliptin Compared with Glimepiride in Elderly Patients with Type 2 Diabetes Mellitus and Inadequate Glycemic Control: A Randomized, Double-Blind, Non-Inferiority Trial. *Drugs Aging* 2015; **32**: 469-476.

82. Henry RR, Smith SR, Schwartz SL, et al. Effects of saxagliptin on (beta)-cell stimulation and insulin secretion in patients with type 2 diabetes. *Diabetes Obes Metab* 2011; **13**: 850-858.

83. Henry RR, Mudaliar S, Kanitra L, Woloschak M, Balena R. Efficacy and safety of tasoglutide in patients with type 2 diabetes inadequately controlled with metformin plus pioglitazone over 24 weeks: T-emerge 3 trial. *J Clin Endocrinol Metab* 2012; **97**: 2370-2379.

84. Henry RR, Staels B, Fonseca VA, et al. Efficacy and safety of initial combination treatment with sitagliptin and pioglitazone-a factorial study. *Diabetes Obes Metab* 2014; **16**: 223-230.

85. Merck. MK0431 and pioglitazone co-administration factorial study in patients with type 2 diabetes mellitus (0431- 102 AM2). National Library of Medicine (US), 2000. <http://clinicaltrials.gov/show/NCT00722371> (accessed March 10, 2017).

86. Hermans MP, Delibasi T, Farmer I, et al. Effects of saxagliptin added to sub-maximal doses of metformin compared with uptitration of metformin in type 2 diabetes: The PROMPT study. *Curr Med*

*Res Opin* 2012; **28**: 1635-1645.

87. AstraZeneca; Bristol-Myers Squibb. Efficacy and tolerability of saxagliptin add-on compared to uptitration of metformin in patients with type 2 diabetes (PROMPT). National Library of Medicine (US), 2000. <http://clinicaltrials.gov/show/NCT01006590> (accessed March 10, 2017).

88. Hirose T, Suzuki M, Tsumiyama I. Efficacy and Safety of Vildagliptin as an Add-on to Insulin with or without Metformin in Japanese Patients with Type 2 Diabetes Mellitus: A 12-week, Double-Blind, Randomized Study. *Diabetes Ther* 2015; **6**: 559-571.

89. Novartis Pharmaceuticals. Study of Efficacy and Safety of Vildagliptin as add-on Insulin Therapy in T2DM Patients. National Library of Medicine (US), 2000. <http://clinicaltrials.gov/show/NCT02002221> (accessed March 10, 2017).

90. Hollander PL, Li J, Frederich R, Allen E, Chen R. Safety and efficacy of saxagliptin added to thiazolidinedione over 76 weeks in patients with type 2 diabetes mellitus. *Diab Vasc Dis Res* 2011; **8**: 125-135.

91. Hollander P, Li J, Allen E, Chen R. Saxagliptin added to a thiazolidinedione improves glycemic control in patients with type 2 diabetes and inadequate control on thiazolidinedione alone. *J Clin Endocrinol Metab* 2009; **94**: 4810-4819.

92. Bristol-Myers Squibb. A study assessing saxagliptin treatment in type 2 diabetic subjects who are not controlled with tzd therapy alone. National Library of Medicine (US), 2000. <http://clinicaltrials.gov/show/NCT00295633> (accessed March 10, 2017).

93. Hollander P, Lasko B, Barnett AH, et al. Effects of tasoglutide on glycemic control and body weight in obese patients with type 2 diabetes (T-emerge 7 study). *Obesity (Silver Spring)* 2013; **21**: 238-247.

94. Home PD, Shamanna P, Stewart M, et al. Efficacy and tolerability of albiglutide versus placebo or pioglitazone over 1 year in people with type 2 diabetes currently taking metformin and glimepiride: HARMONY 5. *Diabetes Obes Metab* 2015; **17**: 179-187.

95. Idorn T, Knop FK, Jorgensen MB, et al. Safety and efficacy of liraglutide in patients with type 2 diabetes and end-stage renal disease: An investigator-initiated, placebo-controlled, double-blind, parallel-group, randomized trial. *Diabetes care* 2015; **39**: 206-213.

96. Inagaki N, Atsumi Y, Oura T, Saito H, Imaoka T. Efficacy and Safety Profile of Exenatide Once Weekly Compared With Insulin Once Daily in Japanese Patients With Type 2 Diabetes Treated With Oral Antidiabetes Drug(s): Results From a 26-Week, Randomized, Open-Label, Parallel-Group, Multicenter, Noninferiority Study. *Clinical Therapeutics* 2012; **34**: 1892-1908.e1891.

97. Bristol-Myers Squibb; Eli Lilly and Company. Study to evaluate the efficacy and safety of exenatide once-weekly injection compared to once-daily insulin in type 2 diabetes mellitus. National Library of Medicine (US), 2000. <http://clinicaltrials.gov/show/NCT00935532> (accessed March 10, 2017).

98. Iwamoto Y, Kashiwagi A, Yamada N, et al. Efficacy and safety of vildagliptin and voglibose in Japanese patients with type 2 diabetes: A 12-week, randomized, double-blind, active-controlled study. *Diabetes Obes Metab* 2010; **12**: 700-708.

99. Kadowaki T, Namba M, Yamamura A, Sowa H, Wolka AM, Brodows RG. Exenatide exhibits dose-dependent effects on glycemic control over 12 weeks in Japanese patients with suboptimally controlled type 2 diabetes. *Endocr J* 2009; **56**: 415-424.

100. Kadowaki T, Namba M, Imaoka T, et al. Improved glycemic control and reduced bodyweight with exenatide: A double-blind, randomized, phase 3 study in Japanese patients with suboptimally



- controlled type 2 diabetes over 24 weeks. *J Diabetes Investig* 2011; **2**: 210-217.
101. Bristol-Myers Squibb; Eli Lilly and Company. Efficacy and safety of exenatide in Japanese patients with type 2 diabetes who are treated with oral antidiabetic(s). National Library of Medicine (US), 2000. <http://clinicaltrials.gov/show/NCT00577824> (accessed March 10, 2017).
102. Kadowaki T, Tajima N, Odawara M, et al. Efficacy and safety of sitagliptin add-on therapy in Japanese patients with type 2 diabetes on insulin monotherapy. *Diabetology International* 2013; **4**: 160-172.
103. Kadowaki T, Kondo K. Efficacy and safety of teneligliptin in combination with pioglitazone in Japanese patients with type 2 diabetes mellitus. *J Diabetes Investig* 2013; **4**: 576-584.
104. Mitsubishi Tanabe Pharma Corporation. Efficacy and safety study of mp-513 in combination with thiazolidinedione in patients with type 2 diabetes. National Library of Medicine (US), 2000. <http://clinicaltrials.gov/show/NCT01026194> (accessed March 10, 2017).
105. Kadowaki T, Kondo K. Efficacy, safety and dose-response relationship of teneligliptin, a dipeptidyl peptidase-4 inhibitor, in Japanese patients with type 2 diabetes mellitus. *Diabetes Obes Metab* 2013; **15**: 810-818.
106. Mitsubishi Tanabe Pharma Corporation. Efficacy and safety study of MP-513 in patients with type 2 diabetes. National Library of Medicine (US), 2000. <http://clinicaltrials.gov/show/NCT00628212> (accessed March 10, 2017).
107. Kadowaki T, Kondo K. Efficacy and safety of teneligliptin added to glimepiride in Japanese patients with type 2 diabetes mellitus: A randomized, double-blind, placebo-controlled study with an open-label, long-term extension. *Diabetes Obes Metab* 2014; **16**: 418-425.
108. Kaku K, Rasmussen MF, Clauson P, Seino Y. Improved glycaemic control with minimal hypoglycaemia and no weight change with the once-daily human glucagon-like peptide-1 analogue liraglutide as add-on to sulphonylurea in Japanese patients with type 2 diabetes. *Diabetes Obes Metab* 2010; **12**: 341-347.
109. Kaku K, Kiyosue A, Ono Y, et al. Liraglutide is effective and well tolerated in combination with an oral antidiabetic drug in Japanese patients with type 2 diabetes: A randomized, 52-week, open-label, parallel-group trial. *J Diabetes Investig* 2016; **7**: 76-84.
110. Kawamori R, Inagaki N, Araki E, et al. Linagliptin monotherapy provides superior glycaemic control versus placebo or voglibose with comparable safety in Japanese patients with type 2 diabetes: A randomized, placebo and active comparator-controlled, double-blind study. *Diabetes Obes Metab* 2012; **14**: 348-357.
111. Araki E, Kawamori R, Inagaki N, et al. Long-term safety of linagliptin monotherapy in Japanese patients with type 2 diabetes. *Diabetes, Obesity & Metabolism* 2013; **15**: 364-371.
112. Boehringer Ingelheim Pharmaceuticals. Japanese P III vs voglibose and placebo. National Library of Medicine (US), 2000. <http://clinicaltrials.gov/show/NCT00654381> (accessed March 10, 2017).
113. Kikuchi M, Abe N, Kato M, Terao S, Mimori N, Tachibana H. Vildagliptin dose-dependently improves glycemic control in Japanese patients with type 2 diabetes mellitus. *Diabetes Res Clin Pract* 2009; **83**: 233-240.
114. Kikuchi M, Haneda M, Koya D, et al. Efficacy and tolerability of vildagliptin as an add-on to glimepiride in Japanese patients with Type 2 diabetes mellitus. *Diabetes Res Clin Pract* 2010; **89**: 216-223.
115. Kim MK, Rhee EJ, Han KA, et al. Efficacy and safety of teneligliptin, a dipeptidyl peptidase-4

inhibitor, combined with metformin in Korean patients with type 2 diabetes mellitus: A 16-week, randomized, double-blind, placebo-controlled phase III trial. *Diabetes Obes Metab* 2015; **17**: 309-312.

116. Kim JH, Kim SS, Baek HS, et al. Comparison of vildagliptin and pioglitazone in Korean patients with type 2 diabetes inadequately controlled with metformin. *Diabetes Metab J* 2016; **40**: 230-239.

117. Kobayashi K, Yokoh H, Sato Y, et al. Efficacy and safety of the dipeptidyl peptidase-4 inhibitor sitagliptin compared with alpha-glucosidase inhibitor in Japanese patients with type 2 diabetes inadequately controlled on sulfonylurea alone (SUCCESS-2): A multicenter, randomized, open-label, non-inferiority trial. *Diabetes Obes Metab* 2014; **16**: 761-765.

118. Kothny W, Foley J, Kozlovski P, Shao Q, Gallwitz B, Lukashevich V. Improved glycaemic control with vildagliptin added to insulin, with or without metformin, in patients with type 2 diabetes mellitus. *Diabetes Obes Metab* 2013; **15**: 252-257.

119. Lavalley-Gonzalez FJ, Januszewicz A, Davidson J, et al. Efficacy and safety of canagliflozin compared with placebo and sitagliptin in patients with type 2 diabetes on background metformin monotherapy: a randomised trial. *Diabetologia* 2013; **56**: 2582-2592.

120. Janssen Research & Development, LLC. The CANTATA-D trial (canagliflozin treatment and trial analysis - DPP-4 inhibitor comparator trial). National Library of Medicine (US), 2000. <http://clinicaltrials.gov/show/NCT01106677> (accessed March 10, 2017).

121. Liutkus J, Rosas Guzman J, Norwood P, et al. A placebo-controlled trial of exenatide twice-daily added to thiazolidinediones alone or in combination with metformin. *Diabetes Obes Metab* 2010; **12**: 1058-1065.

122. Lukashevich V, Schweizer A, Shao Q, Groop PH, Kothny W. Safety and efficacy of vildagliptin versus placebo in patients with type 2 diabetes and moderate or severe renal impairment: A prospective 24-week randomized placebo-controlled trial. *Diabetes Obes Metab* 2011; **13**: 947-954.

123. Kothny W SQ, Groop PH, Lukashevich V. One-year safety, tolerability and efficacy of vildagliptin in patients with type 2 diabetes and moderate or severe renal impairment. *Diabetes Obes Metab* 2012; **14**: 1032-1039.

124. Lukashevich V, Prato SD, Araga M, Kothny W. Efficacy and safety of vildagliptin in patients with type 2 diabetes mellitus inadequately controlled with dual combination of metformin and sulphonylurea. *Diabetes Obes Metab* 2014; **16**: 403-409.

125. Macauley M, Hollingsworth KG, Smith FE, et al. Effect of vildagliptin on hepatic steatosis. *J Clin Endocrinol Metab* 2015; **100**: 1578-1585.

126. Marre M, Shaw J, Brandle M, et al. Liraglutide, a once-daily human GLP-1 analogue, added to a sulphonylurea over 26 weeks produces greater improvements in glycaemic and weight control compared with adding rosiglitazone or placebo in subjects with Type 2 diabetes (LEAD-1 SU). *Diabet Med* 2009; **26**: 268-278.

127. Mathieu C, Rodbard HW, Cariou B, et al. A comparison of adding liraglutide versus a single daily dose of insulin aspart to insulin degludec in subjects with type 2 diabetes (BEGIN: VICTOZA ADD-ON). *Diabetes Obes Metab* 2014; **16**: 636-644.

128. Mathieu C, Shankar RR, Lorber D, et al. A Randomized Clinical Trial to Evaluate the Efficacy and Safety of Co-Administration of Sitagliptin with Intensively Titrated Insulin Glargine. *Diabetes Ther* 2015; **6**: 127-142.

129. Merck Sharp & Dohme Corp. Study of sitagliptin for the treatment of type 2 diabetes mellitus with inadequate glycaemic control on insulin (MK- 0431-260). National Library of Medicine (US),

2000. <http://clinicaltrials.gov/show/NCT01462266> (accessed March 10, 2017).
130. Matthaehi S, Catrinoiu D, Celinski A, et al. Randomized, Double-Blind trial of triple therapy with saxagliptin add-on to dapagliflozin plus metformin in patients with type 2 Diabetes. *Diabetes care* 2015; **38**: 2018-2024.
131. AstraZeneca. Safety and Efficacy of Saxagliptin in Triple Therapy to Treat Subjects With Type 2 Diabetes. National Library of Medicine (US), 2000. <http://clinicaltrials.gov/show/NCT01619059> (accessed March 10, 2017).
132. Miyagawa J, Odawara M, Takamura T, Iwamoto N, Takita Y, Imaoka T. Once-weekly glucagon-like peptide-1 receptor agonist dulaglutide is non-inferior to once-daily liraglutide and superior to placebo in Japanese patients with type 2 diabetes: a 26-week randomized phase III study. *Diabetes Obes Metab* 2015; **17**: 974-983.
133. Moretto TJ, Milton DR, Ridge TD, et al. Efficacy and tolerability of exenatide monotherapy over 24 weeks in antidiabetic drug-naïve patients with type 2 diabetes: A randomized, double-blind, placebo-controlled, parallel-group study. *Clin Ther* 2008; **30**: 1448-1460.
134. Mori K, Emoto M, Shoji T, Inaba M. Linagliptin monotherapy compared with voglibose monotherapy in patients with type 2 diabetes undergoing hemodialysis: a 12-week randomized trial. *BMJ Open Diabetes Res Care* 2016; **4**: e000265.
135. Moses RG, Round E, Shentu Y, et al. A randomized clinical trial evaluating the safety and efficacy of sitagliptin added to the combination of sulfonylurea and metformin in patients with type 2 diabetes mellitus and inadequate glycemic control. *J Diabetes* 2016; **8**: 701-711.
136. Nauck MA, Duran S, Kim D, et al. A comparison of twice-daily exenatide and biphasic insulin aspart in patients with type 2 diabetes who were suboptimally controlled with sulfonylurea and metformin: a non-inferiority study. *Diabetologia* 2007; **50**: 259-267.
137. Bristol-Myers Squibb; Eli Lilly and Company. Exenatide compared with twice-daily biphasic insulin aspart in patients with type 2 diabetes using sulfonylurea and metformin. National Library of Medicine (US), 2000. <http://clinicaltrials.gov/show/NCT00082407> (accessed March 10, 2017).
138. Nauck MA, Ellis GC, Fleck PR, Wilson CA, Mekki Q. Efficacy and safety of adding the dipeptidyl peptidase-4 inhibitor alogliptin to metformin therapy in patients with type 2 diabetes inadequately controlled with metformin monotherapy: A multicentre, randomised, double-blind, placebo-controlled study. *Int J Clin Pract* 2009; **63**: 46-55.
139. Takeda. Efficacy and safety of alogliptin combined with metformin in participants with type 2 diabetes mellitus. National Library of Medicine (US), 2000. <http://clinicaltrials.gov/show/NCT00286442> (accessed March 10, 2017).
140. Nauck M, Frid A, Hermansen K, et al. Long-term efficacy and safety comparison of liraglutide, glimepiride and placebo, all in combination with metformin in type 2 diabetes: 2-year results from the LEAD-2 study. *Diabetes Obes Metab* 2013; **15**: 204-212.
141. Nauck M, Frid A, Hermansen K, et al. Efficacy and safety comparison of liraglutide, glimepiride, and placebo, all in combination with metformin, in type 2 diabetes. *Diabetes Care* 2009; **32**: 84-90.
142. Nauck M, Horton E, Andjelkovic M, et al. Taspoglutide, a once-weekly glucagon-like peptide-1 analogue, vs. insulin glargine titrated to target in patients with Type 2 diabetes: An open-label randomized trial. *Diabet Med* 2013; **30**: 109-113.
143. Nauck M, Weinstock RS, Umpierrez GE, Guerci B, Skrivanek Z, Milicevic Z. Efficacy and safety of dulaglutide versus sitagliptin after 52 weeks in type 2 diabetes in a randomized controlled trial (AWARD-5). *Diabetes Care* 2014; **37**: 2149-2158.

144. Skrivanek Z, Gaydos BL, Chien JY, et al. Dose-finding results in an adaptive, seamless, randomized trial of once-weekly dulaglutide combined with metformin in type 2 diabetes patients (AWARD-5). *Diabetes Obes Metab* 2014; **16**: 748-756.
145. Nauck MA, Stewart MW, Perkins C, et al. Efficacy and safety of once-weekly GLP-1 receptor agonist albiglutide (HARMONY 2): 52 week primary endpoint results from a randomised, placebo-controlled trial in patients with type 2 diabetes mellitus inadequately controlled with diet and exercise. *Diabetologia* 2016; **59**: 266-274.
146. Merck. Metformin add-on study in patients with type 2 diabetes mellitus (0431-020)(COMPLETED). National Library of Medicine (US), 2000. <http://clinicaltrials.gov/show/NCT00086515> (accessed March 10, 2017).
147. Charbonnel B, Karasik A, Liu J, Wu M, Meininger G. Efficacy and safety of the dipeptidyl peptidase-4 inhibitor sitagliptin added to ongoing metformin therapy in patients with type 2 diabetes inadequately controlled with metformin alone. *Diabetes Care* 2006; **29**: 2638-2643.
148. Merck. An investigational drug in patients with type 2 diabetes mellitus and chronic renal insufficiency. National Library of Medicine (US), 2000. <http://clinicaltrials.gov/show/NCT00095056> (accessed March 10, 2017).
149. Merck. Sulfonylurea add-on study in patients with type 2 diabetes mellitus (0431-035). National Library of Medicine (US), 2000. <http://clinicaltrials.gov/show/NCT00106704> (accessed March 10, 2017).
150. Hermansen K, Kipnes M, Luo E, Fanurik D, Khatami H, Stein P. Efficacy and safety of the dipeptidyl peptidase-4 inhibitor, sitagliptin, in patients with type 2 diabetes mellitus inadequately controlled on glimepiride alone or on glimepiride and metformin. *Diabetes Obes Metab* 2007; **9**: 733-745.
151. Merck. MK0431 monotherapy study in patients with type 2 diabetes mellitus. National Library of Medicine (US), 2000. <http://clinicaltrials.gov/show/NCT00289848> (accessed March 10, 2017).
152. Mohan V, Yang W, Son HY, et al. Efficacy and safety of sitagliptin in the treatment of patients with type 2 diabetes in China, India, and Korea. *Diabetes Res Clin Pract* 2009; **83**: 106-116.
153. Merck. Study of sitagliptin in older type 2 diabetics. National Library of Medicine (US), 2000. <http://clinicaltrials.gov/show/NCT00305604> (accessed March 10, 2017).
154. Barzilai N, Guo H, Mahoney EM, et al. Efficacy and tolerability of sitagliptin monotherapy in elderly patients with type 2 diabetes: A randomized, double-blind, placebo-controlled trial. *Curr Med Res Opin* 2011; **27**: 1049-1058.
155. Merck. Sitagliptin metformin add-on study in patients with type 2 diabetes mellitus. National Library of Medicine (US), 2000. <http://clinicaltrials.gov/show/NCT00337610> (accessed March 10, 2017).
156. Raz I, Chen Y, Wu M, et al. Efficacy and safety of sitagliptin added to ongoing metformin therapy in patients with type 2 diabetes. *Curr Med Res Opin* 2008; **24**: 537-550.
157. Merck. Sitagliptin and pioglitazone mechanism of action study in type 2 diabetes mellitus. National Library of Medicine (US), 2000. <http://clinicaltrials.gov/show/NCT00511108> (accessed March 10, 2017).
158. Alba M, Ahren B, Inzucchi SE, et al. Sitagliptin and pioglitazone provide complementary effects on postprandial glucose and pancreatic islet cell function. *Diabetes, Obesity & Metabolism* 2013; **15**: 1101-1110.
159. Takeda. Efficacy of alogliptin and with pioglitazone in patients with type 2 diabetes. National

- Library of Medicine (US), 2000. <http://clinicaltrials.gov/show/NCT00655863> (accessed March 10, 2017).
160. Van Raalte DH, van Genugten RE, Eliasson B, et al. The effect of alogliptin and pioglitazone combination therapy on various aspects of beta-cell function in patients with recent-onset type 2 diabetes. *Eur J Endocrinol* 2014; **170**: 565-574.
161. Takeda. Efficacy and safety of alogliptin compared to glipizide in elderly diabetics. National Library of Medicine (US), 2000. <http://clinicaltrials.gov/show/NCT00707993> (accessed March 10, 2017).
162. Rosenstock J, Wilson C, Fleck P. Alogliptin versus glipizide monotherapy in elderly type 2 diabetes mellitus patients with mild hyperglycaemia: a prospective, double-blind, randomized, 1-year study. *Diabetes Obes Metab* 2013; **15**: 906-914.
163. Sanofi. GLP-1 Receptor Agonist Lixisenatide in Patients With Type 2 Diabetes for Glycemic Control and Safety Evaluation, on Top of Sulfonylurea (GETGOAL-S). National Library of Medicine (US), 2000. <http://clinicaltrials.gov/show/NCT00713830> (accessed March 10, 2017).
164. Sanofi. GLP-1 Receptor Agonist Lixisenatide in Patients With Type 2 Diabetes for Glycemic Control and Safety Evaluation, on Top of Basal Insulin (GETGOAL-L). National Library of Medicine (US), 2000. <http://clinicaltrials.gov/show/NCT00715624> (accessed March 10, 2017).
165. Boehringer Ingelheim Pharmaceuticals. Safety and efficacy in type 2 diabetic patients with severe chronic renal impairment, 5 mg BI 1356 (linagliptin) vs. placebo, insulin background inclusive. National Library of Medicine (US), 2000. <http://clinicaltrials.gov/show/NCT00800683> (accessed March 10, 2017).
166. Boehringer Ingelheim Pharmaceuticals. Randomized, double-blind (db), placebo-controlled 18 week study of linagliptin (BI 1356) in type 2 diabetic patients with insufficient glycaemic control on a sulfonylurea drug. National Library of Medicine (US), 2000. <http://clinicaltrials.gov/show/NCT00819091> (accessed March 10, 2017).
167. Lewin AJ, Arvay L, Liu D, Patel S, von Eynatten M, Woerle HJ. Efficacy and Tolerability of Linagliptin Added to a Sulfonylurea Regimen in Patients With Inadequately Controlled Type 2 Diabetes Mellitus: An 18-Week, Multicenter, Randomized, Double-Blind, Placebo-Controlled Trial. *Clin Ther* 2012; **34**: 1909-1919.e1915.
168. GlaxoSmithKline. A study to determine the safety and efficacy of albiglutide in subjects with type 2 diabetes. National Library of Medicine (US), 2000. <http://clinicaltrials.gov/show/NCT00839527> (accessed March 10, 2017).
169. Boehringer Ingelheim. Empagliflozin (BI 10773) in type two diabetes (T2D) patients, open label extension. National Library of Medicine (US), 2000. <http://clinicaltrials.gov/show/NCT00881530> (accessed March 10, 2017).
170. Ferrannini E, Berk A, Hantel S, et al. Long-term safety and efficacy of empagliflozin, sitagliptin, and metformin: An active-controlled, parallel-group, randomized, 78-week open-label extension study in patients with type 2 diabetes. *Diabetes Care* 2013; **36**: 4015-4021.
171. Eli Lilly and Company. A study in participants with type 2 diabetes mellitus (AWARD-2). National Library of Medicine (US), 2000. <http://clinicaltrials.gov/show/NCT01075282> (accessed March 10, 2017).
172. Takeda Pharmaceutical Company Limited. Efficacy and safety of alogliptin used in combination with sulfonylurea in participants with type 2 diabetes in japan. National Library of Medicine (US), 2000. <http://clinicaltrials.gov/show/NCT01318083> (accessed March 10, 2017).

173. Seino Y, Hiroi S, Hirayama M, Kaku K. Efficacy and safety of alogliptin added to sulfonylurea in Japanese patients with type 2 diabetes: A randomized, double-blind, placebo-controlled trial with an open-label, long-term extension study. *J Diabetes Investig* 2012; **3**: 517-525.
174. Eli Lilly and Company. A Study Comparing the Effects and Safety of Dulaglutide With Glimpiride in Type 2 Diabetes Mellitus. National Library of Medicine (US), 2000. <http://clinicaltrials.gov/show/NCT01644500> (accessed March 10, 2017).
175. Eli Lilly and Company. A Study Comparing the Effects and Safety of Dulaglutide With Insulin Glargine in Type 2 Diabetes Mellitus. National Library of Medicine (US), 2000. <http://clinicaltrials.gov/show/NCT01648582> (accessed March 10, 2017).
176. Merck Sharp & Dohme Corp. A Study of the Safety and Efficacy of Omarigliptin (MK-3102) Compared With Glimpiride in Participants With Type 2 Diabetes Mellitus With Inadequate Glycemic Control on Metformin (MK-3102-016). National Library of Medicine (US), 2000. <http://clinicaltrials.gov/show/NCT01682759> (accessed March 10, 2017).
177. Merck Sharp & Dohme Corp. A Study to Assess the Safety and Efficacy of Omarigliptin (MK-3102) in Participants With Type 2 Diabetes Mellitus (T2DM) and Inadequate Glycemic Control (MK-3102-011). National Library of Medicine (US), 2000. <http://clinicaltrials.gov/show/NCT01717313> (accessed March 10, 2017).
178. Boehringer Ingelheim, Eli Lilly and Company. Linagliptin as Add on Therapy to Empagliflozin 10 mg or 25 mg With Background Metformin in Patient With Type 2 Diabetes. National Library of Medicine (US), 2000. <http://clinicaltrials.gov/show/NCT01778049> (accessed March 10, 2017).
179. Takeda. Efficacy and Safety of Alogliptin and Metformin Fixed-Dose Combination in Participants With Type 2 Diabetes. National Library of Medicine (US), 2000. <http://clinicaltrials.gov/show/NCT01890122> (accessed March 10, 2017).
180. Ning G, Li L, Ma J, et al. Vildagliptin as add-on therapy to insulin improves glycemic control without increasing risk of hypoglycemia in Asian, predominantly Chinese, patients with type 2 diabetes mellitus. *J Diabetes* 2016; **8**: 345-353.
181. Nowicki M, Rychlik I, Haller H, et al. Long-term treatment with the dipeptidyl peptidase-4 inhibitor saxagliptin in patients with type 2 diabetes mellitus and renal impairment: A randomised controlled 52-week efficacy and safety study. *Int J Clin Pract* 2011; **65**: 1230-1239.
182. Nowicki M, Rychlik I, Haller H, Warren ML, Suchower L, Gause-Nilsson I. Saxagliptin improves glycaemic control and is well tolerated in patients with type 2 diabetes mellitus and renal impairment. *Diabetes Obes Metab* 2011; **13**: 523-532.
183. AstraZeneca; Bristol-Myers Squibb. Treatment effect of saxagliptin compared with placebo in patients with type 2 diabetes and renal impairment. National Library of Medicine (US), 2000. <http://clinicaltrials.gov/show/NCT00614939> (accessed March 10, 2017).
184. Odawara M, Hamada I, Suzuki M. Efficacy and Safety of Vildagliptin as Add-on to Metformin in Japanese Patients with Type 2 Diabetes Mellitus. *Diabetes Ther* 2014; **5**: 169-181.
185. Oe H, Nakamura K, Kihara H, et al. Comparison of effects of sitagliptin and voglibose on left ventricular diastolic dysfunction in patients with type 2 diabetes: Results of the 3D trial. *Cardiovasc Diabetol* 2015; **14**: 83.
186. Oyama J-I MTKMITSYKKKHAMIMDKNMSMM. The Effect of Sitagliptin on Carotid Artery Atherosclerosis in Type 2 Diabetes: The PROLOGUE Randomized Controlled Trial. *PLoS medicine* 2016; **13**.
187. Pan C, Yang W, Barona JP, et al. Comparison of vildagliptin and acarbose monotherapy in



patients with type 2 diabetes: A 24-week, double-blind, randomized trial. *Diabet Med* 2008; **25**: 435-441.

188. Pan CY, Yang W, Tou C, Gause-Nilsson I, Zhao J. Efficacy and safety of saxagliptin in drug-naive Asian patients with type 2 diabetes mellitus: A randomized controlled trial. *Diabetes Metab Res Rev* 2012; **28**: 268-275.

189. AstraZeneca; Bristol-Myers Squibb. Evaluate efficacy and safety of saxagliptin in adult patients with type 2 diabetes inadequate glycemic control. National Library of Medicine (US), 2000. <http://clinicaltrials.gov/show/NCT00698932> (accessed March 10, 2017).

190. Pan C, Han P, Ji Q, et al. Efficacy and safety of alogliptin in patients with type 2 diabetes mellitus: a multicentre, randomized, double-blind, placebo-controlled, phase 3 study in mainland China, Taiwan, and Hong Kong. *J Diabetes* 2016.

191. Pérez-Monteverde A, Seck T, Xu L, et al. Efficacy and safety of sitagliptin and the fixed-dose combination of sitagliptin and metformin vs. pioglitazone in drug-naïve patients with type 2 diabetes. *Int J Clin Pract* 2011; **65**: 930-938.

192. Merck. A study to evaluate the efficacy and safety of sitagliptin and MK0431A in comparison to a commonly used medication in patients with type 2 diabetes (0431-068)(COMPLETED). National Library of Medicine (US), 2000. <http://clinicaltrials.gov/show/NCT00541450> (accessed March 10, 2017).

193. Pfutzner A, Paz-Pacheco E, Allen E, Frederich R, Chen R. Initial combination therapy with saxagliptin and metformin provides sustained glycaemic control and is well tolerated for up to 76 weeks. *Diabetes Obes Metab* 2011; **13**: 567-576.

194. Jadzinsky M, Pfutzner A, Paz-Pacheco E, et al. Saxagliptin given in combination with metformin as initial therapy improves glycaemic control in patients with type 2 diabetes compared with either monotherapy: A randomized controlled trial. *Diabetes Obes Metab* 2009; **11**: 611-622.

195. Bristol-Myers Squibb. A phase 3 study of BMS-477118 in combination with metformin in subjects with type 2 diabetes who are not controlled with diet and exercise. National Library of Medicine (US), 2000. <http://clinicaltrials.gov/show/NCT00327015> (accessed March 10, 2017).

196. Pinget M, Goldenberg R, Niemoeller E, Muehlen-Bartmer I, Guo H, Aronson R. Efficacy and safety of lixisenatide once daily versus placebo in type 2 diabetes insufficiently controlled on pioglitazone (GetGoal-P). *Diabetes Obes Metab* 2013; **15**: 1000-1007.

197. Pratley RE, Jauffret-Kamel S, Galbreath E, Holmes D. Twelve-week monotherapy with the DPP-4 inhibitor vildagliptin improves glycemic control in subjects with type 2 diabetes. *Horm Metab Res* 2006; **38**: 423-428.

198. Pratley RE, Reusch JEB, Fleck PR, Wilson CA, Mekki Q. Efficacy and safety of the dipeptidyl peptidase-4 inhibitor alogliptin added to pioglitazone in patients with type 2 diabetes: A randomized, double-blind, placebo-controlled study. *Curr Med Res Opin* 2009; **25**: 2361-2371.

199. Takeda. Study of alogliptin combined with pioglitazone in subjects with type 2 diabetes mellitus. National Library of Medicine (US), 2000. <http://clinicaltrials.gov/show/NCT00286494> (accessed March 10, 2017).

200. Pratley RE, Kipnes MS, Fleck PR, et al. Efficacy and safety of the dipeptidyl peptidase-4 inhibitor alogliptin in patients with type 2 diabetes inadequately controlled by glyburide monotherapy. *Diabetes Obes Metab* 2009; **11**: 167-176.

201. Takeda. Study of alogliptin combined with sulfonylurea in subjects with type 2 diabetes mellitus. National Library of Medicine (US), 2000. <http://clinicaltrials.gov/show/NCT00286468> (accessed

March 10, 2017).

202. Pratley RE, Urosevic D, Boldrin M, Balena R. Efficacy and tolerability of taspoglutide versus pioglitazone in subjects with type 2 diabetes uncontrolled with sulphonylurea or sulphonylurea-metformin therapy: A randomized, double-blind study (T-emerge 6). *Diabetes Obes Metab* 2013; **15**: 234-240.
203. Pratley RE, Fleck P, Wilson C. Efficacy and safety of initial combination therapy with alogliptin plus metformin versus either as monotherapy in drug-naive patients with type 2 diabetes: A randomized, double-blind, 6-month study. *Diabetes Obes Metab* 2014; **16**: 613-621.
204. Takeda. Efficacy and safety of alogliptin plus metformin in patients with type 2 diabetes (AM7D). National Library of Medicine (US), 2000. <http://clinicaltrials.gov/show/NCT01023581> (accessed March 10, 2017).
205. Probstfield JL, Hirsch IB, Davis BR, et al. Glucose variability in a 26-week randomized comparison of mealtime treatment with rapid-acting insulin versus glp-1 agonist in participants with type 2 diabetes at high cardiovascular risk. *Diabetes Care* 2016; **39**: 973-981.
206. Raz I, Hoekstra J, Fonseca V, et al. Efficacy and safety of taspoglutide monotherapy in drug-naive type 2 diabetic patients after 24 weeks of treatment: Results of a randomized, double-blind, placebo-controlled phase 3 study (T-emerge 1). *Diabetes Care* 2012; **35**: 485-487.
207. Reasner C, Olansky L, Seck TL, et al. The effect of initial therapy with the fixed-dose combination of sitagliptin and metformin compared with metformin monotherapy in patients with type 2 diabetes mellitus. *Diabetes Obes Metab* 2011; **13**: 644-652.
208. Olansky L, Reasner C, Seck TL, et al. A treatment strategy implementing combination therapy with sitagliptin and metformin results in superior glycaemic control versus metformin monotherapy due to a low rate of addition of antihyperglycaemic agents. *Diabetes Obes Metab* 2011; **13**: 841-849.
209. Merck. MK0431A comparative study in patients with type 2 diabetes. National Library of Medicine (US), 2000. <http://clinicaltrials.gov/show/NCT00482729> (accessed March 10, 2017).
210. Riddle MC, Forst T, Aronson R, et al. Adding once-daily lixisenatide for type 2 diabetes inadequately controlled with newly initiated and continuously titrated basal insulin glargine: a 24-week, randomized, placebo-controlled study (GetGoal-Duo 1). *Diabetes Care* 2013; **36**: 2497-2503.
211. Roden M, Merker L, Christiansen AV, et al. Safety, tolerability and effects on cardiometabolic risk factors of empagliflozin monotherapy in drug-naive patients with type 2 diabetes: a double-blind extension of a Phase III randomized controlled trial. *Cardiovasc Diabetol* 2015; **14**: 154.
212. Roden M, Weng J, Eilbracht J, et al. Empagliflozin monotherapy with sitagliptin as an active comparator in patients with type 2 diabetes: A randomised, double-blind, placebo-controlled, phase 3 trial. *Lancet Diabetes Endocrinol* 2013; **1**: 208-219.
213. Boehringer Ingelheim; Eli Lilly and Company. Efficacy and safety of empagliflozin (BI 10773) versus placebo and sitagliptin over 24 weeks in patients with type 2 diabetes. National Library of Medicine (US), 2000. <http://clinicaltrials.gov/show/NCT01177813> (accessed March 10, 2017).
214. Rosenstock J, Sankoh S, List JF. Glucose-lowering activity of the dipeptidyl peptidase-4 inhibitor saxagliptin in drug-naive patients with type 2 diabetes. *Diabetes Obes Metab* 2008; **10**: 376-386.
215. Bristol-Myers Squibb. Study of multiple doses of saxagliptin (BMS-477118). National Library of Medicine (US), 2000. <http://clinicaltrials.gov/show/NCT00950599> (accessed March 10, 2017).
216. Rosenstock J, Rendell MS, Gross JL, Fleck PR, Wilson CA, Mekki Q. Alogliptin added to



insulin therapy in patients with type 2 diabetes reduces HbA1c without causing weight gain or increased hypoglycaemia. *Diabetes Obes Metab* 2009; **11**: 1145-1152.

217. Takeda. Efficacy and safety study of alogliptin and insulin in the treatment of type 2 diabetes. National Library of Medicine (US), 2000. <http://clinicaltrials.gov/show/NCT00286429> (accessed March 10, 2017).

218. Rosenstock J, Gross JL, Aguilar-Salinas C, et al. Long-term 4-year safety of saxagliptin in drug-naive and metformin-treated patients with Type 2 diabetes. *Diabet Med* 2013; **30**: 1472-1476.

219. Rosenstock J, Aguilar-Salinas C, Klein E, Nepal S, List J, Chen R. Effect of saxagliptin monotherapy in treatment-naive patients with type 2 diabetes. *Curr Med Res Opin* 2009; **25**: 2401-2411.

220. Bristol-Myers Squibb. Saxagliptin treatment in subjects with type 2 diabetes who are not controlled with diet and exercise. National Library of Medicine (US), 2000. <http://clinicaltrials.gov/show/NCT00121641> (accessed March 10, 2017).

221. Rosenstock J, Seman LJ, Jelaska A, et al. Efficacy and safety of empagliflozin, a sodium glucose cotransporter 2 (SGLT2) inhibitor, as add-on to metformin in type 2 diabetes with mild hyperglycaemia. *Diabetes Obes Metab* 2013; **15**: 1154-1160.

222. Boehringer Ingelheim. BI 10773 add-on to metformin in patients with type 2 diabetes. National Library of Medicine (US), 2000. <http://clinicaltrials.gov/show/NCT00749190> (accessed March 10, 2017).

223. Rosenstock J, Hanefeld M, Shamanna P, et al. Beneficial effects of once-daily lixisenatide on overall and postprandial glycemic levels without significant excess of hypoglycemia in Type 2 diabetes inadequately controlled on a sulfonylurea with or without metformin (GetGoal-S). *J Diabetes Complications* 2014; **28**: 386-392.

224. Rosenstock J, Hansen L, Zee P, et al. Dual add-on therapy in type 2 diabetes poorly controlled with metformin monotherapy: a randomized double-blind trial of saxagliptin plus dapagliflozin addition versus single addition of saxagliptin or dapagliflozin to metformin. *Diabetes care* 2015; **38**: 376-383.

225. Rosenstock J, Diamant M, Aroda VR, et al. Efficacy and Safety of LixiLan, a Titratable Fixed-Ratio Combination of Lixisenatide and Insulin Glargine, Versus Insulin Glargine in Type 2 Diabetes Inadequately Controlled on Metformin Monotherapy: The LixiLan Proof-of-Concept Randomized Trial. *Diabetes Care* 2016; **39**: 1579-1586.

226. Rosenstock J, Aronson R, Grunberger G, et al. Benefits of LixiLan, a Titratable Fixed-Ratio Combination of Insulin Glargine Plus Lixisenatide, Versus Insulin Glargine and Lixisenatide Monocomponents in Type 2 Diabetes Inadequately Controlled on Oral Agents: The LixiLan-O Randomized Trial. *Diabetes Care* 2016; **39**: 2026-2035.

227. Sanofi. Efficacy and Safety of Insulin Glargine/ Lixisenatide Fixed Ratio Combination Compared to Insulin Glargine Alone and Lixisenatide Alone on Top of Metformin in Patients With T2DM (LixiLan-O). National Library of Medicine (US), 2000. <http://clinicaltrials.gov/show/NCT02058147> (accessed March 10, 2017).

228. Ross SA, Rafeiro E, Meinicke T, Toorawa R, Weber-Born S, Woerle HJ. Efficacy and safety of linagliptin 2.5mg twice daily versus 5mg once daily in patients with type 2 diabetes inadequately controlled on metformin: A randomised, double-blind, placebo-controlled trial. *Curr Med Res Opin* 2012; **28**: 1465-1474.

229. Boehringer Ingelheim Pharmaceuticals. Linagliptin 2.5 mg twice daily versus 5 mg once daily as

- add-on therapy to twice daily metformin in type 2 diabetes. National Library of Medicine (US), 2000. <http://clinicaltrials.gov/show/NCT01012037> (accessed March 10, 2017).
230. Russell-Jones D, Cuddihy RM, Hanefeld M, et al. Efficacy and safety of exenatide once weekly versus metformin, pioglitazone, and sitagliptin used as monotherapy in drug-naïve patients with type 2 diabetes (DURATION-4): A 26-week double-blind study. *Diabetes Care* 2012; **35**: 252-258.
231. Scherbaum WA, Schweizer A, Mari A, et al. Efficacy and tolerability of vildagliptin in drug-naïve patients with type 2 diabetes and mild hyperglycaemia. *Diabetes Obes Metab* 2008; **10**: 675-682.
232. Scherbaum WA, Schweizer A, Mari A, et al. Evidence that vildagliptin attenuates deterioration of glycaemic control during 2-year treatment of patients with type 2 diabetes and mild hyperglycaemia. *Diabetes Obes Metab* 2008; **10**: 1114-1124.
233. Schernthaner G, Gross JL, Rosenstock J, et al. Canagliflozin compared with sitagliptin for patients with type 2 diabetes who do not have adequate glycemic control with metformin plus sulfonyleurea: a 52-week randomized trial. *Diabetes Care* 2013; **36**: 2508-2515.
234. Janssen Research & Development, LLC. The CANTATA-D2 trial (canagliflozin treatment and trial analysis - DPP-4 inhibitor second comparator trial). National Library of Medicine (US), 2000. <http://clinicaltrials.gov/show/NCT01137812> (accessed March 10, 2017).
235. Schernthaner G, Duran-Garcia S, Hanefeld M, et al. Efficacy and tolerability of saxagliptin compared with glimepiride in elderly patients with type 2 diabetes: A randomized, controlled study (GENERATION). *Diabetes Obes Metab* 2015; **17**: 630-638.
236. AstraZeneca. Saxagliptin compared to glimepiride in elderly type 2 diabetes patients, with inadequate glycemic control on metformin (GENERATION). National Library of Medicine (US), 2000. <http://clinicaltrials.gov/show/NCT01006603> (accessed March 10, 2017).
237. Schweizer A, Couturier A, Foley JE, Dejager S. Comparison between vildagliptin and metformin to sustain reductions in HbA1c over 1 year in drug-naïve patients with Type 2 diabetes. *Diabet Med* 2007; **24**: 955-961.
238. Schweizer A, Dejager S, Bosi E. Comparison of vildagliptin and metformin monotherapy in elderly patients with type 2 diabetes: A 24-week, double-blind, randomized trial. *Diabetes Obes Metab* 2009; **11**: 804-812.
239. Seck T, Nauck M, Sheng D, et al. Safety and efficacy of treatment with sitagliptin or glipizide in patients with type 2 diabetes inadequately controlled on metformin: A 2-year study. *Int J Clin Pract* 2010; **64**: 562-576.
240. Nauck MA, Meininger G, Sheng D, et al. Efficacy and safety of the dipeptidyl peptidase-4 inhibitor, sitagliptin, compared with the sulfonyleurea, glipizide, in patients with type 2 diabetes inadequately controlled on metformin alone: A randomized, double-blind, non-inferiority trial. *Diabetes Obes Metab* 2007; **9**: 194-205.
241. Merck. An investigational drug study in patients with type 2 diabetes mellitus. National Library of Medicine (US), 2000. <http://clinicaltrials.gov/show/NCT00094770> (accessed March 10, 2017).
242. Seino Y, Rasmussen MF, Nishida T, Kaku K. Efficacy and safety of the once-daily human GLP-1 analogue, liraglutide, vs glibenclamide monotherapy in Japanese patients with type 2 diabetes. *Curr Med Res Opin* 2010; **26**: 1013-1022.
243. Kaku K, Rasmussen MF, Nishida T, Seino Y. Fifty-two-week, randomized, multicenter trial to compare the safety and efficacy of the novel glucagon-like peptide-1 analog liraglutide vs glibenclamide in patients with type2 diabetes. *J Diabetes Investig* 2011; **2**: 441-447.

244. Novo Nordisk. Effect of liraglutide on blood glucose control in subjects with type 2 diabetes. National Library of Medicine (US), 2000. <http://clinicaltrials.gov/show/NCT00393718> (accessed March 10, 2017).
245. Seino Y, Fujita T, Hiroi S, Hirayama M, Kaku K. Alogliptin plus voglibose in Japanese patients with type 2 diabetes: A randomized, double-blind, placebo-controlled trial with an open-label, long-term extension. *Curr Med Res Opin* 2011; **27**: 21-29.
246. Takeda Pharmaceutical Company Limited. Efficacy and safety of alogliptin used in combination with  $\alpha$ -glucosidase inhibitor in participants with type 2 diabetes in Japan. National Library of Medicine (US), 2000. <http://clinicaltrials.gov/show/NCT01263483> (accessed March 10, 2017).
247. Seino Y, Miyata Y, Hiroi S, Hirayama M, Kaku K. Efficacy and safety of alogliptin added to metformin in Japanese patients with type 2 diabetes: A randomized, double-blind, placebo-controlled trial with an open-label, long-term extension study. *Diabetes Obes Metab* 2012; **14**: 927-936.
248. Takeda Pharmaceutical Company Limited. Efficacy and safety of alogliptin used combination with metformin in participants with type 2 diabetes in japan. National Library of Medicine (US), 2000. <http://clinicaltrials.gov/show/NCT01318109> (accessed March 10, 2017).
249. Seino Y, Min KW, Niemoeller E, et al. Randomized, double-blind, placebo-controlled trial of the once-daily GLP-1 receptor agonist lixisenatide in Asian patients with type 2 diabetes insufficiently controlled on basal insulin with or without a sulfonylurea (GetGoal-L-Asia). *Diabetes Obes Metab* 2012; **14**: 910-917.
250. Seino Y, Inagaki N, Miyahara H, et al. A randomized dose-finding study demonstrating the efficacy and tolerability of albiglutide in Japanese patients with type 2 diabetes mellitus. *Curr Med Res Opin* 2014; **30**: 1095-1106.
251. GlaxoSmithKline. Dose ranging study of albiglutide in japanese subjects. National Library of Medicine (US), 2000. <http://clinicaltrials.gov/show/NCT01098461> (accessed March 10, 2017).
252. Seino Y, Kaneko S, Fukuda S, et al. Combination therapy with liraglutide and insulin in Japanese patients with type 2 diabetes: A 36-week, randomized, double-blind, parallel-group trial. *J Diabetes Investig* 2016; **7**: 565-573.
253. Sheu W-H, Gantz I, Chen M, et al. Safety and efficacy of omarigliptin (MK-3102), a novel Once-Weekly DPP-4 Inhibitor for the treatment of patients with type 2 diabetes. *Diabetes care* 2015; **38**: 2106-2114.
254. Strain WD, Lukashevich V, Kothny W, Hoellinger MJ, Paldanius PM. Individualised treatment targets for elderly patients with type 2 diabetes using vildagliptin add-on or lone therapy (INTERVAL): a 24 week, randomised, double-blind, placebo-controlled study. *Lancet* 2013; **382**: 409-416.
255. Tajima N, Kadowaki T, Odawara M, Nishii M, Taniguchi T, Ferreira JCA. Addition of sitagliptin to ongoing glimepiride therapy in Japanese patients with type 2 diabetes over 52 weeks leads to improved glycemc control. *Diabetology International* 2011; **2**: 32-44.
256. Terauchi Y, Sato Y, Takeuchi M, Imaoka T. Monotherapy with the once weekly GLP-1 receptor agonist dulaglutide for 12 weeks in Japanese patients with type 2 diabetes: Dose-dependent effects on glycaemic control in a randomised, Double-blind, Placebo-controlled study. *Endocr J* 2014; **61**: 949-959.
257. Thrasher J, Daniels K, Patel S, Whetteckey J, Woerle HJ. Efficacy and safety of linagliptin in black/African American patients with type 2 diabetes: A 6-month, randomized, double-blind, placebo-controlled study. *Endocr Pract* 2014; **20**: 412-420.

258. Boehringer Ingelheim Pharmaceuticals; Eli Lilly and Company. Efficacy and safety of linagliptin (BI 1356) in black/african americans with type 2 diabetes with a MTT sub-study. National Library of Medicine (US), 2000. <http://clinicaltrials.gov/show/NCT01194830> (accessed March 10, 2017).
259. Umpierrez GE, Blevins T, Rosenstock J, Cheng C, Anderson JH, Bastyr EJ. The effects of LY2189265, a long-acting glucagon-like peptide-1 analogue, in a randomized, placebo-controlled, double-blind study of overweight/obese patients with type 2 diabetes: The EGO study. *Diabetes Obes Metab* 2011; **13**: 418-425.
260. Umpierrez G, Povedano ST, Manghi FP, Shurzinske L, Pechtner V. Efficacy and safety of dulaglutide monotherapy versus metformin in type 2 diabetes in a randomized controlled trial (AWARD-3). *Diabetes Care* 2014; **37**: 2168-2176.
261. Vilsboll T, Rosenstock J, Yki-Jarvinen H, et al. Efficacy and safety of sitagliptin when added to insulin therapy in patients with type 2 diabetes. *Diabetes Obes Metab* 2010; **12**: 167-177.
262. Wang W YJYGGYPSZCITNG. Efficacy and safety of linagliptin in Asian patients with type 2 diabetes mellitus inadequately controlled by metformin: A multinational 24-week, randomized clinical trial. *J Diabetes* 2016; **8**: 229-237.
263. Weissman PN, Carr MC, Ye J, et al. HARMONY 4: Randomised clinical trial comparing once-weekly albiglutide and insulin glargine in patients with type 2 diabetes inadequately controlled with metformin with or without sulfonylurea. *Diabetologia* 2014; **57**: 2475-2484.
264. GlaxoSmithKline. A study to determine the safety and efficacy of albiglutide in patients with type 2 diabetes. National Library of Medicine (US), 2000. <http://clinicaltrials.gov/show/NCT00838916> (accessed March 10, 2017).
265. White JL, Buchanan P, Li J, Frederich R. A randomized controlled trial of the efficacy and safety of twice-daily saxagliptin plus metformin combination therapy in patients with type 2 diabetes and inadequate glycemic control on metformin monotherapy. *BMC Endocr Disord* 2014; **14**: 17.
266. Bristol-Myers Squibb; AstraZeneca. Efficacy and safety study of saxagliptin + metformin immediate release (IR) Versus metformin ir alone in type 2 diabetes mellitus. National Library of Medicine (US), 2000. <http://clinicaltrials.gov/show/NCT00885378> (accessed March 10, 2017).
267. Williams-Herman D, Johnson J, Teng R, et al. Efficacy and safety of sitagliptin and metformin as initial combination therapy and as monotherapy over 2 years in patients with type 2 diabetes. *Diabetes Obes Metab* 2010; **12**: 442-451.
268. Williams-Herman D, Johnson J, Teng R, et al. Efficacy and safety of initial combination therapy with sitagliptin and metformin in patients with type 2 diabetes: A 54-week study. *Curr Med Res Opin* 2009; **25**: 569-583.
269. Goldstein BJ, Feinglos MN, Lunceford JK, Johnson J, Williams-Herman DE. Effect of initial combination therapy with sitagliptin, a dipeptidyl peptidase-4 inhibitor, and metformin on glycemic control in patients with type 2 diabetes. *Diabetes Care* 2007; **30**: 1979-1987.
270. Merck. MK0431 (sitagliptin) and metformin co-administration factorial study in patients with type 2 diabetes mellitus. National Library of Medicine (US), 2000. <http://clinicaltrials.gov/show/NCT00103857> (accessed March 10, 2017).
271. Wysham C, Blevins T, Arakaki R, et al. Efficacy and safety of dulaglutide added onto pioglitazone and metformin versus exenatide in type 2 diabetes in a randomized controlled trial (AWARD-1). *Diabetes Care* 2014; **37**: 2159-2167.
272. Eli Lilly and Company. A study in participants with type 2 diabetes mellitus (AWARD-1).

National Library of Medicine (US), 2000. <http://clinicaltrials.gov/show/NCT01064687> (accessed March 10, 2017).

273. Yang W, Guan Y, Shentu Y, et al. The addition of sitagliptin to ongoing metformin therapy significantly improves glycemic control in Chinese patients with type 2 diabetes. *J Diabetes* 2012; **4**: 227-237.

274. Yang W, Xing X, Lv X, et al. Vildagliptin added to sulfonylurea improves glycemic control without hypoglycemia and weight gain in Chinese patients with type 2 diabetes mellitus. *J Diabetes* 2015; **7**: 174-181.

275. Yki-Jarvinen H, Rosenstock J, Duran-Garcia S, et al. Effects of adding linagliptin to basal insulin regimen for inadequately controlled type 2 diabetes: A >52-week randomized, double-blind study. *Diabetes Care* 2013; **36**: 3875-3881.

276. Boehringer Ingelheim Pharmaceuticals; Eli Lilly and Company. Efficacy and safety of linagliptin in combination with insulin in patients with type 2 diabetes. National Library of Medicine (US), 2000. <http://clinicaltrials.gov/show/NCT00954447> (accessed March 10, 2017).

277. Yokoh H, Kobayashi K, Sato Y, et al. Efficacy and safety of the dipeptidyl peptidase-4 inhibitor sitagliptin compared with alpha-glucosidase inhibitor in Japanese patients with type 2 diabetes inadequately controlled on metformin or pioglitazone alone (Study for an Ultimate Combination Therapy to Control Diabetes with Sitagliptin-1): A multicenter, randomized, open-label, non-inferiority trial. *J Diabetes Investig* 2015; **6**: 182-191.

278. Yu Pan C, Han P, Liu X, et al. Lixisenatide treatment improves glycaemic control in Asian patients with type 2 diabetes mellitus inadequately controlled on metformin with or without sulfonylurea: A randomized, double-blind, placebo-controlled, 24-week trial (GetGoal-M-Asia). *Diabetes Metab Res Rev* 2014; **30**: 726-735.

279. Zinman B, Gerich J, Buse JB, et al. Efficacy and safety of the human glucagon-like peptide-1 analog liraglutide in combination with metformin and thiazolidinedione in patients with type 2 diabetes (LEAD-4 Met+TZD). *Diabetes Care* 2009; **32**: 1224-1230.

280. Green JB, Bethel MA, Armstrong PW, et al. Effect of Sitagliptin on Cardiovascular Outcomes in Type 2 Diabetes. *N Engl J Med* 2015; **373**: 232-242.

281. Marso SP, Daniels GH, Brown-Frandsen K, et al. Liraglutide and Cardiovascular Outcomes in Type 2 Diabetes. *N Engl J Med* 2016; **375**: 311-322.

282. Marso SP, Bain SC, Consoli A, et al. Semaglutide and Cardiovascular Outcomes in Patients with Type 2 Diabetes. *N Engl J Med* 2016.

283. Pfeffer MA, Claggett B, Diaz R, et al. Lixisenatide in Patients with Type 2 Diabetes and Acute Coronary Syndrome. *N Engl J Med* 2015; **373**: 2247-2257.

284. Scirica BM, Bhatt DL, Braunwald E, et al. Saxagliptin and cardiovascular outcomes in patients with type 2 diabetes mellitus. *N Engl J Med* 2013; **369**: 1317-1326.

285. White WB, Cannon CP, Heller SR, et al. Alogliptin after acute coronary syndrome in patients with type 2 diabetes. *N Engl J Med* 2013; **369**: 1327-1335.
