# Supplementary material for: Incretin based treatments and mortality in patients with type 2 diabetes: systematic review and meta-analysis
Source: PubMed Central journal article supplement — BMJ. 2017 Jun 8;357:j2499. doi: 10.1136/bmj.j2499 (PMC5463186; doi:10.1136/bmj.j2499), 2017-06-08
Supplement: liuj036190.ww3.pdf [file liuj036190.ww3.pdf]

**Appendix 3 Supplementary funnel plots** [posted as supplied by author]

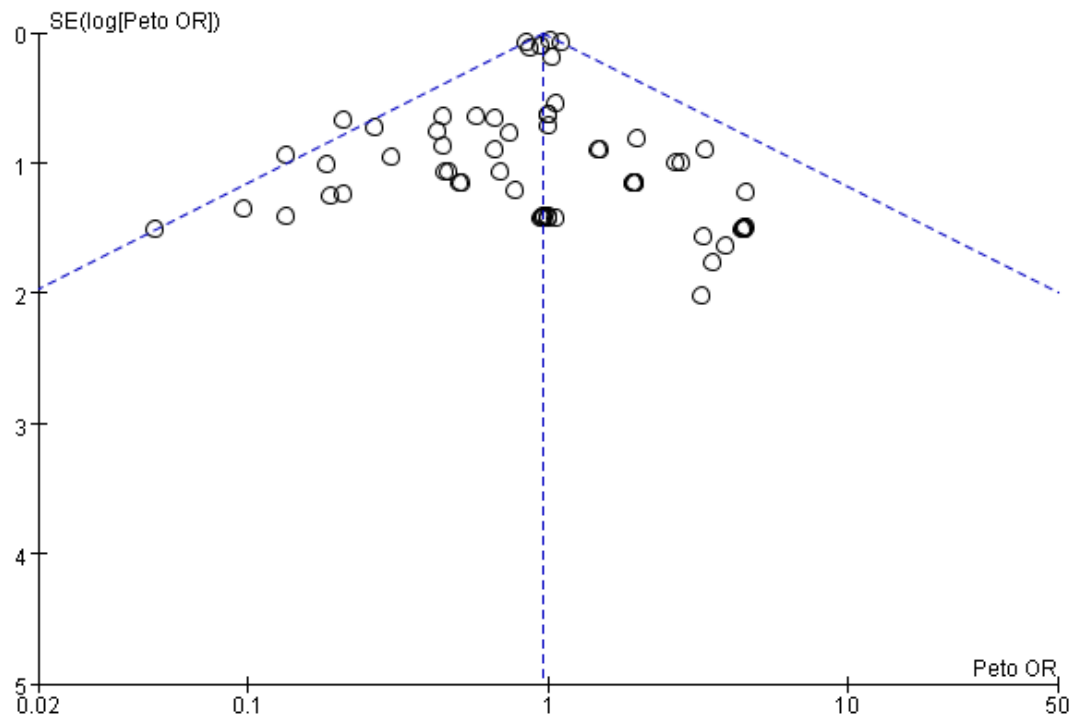

**Figure A. Funnel plot of randomised controlled trials reporting all cause mortality among patients receiving incretin versus control**

*Trials with zero or one event across arms were excluded.*
